# Supplementary material
Source: Frontiers journal article supplement (https://www.frontiersin.org/articles/552196)
Supplement: Table_1.XLS [file Table_1.XLS]

## Sheet: S1A
Gene	Symbol	description		Log2FC_RH	Log2FC_IFNG	Log2FC_IRH	Frequency	Control_1 TPM	Control_2 TPM	Control_3 TPM	IFNG_1 TPM	IFNG_2 TPM	RH_1 TPM	RH_2 TPM	RH_3 TPM	IRH_1 TPM	IRH_2 TPM
ENSBTAG00000019409	GNPTAB	N-acetylglucosamine-1-phosphate transferase subunits alpha and beta [Source:VGNC Symbol;Acc:VGNC:29479]		-7.72618			1	0.654092	0.365147	0.260071	0.314389	0.389486	0	0	0.160229	0.508954	0		IFNG = IFNG
ENSBTAG00000003501	SACM1L	SAC1 like phosphatidylinositide phosphatase [Source:VGNC Symbol;Acc:VGNC:34259]		-5.77988			1	0.406578	0.797461	0.262186	0.916813	0.407986	0	0	0.102679	0.222603	0		RH = Toxoplasma
ENSBTAG00000016939	C11H2orf42	chromosome 11 C2orf42 homolog [Source:VGNC Symbol;Acc:VGNC:52614]		-5.56604			1	1.73435	1.74915	1.52333	2.21631	2.00774	0.0199047	0.417257	2.02271	2.54577	0		IRH = IFNG+Toxoplasma
ENSBTAG00000015537	RASAL2	RAS protein activator like 2 [Source:VGNC Symbol;Acc:VGNC:33738]		-5.5027			1	1.20032	1.018	0.585673	0	0	0	0.00181371	0	0	0.486625		log2FC relative to Control
ENSBTAG00000038844	ANKRD35	ankyrin repeat domain 35 [Source:VGNC Symbol;Acc:VGNC:25927]		-4.60668			1	0.18934	0.0740968	0.0699658	0.0630912	0.0796527	0	0.00614539	0.111697	0.138438	0
ENSBTAG00000017694	TRPS1	transcriptional repressor GATA binding 1 [Source:VGNC Symbol;Acc:VGNC:36395]		-4.43682			1	0.164441	0.180854	0.129424	0.150699	0.124399	0	0.0677815	0	0	0
ENSBTAG00000004554	CAPZB	capping actin protein of muscle Z-line subunit beta [Source:VGNC Symbol;Acc:VGNC:26759]		-4.35595			1	0.521326	0.386988	0.565815	0.549626	0.370636	0	0	0.406728	0.320403	0.199909
ENSBTAG00000012939	DTNBP1	dystrobrevin binding protein 1 [Source:VGNC Symbol;Acc:VGNC:28233]		-2.54681			1	3.22821	1.72069	1.56597	4.48466	6.3977	0.24632	0.326225	3.53667	3.84041	0.511284
ENSBTAG00000021000	USF3	upstream transcription factor family member 3 [Source:VGNC Symbol;Acc:VGNC:53612]		-2.09786			1	1.58071	2.53415	2.01378	3.16408	2.75084	1.09625	0.260922	1.53705	2.05105	0.435426
ENSBTAG00000021811	ANGPT4	angiopoietin 4 [Source:VGNC Symbol;Acc:VGNC:25889]		-1.97708			1	3.74472	9.98652	5.29224	9.81654	8.5667	0.975774	1.51936	6.15593	6.45222	2.3544
ENSBTAG00000006485	TREML1	triggering receptor expressed on myeloid cells like 1 [Source:VGNC Symbol;Acc:VGNC:36300]		-1.76872			1	64.2721	46.1731	72.7897	34.6779	29.4136	13.0168	11.8531	26.4163	25.2979	38.6573
ENSBTAG00000000710	PIP5K1C	phosphatidylinositol-4-phosphate 5-kinase type 1 gamma [Source:VGNC Symbol;Acc:VGNC:32912]		-1.75			1	5.16664	5.63989	4.38763	3.88843	4.92846	1.93938	1.80999	3.55245	3.21028	1.09831
ENSBTAG00000010989	PIK3R1	phosphoinositide-3-kinase regulatory subunit 1 [Source:VGNC Symbol;Acc:VGNC:32894]		-1.7298			1	11.8282	20.5137	18.8251	21.0139	18.4375	5.14862	3.92568	17.1364	16.0548	7.37152
ENSBTAG00000017950	SLC4A8	solute carrier family 4 member 8 [Source:VGNC Symbol;Acc:VGNC:34897]		-1.67684			1	1.11024	1.16684	1.10978	1.41657	0.979988	0.667449	0.15991	0.710045	0.879026	0.468255
ENSBTAG00000012784	RACGAP1	Rac GTPase activating protein 1 [Source:VGNC Symbol;Acc:VGNC:33675]		-1.59116			1	6.33151	4.15017	5.18204	4.26103	2.77213	1.84166	1.75715	4.69735	3.42947	1.85159
ENSBTAG00000020485	ARRB1	arrestin beta 1 [Source:VGNC Symbol;Acc:VGNC:26169]		-1.57581			1	10.179	9.95371	4.90388	6.1398	8.23151	3.59515	3.57925	5.93366	5.86102	1.71968
ENSBTAG00000014429	KMT2D	lysine methyltransferase 2D [Source:VGNC Symbol;Acc:VGNC:30693]		-1.55045			1	1.4741	1.50906	0.58688	0.834719	0.672164	0.489422	0.341475	1.11526	0.876131	0.363997
ENSBTAG00000016152	DAB2	DAB adaptor protein 2 [Source:VGNC Symbol;Acc:VGNC:27865]		-1.54841			1	2.49238	2.22694	1.58536	2.61108	4.1269	0.626295	0.653371	2.29563	3.24373	0.963743
ENSBTAG00000015745	RAB3IL1	RAB3A interacting protein like 1 [Source:VGNC Symbol;Acc:VGNC:33655]		-1.53695			1	0.779639	0.679643	0.613769	0.580661	0.59003	0.156129	0.261799	0.524023	0.388823	0.332146
ENSBTAG00000044106	SPIDR	scaffold protein involved in DNA repair [Source:VGNC Symbol;Acc:VGNC:35216]		-1.51671			1	1.23968	1.2445	0.908505	1.15386	0.980824	0.361692	0.648578	1.11536	0.983199	0.296926
ENSBTAG00000002345	SETD1A	SET domain containing 1A, histone lysine methyltransferase [Source:VGNC Symbol;Acc:VGNC:34492]		-1.49882			1	1.09707	1.76379	0.716974	0.469948	0.482631	0.426641	0.448993	0.369482	0.568289	0.36744
ENSBTAG00000013810	GABBR2	gamma-aminobutyric acid type B receptor subunit 2 [Source:VGNC Symbol;Acc:VGNC:29188]		-1.47467			1	1.63399	0.915514	0.716636	0.262147	0.204561	0.391657	0.368744	0.356239	0.197347	0.392304
ENSBTAG00000010720	MIB2	mindbomb E3 ubiquitin protein ligase 2 [Source:VGNC Symbol;Acc:VGNC:31456]		-1.43116			1	6.18971	5.54053	4.42328	4.1797	5.5585	2.98692	3.05901	3.96691	3.64593	0.999947
ENSBTAG00000003877	ZCCHC24	zinc finger CCHC-type containing 24 [Source:VGNC Symbol;Acc:VGNC:54513]		-1.42337			1	8.55027	5.35235	8.36441	10.2806	12.0833	2.95295	1.73407	7.32437	9.10608	4.14959
ENSBTAG00000015314	ASL	argininosuccinate lyase [Source:NCBI gene;Acc:512771]		-1.41943			1	4.28514	5.50141	2.80666	2.28386	3.7155	1.04988	1.8966	2.36093	1.812	1.89391
ENSBTAG00000002791	SEC24C	SEC24 homolog C, COPII coat complex component [Source:VGNC Symbol;Acc:VGNC:34415]		-1.40025			1	3.9204	4.16612	2.63127	3.20097	2.92841	1.80254	1.42755	2.42662	3.3151	1.08339
ENSBTAG00000021587	SMPDL3A	sphingomyelin phosphodiesterase acid like 3A [Source:VGNC Symbol;Acc:VGNC:35033]		-1.38843			1	29.5577	17.8131	13.0961	31.8457	31.9552	7.86426	9.26287	26.8839	30.6006	6.6596
ENSBTAG00000006208	ADCY7	adenylate cyclase 7 [Source:VGNC Symbol;Acc:VGNC:25648]		-1.38824			1	1.92165	1.2319	1.54479	1.92265	1.70372	0.743795	0.700597	1.46081	1.20505	0.447543
ENSBTAG00000012509	DYRK1B	dual specificity tyrosine phosphorylation regulated kinase 1B [Source:VGNC Symbol;Acc:VGNC:28280]		-1.38234			1	3.77413	2.53331	2.56609	1.95223	1.62998	1.2441	0.678881	1.58158	1.1421	1.79933
ENSBTAG00000039993	CD1D	CD1D antigen, d polypeptide [Source:NCBI gene;Acc:516046]		-1.38152			1	2.64409	1.89729	2.26261	3.12597	2.88377	0.998362	0.627346	2.60619	2.83707	1.15987
ENSBTAG00000003015	SESN1	sestrin 1 [Source:VGNC Symbol;Acc:VGNC:34488]		-1.34278			1	37.9944	39.0341	26.9558	51.9476	46.8067	14.6297	15.4424	37.9196	43.7518	13.4337
ENSBTAG00000018272	RERE	arginine-glutamic acid dipeptide repeats [Source:VGNC Symbol;Acc:VGNC:33872]		-1.33127			1	25.3655	18.0584	13.8024	22.1337	25.1337	5.55615	8.46333	20.1034	20.8767	9.18315
ENSBTAG00000026819	HDAC7	histone deacetylase 7 [Source:VGNC Symbol;Acc:VGNC:49060]		-1.32681			1	10.6617	8.2749	5.77022	6.40123	5.91044	3.66071	2.4047	5.23428	4.16629	4.08098
ENSBTAG00000012667	CAMK2G	calcium/calmodulin dependent protein kinase II gamma [Source:VGNC Symbol;Acc:VGNC:55982]		-1.30298			1	6.62477	5.36678	5.90885	5.19503	3.60517	2.91028	1.81229	5.94229	5.39349	3.03706
ENSBTAG00000047801	CRELD2	cysteine rich with EGF like domains 2 [Source:VGNC Symbol;Acc:VGNC:27705]		-1.29867			1	10.3383	16.4182	17.4306	12.5661	15.0153	4.82625	4.93011	9.53916	9.39256	8.59606
ENSBTAG00000037640	PID1	phosphotyrosine interaction domain containing 1 [Source:VGNC Symbol;Acc:VGNC:32862]		-1.29301			1	85.9081	49.0413	92.0093	59.0486	57.3539	31.0143	26.4231	49.1096	54.9609	37.6957
ENSBTAG00000012721	HOGA1	4-hydroxy-2-oxoglutarate aldolase 1 [Source:VGNC Symbol;Acc:VGNC:29900]		-1.27857			1	13.3002	10.0908	7.69235	10.5923	14.8811	4.14145	4.07469	8.66046	12.7916	4.79131
ENSBTAG00000016254	HDAC5	histone deacetylase 5 [Source:VGNC Symbol;Acc:VGNC:50612]		-1.2608			1	11.4976	8.17351	6.74869	6.95372	7.07326	3.69574	3.97959	6.112	3.4224	3.45713
ENSBTAG00000003963	FER1L5	fer-1 like family member 5 [Source:VGNC Symbol;Acc:VGNC:28949]		-1.23834			1	0.47413	0.380961	0.412132	0.26266	0.427701	0.183831	0.159142	0.282841	0.315048	0.212522
ENSBTAG00000015321	TRERF1	transcriptional regulating factor 1 [Source:VGNC Symbol;Acc:VGNC:36302]		-1.23788			1	4.2006	3.43904	4.52023	2.55522	2.76667	1.72733	1.76092	3.51566	2.49383	1.83618
ENSBTAG00000021829	GM2A	GM2 ganglioside activator [Source:VGNC Symbol;Acc:VGNC:29431]		-1.217			1	669.434	382.022	495.287	555.008	433.836	225.11	174.47	494.652	423.945	290.927
ENSBTAG00000047717	FAM222B	family with sequence similarity 222 member B [Source:VGNC Symbol;Acc:VGNC:28801]		-1.21606			1	8.59708	8.31651	9.6401	9.46644	10.3925	3.95281	4.37308	7.31433	9.97228	3.65028
ENSBTAG00000007388	ZC3H12D	zinc finger CCCH-type containing 12D [Source:VGNC Symbol;Acc:VGNC:37100]		-1.21328			1	6.00544	4.87558	3.90516	6.63607	7.50087	2.08886	2.0032	5.73758	6.77212	2.49735
ENSBTAG00000008462	FAM43A	family with sequence similarity 43 member A [Source:VGNC Symbol;Acc:VGNC:28813]		-1.21201			1	9.7295	10.3576	8.1063	8.98947	9.81808	4.83019	3.51851	7.89221	7.45204	4.19143
ENSBTAG00000001941	SEMA4D	semaphorin 4D [Source:VGNC Symbol;Acc:VGNC:34436]		-1.2025			1	29.6972	26.8518	26.9085	32.4397	30.0341	7.22167	14.9399	24.0395	23.2761	18.0655
ENSBTAG00000011571	ACIN1	apoptotic chromatin condensation inducer 1 [Source:VGNC Symbol;Acc:VGNC:25539]		-1.19603			1	4.54428	4.98039	3.30177	7.0881	5.96017	1.48666	1.70599	5.3155	4.2279	2.69139
ENSBTAG00000013489	CYP27A1	cytochrome P450, family 27, subfamily A, polypeptide 1 [Source:NCBI gene;Acc:511960]		-1.19442			1	333.567	216.399	172.978	202.05	227.991	107.026	105.336	174.601	203.702	101.566
ENSBTAG00000000684	ARHGEF10L	Rho guanine nucleotide exchange factor 10 like [Source:VGNC Symbol;Acc:VGNC:26105]		-1.18972			1	11.5957	6.35673	8.19167	16.484	17.62	4.49031	3.3583	14.9243	12.7407	3.69147
ENSBTAG00000017706	SLC39A3	solute carrier family 39 member 3 [Source:VGNC Symbol;Acc:VGNC:52882]		-1.1757			1	5.90111	8.86392	4.94505	5.38267	5.60328	2.84718	3.27861	4.28454	4.09349	2.7794
ENSBTAG00000006941	ATAT1	alpha tubulin acetyltransferase 1 [Source:VGNC Symbol;Acc:VGNC:26236]		-1.16837			1	3.31791	3.52183	2.15627	3.61606	2.56468	1.29314	1.52023	2.43273	2.57888	1.26575
ENSBTAG00000016704	SLC37A2	solute carrier family 37 member 2 [Source:VGNC Symbol;Acc:VGNC:34843]		-1.15346			1	49.7251	34.1041	51.1759	38.1438	39.5796	18.7463	17.2551	27.524	32.8525	26.9337
ENSBTAG00000013725	RBSN	rabenosyn, RAB effector [Source:VGNC Symbol;Acc:VGNC:33818]		-1.1471			1	5.45568	4.86745	4.25221	3.61937	3.4166	1.9956	1.95828	3.86074	3.35687	2.88479
ENSBTAG00000019229	TMEM144	transmembrane protein 144 [Source:VGNC Symbol;Acc:VGNC:35976]		-1.13524			1	19.1299	19.3019	16.4602	22.2637	28.9662	6.30716	9.43115	18.4395	27.332	11.7341
ENSBTAG00000002885	MSR1	macrophage scavenger receptor 1 [Source:VGNC Symbol;Acc:VGNC:31704]		-1.10112			1	770.959	847.887	665.395	596.441	576.476	360.207	342.193	500.459	535.392	424.68
ENSBTAG00000009786	SCIN	scinderin [Source:VGNC Symbol;Acc:VGNC:34339]		-1.09726			1	27.668	27.8116	25.0325	20.52	16.0146	12.6219	10.2178	19.4929	12.7411	18.3011
ENSBTAG00000010667	PIK3IP1	phosphoinositide-3-kinase interacting protein 1 [Source:VGNC Symbol;Acc:VGNC:32893]		-1.09001			1	29.4258	26.4163	16.0537	17.5759	23.6285	10.595	11.776	14.9357	23.681	11.7201
ENSBTAG00000015939	NECTIN1	nectin cell adhesion molecule 1 [Source:VGNC Symbol;Acc:VGNC:54888]		-1.08538			1	30.4007	25.4104	24.1021	20.7685	24.0138	12.7351	14.8652	18.6777	25.958	11.6468
ENSBTAG00000047839	P2RY8	P2Y receptor family member 8 [Source:VGNC Symbol;Acc:VGNC:32531]		-1.08252			1	10.138	17.6326	11.6081	7.18606	7.61391	6.2707	6.2333	6.1172	6.73509	6.17113
ENSBTAG00000005934	TTYH3	tweety family member 3 [Source:VGNC Symbol;Acc:VGNC:36502]		-1.07511			1	6.8303	8.22138	8.39617	7.52168	7.987	3.84644	3.10765	7.64224	5.87634	4.60122
ENSBTAG00000001189	AP1B1	adaptor related protein complex 1 subunit beta 1 [Source:VGNC Symbol;Acc:VGNC:25976]		-1.07296			1	5.3866	3.02373	3.0741	4.12365	4.40676	1.99543	1.6418	4.74891	3.4089	1.83748
ENSBTAG00000017851	RXRA	retinoid X receptor alpha [Source:VGNC Symbol;Acc:VGNC:34230]		-1.06156			1	9.87404	6.77977	7.28912	4.80431	4.42467	3.91236	3.88429	4.96681	4.13484	3.88299
ENSBTAG00000008201	CCDC151	coiled-coil domain containing 151 [Source:VGNC Symbol;Acc:VGNC:26856]		-1.05775			1	3.44436	3.79077	4.04291	2.23801	2.49887	2.10884	1.38695	2.41984	2.03973	2.18382
ENSBTAG00000007512	PLA2G15	phospholipase A2 group XV [Source:VGNC Symbol;Acc:VGNC:32956]		-1.0537			1	50.2878	52.8757	36.6972	33.7865	35.3848	22.2526	26.0099	27.2678	30.5383	21.8064
ENSBTAG00000031906	ABHD16B	abhydrolase domain containing 16B [Source:VGNC Symbol;Acc:VGNC:25496]		-1.04779			1	3.49476	4.85624	3.04265	2.6964	3.19693	1.69217	2.12792	3.37254	2.88217	1.77945
ENSBTAG00000008774	UROC1	urocanate hydratase 1 [Source:VGNC Symbol;Acc:VGNC:36700]		-1.04589			1	2.32441	1.78398	2.15963	1.33579	1.73188	0.975695	1.04768	1.41342	1.32332	1.08782
ENSBTAG00000013636	DGKZ	diacylglycerol kinase zeta [Source:VGNC Symbol;Acc:VGNC:54417]		-1.04581			1	15.9234	19.484	14.3479	10.5528	10.1775	7.90872	7.01469	10.4374	10.597	10.0045
ENSBTAG00000022890	MBP	myelin basic protein [Source:VGNC Symbol;Acc:VGNC:54450]		-1.04299			1	2.29157	2.24722	1.95242	1.00662	1.50876	0.987141	1.49667	1.26002	1.64847	0.857435
ENSBTAG00000005958	PTK2B	protein tyrosine kinase 2 beta [Source:VGNC Symbol;Acc:VGNC:33519]		-1.04121			1	50.5801	42.993	41.5134	53.3032	57.0624	21.6135	21.0918	42.8772	49.0095	25.4486
ENSBTAG00000019070	PMP22	peripheral myelin protein 22 [Source:VGNC Symbol;Acc:VGNC:33074]		-1.03916			1	81.1556	66.8395	81.3735	53.6803	57.6664	33.1906	36.9583	43.0079	47.1285	48.2627
ENSBTAG00000009872	SPHK2	sphingosine kinase 2 [Source:VGNC Symbol;Acc:VGNC:35211]		-1.03676			1	4.98645	4.54446	3.26956	6.11868	5.02738	2.05636	1.74538	4.6953	4.85349	2.62659
ENSBTAG00000015801	EFNB1	ephrin B1 [Source:VGNC Symbol;Acc:VGNC:28359]		-1.03065			1	18.3542	20.8101	14.6722	14.922	14.9348	10.0859	8.29217	12.3808	11.659	8.92219
ENSBTAG00000007523	STX4	syntaxin 4 [Source:VGNC Symbol;Acc:VGNC:35440]		-1.02976			1	7.2464	6.4128	5.97075	5.30943	3.98805	2.90914	3.07864	4.17709	3.42124	4.00244
ENSBTAG00000001110	SLC16A5	solute carrier family 16 member 5 [Source:VGNC Symbol;Acc:VGNC:34691]		-1.01819			1	11.7956	10.8308	8.73719	20.6062	21.2857	5.58438	4.56611	17.7521	16.2929	5.7805
ENSBTAG00000011655	SAMD10	sterile alpha motif domain containing 10 [Source:VGNC Symbol;Acc:VGNC:34266]		-1.01465			1	1.65649	1.16487	1.53785	1.81058	1.73783	0.806809	0.648581	1.36789	1.20396	0.757142
ENSBTAG00000004907	MINK1	misshapen like kinase 1 [Source:VGNC Symbol;Acc:VGNC:31479]		-1.01246			1	2.93375	2.43185	2.79391	2.90388	1.97552	2.07488	1.19452	2.04929	2.58315	1.09862
ENSBTAG00000015582	HMOX1	heme oxygenase 1 [Source:VGNC Symbol;Acc:VGNC:29885]		-1.01011			1	322.087	492.239	539.165	490.932	435.331	265.931	176.66	388.06	371.483	249.423
ENSBTAG00000030257	SH3BP1	SH3 domain binding protein 1 [Source:VGNC Symbol;Acc:VGNC:34565]		-1.00547			1	70.2758	47.1887	41.6479	89.1409	89.7203	31.1639	25.9044	81.1921	70.3938	23.5834
ENSBTAG00000020698	MTHFR	methylenetetrahydrofolate reductase [Source:VGNC Symbol;Acc:VGNC:31731]		-1.00071			1	11.6204	12.1409	8.40565	6.87309	8.3304	4.60147	6.17093	5.41984	6.72211	5.90897
ENSBTAG00000010571	PPAT	phosphoribosyl pyrophosphate amidotransferase [Source:VGNC Symbol;Acc:VGNC:33186]		1.00257			1	13.9813	17.9766	18.955	19.9143	20.8727	39.3269	32.9692	24.8171	23.0768	35.5821
ENSBTAG00000021537	RWDD3	RWD domain containing 3 [Source:VGNC Symbol;Acc:VGNC:34228]		1.00286			1	3.22525	2.7352	3.59093	3.63284	3.47459	7.85049	6.04309	4.76041	4.36752	6.47793
ENSBTAG00000003892	0	cytidine monophosphate-N-acetylneuraminic acid hydroxylase [Source:NCBI gene;Acc:537017]		1.00328			1	1.35056	1.57534	1.25532	1.79973	1.87635	2.92362	3.09424	1.8452	1.22632	2.72621
ENSBTAG00000007895	SLC20A1	solute carrier family 20 member 1 [Source:VGNC Symbol;Acc:VGNC:34717]		1.00439			1	53.8068	72.0516	59.9385	63.53	58.9227	174.199	127.261	90.1697	71.0078	102.652
ENSBTAG00000014090	ARID5A	AT-rich interaction domain 5A [Source:VGNC Symbol;Acc:VGNC:26131]		1.00475			1	25.3509	19.6592	14.3412	34.3138	35.5321	50.8122	46.7501	39.807	31.6284	27.118
ENSBTAG00000020963	RASSF1	Ras association domain family member 1 [Source:VGNC Symbol;Acc:VGNC:33757]		1.00486			1	18.7473	16.7203	12.9011	14.5421	16.4246	38.6755	39.153	18.1252	16.1637	24.5666
ENSBTAG00000013357	PUM3	pumilio RNA binding family member 3 [Source:VGNC Symbol;Acc:VGNC:33571]		1.00708			1	21.0257	19.8402	17.9851	25.4328	23.8246	45.4234	50.7479	33.1354	29.6163	31.9048
ENSBTAG00000015338	DSCC1	DNA replication and sister chromatid cohesion 1 [Source:VGNC Symbol;Acc:VGNC:28217]		1.00785			1	7.27845	5.91423	9.22311	12.2983	10.9025	16.5508	16.7429	15.1195	11.4669	13.9296
ENSBTAG00000000210	ARHGAP31	Rho GTPase activating protein 31 [Source:VGNC Symbol;Acc:VGNC:26089]		1.01013			1	14.906	12.9688	12.6305	19.3198	16.5772	35.2389	30.4738	23.6199	20.3214	21.357
ENSBTAG00000019924	DDHD1	DDHD domain containing 1 [Source:VGNC Symbol;Acc:VGNC:27943]		1.01081			1	3.07598	5.06538	3.48153	4.16273	2.67768	9.0582	7.25903	3.20948	3.49049	7.82388
ENSBTAG00000011849	HDAC2	histone deacetylase 2 [Source:VGNC Symbol;Acc:VGNC:50610]		1.01307			1	16.4073	20.3136	23.963	22.2797	20.2178	43.0643	43.5078	27.6806	26.5213	43.3393
ENSBTAG00000016716	RRS1	ribosome biogenesis regulator 1 homolog [Source:VGNC Symbol;Acc:VGNC:34173]		1.0172			1	7.86783	8.89986	9.60949	7.83798	8.17503	22.4914	20.0524	12.2955	10.156	13.9721
ENSBTAG00000021693	RPP25	ribonuclease P and MRP subunit p25 [Source:VGNC Symbol;Acc:VGNC:34121]		1.02186			1	2.66668	3.30912	2.83302	5.17977	4.95183	7.28349	6.05323	4.18412	2.93917	4.72151
ENSBTAG00000026172	LRATD2	LRAT domain containing 2 [Source:VGNC Symbol;Acc:VGNC:28841]		1.02362			1	4.45774	3.48993	3.09684	4.66622	4.1848	10.4477	7.46974	7.97941	4.70315	6.23995
ENSBTAG00000008682	TLR3	toll like receptor 3 [Source:VGNC Symbol;Acc:VGNC:52833]		1.02476			1	9.98498	5.91605	6.74411	19.1754	12.4259	15.5507	14.5122	18.678	13.6208	17.8172
ENSBTAG00000020642	ZDHHC13	zinc finger DHHC-type containing 13 [Source:VGNC Symbol;Acc:VGNC:37128]		1.02657			1	15.9481	9.91493	10.4525	20.0428	16.435	27.9852	27.005	24.6334	21.8031	22.6758
ENSBTAG00000011197	IPMK	inositol polyphosphate multikinase [Source:VGNC Symbol;Acc:VGNC:30240]		1.02785			1	9.79232	13.3597	8.159	13.5016	13.5715	26.1041	26.0722	15.7983	14.8926	16.6226
ENSBTAG00000007802	BCLAF1	BCL2 associated transcription factor 1 [Source:VGNC Symbol;Acc:VGNC:26451]		1.03146			1	52.4372	63.0878	45.649	74.5185	62.1942	128.106	121.049	93.3769	83.9298	99.7766
ENSBTAG00000034529	HMGA1	high mobility group AT-hook 1 [Source:VGNC Symbol;Acc:VGNC:29874]		1.03281			1	47.7196	43.5662	47.597	42.8996	39.6001	128.292	89.8885	51.9606	39.4575	80.9588
ENSBTAG00000011419	HSPA9	heat shock protein family A (Hsp70) member 9 [Source:VGNC Symbol;Acc:VGNC:52243]		1.03529			1	203.968	151.362	128.768	164.728	166.27	410.103	441.63	251.489	220.579	223.46
ENSBTAG00000000879	C14H8orf33	chromosome 14 C8orf33 homolog [Source:NCBI gene;Acc:513585]		1.03602			1	10.3853	11.824	16.7487	11.9724	10.3015	31.3107	25.7716	15.2958	12.9616	24.5466
ENSBTAG00000013240	SLC3A2	solute carrier family 3 member 2 [Source:VGNC Symbol;Acc:VGNC:34871]		1.03689			1	211.246	146.878	102.528	112.58	142.172	359.909	378.11	201.093	207.724	224.888
ENSBTAG00000000163	DDIT4	DNA damage inducible transcript 4 [Source:VGNC Symbol;Acc:VGNC:27948]		1.0375			1	117.377	54.1942	53.6804	82.5948	113.064	140.652	164.905	111.431	118.004	148.192
ENSBTAG00000015986	NDE1	nudE neurodevelopment protein 1 [Source:VGNC Symbol;Acc:VGNC:31932]		1.04182			1	8.18216	11.0048	11.6313	5.22119	9.29577	21.8244	24.4656	7.64904	9.72573	18.5447
ENSBTAG00000046623	0	0		1.04221			1	10.9188	12.0565	19.091	13.2715	14.5583	29.1924	28.0896	13.1677	18.6086	30.2312
ENSBTAG00000054987	SLC25A40	solute carrier family 25, member 40 [Source:NCBI gene;Acc:613948]		1.04298			1	20.7681	16.1926	11.3976	18.7978	18.498	37.501	41.7705	28.1946	20.1724	26.9714
ENSBTAG00000026962	XPOT	exportin for tRNA [Source:VGNC Symbol;Acc:VGNC:37002]		1.0431			1	61.8964	47.691	43.3603	66.4637	64.4181	122.507	142.135	95.8578	81.8692	79.6779
ENSBTAG00000040151	GCH1	GTP cyclohydrolase 1 [Source:VGNC Symbol;Acc:VGNC:29286]		1.04354			1	10.2613	13.7414	13.4149	8.6246	9.45536	27.2346	27.6575	12.4082	9.76736	24.4853
ENSBTAG00000012745	PPAN	peter pan homolog (Drosophila) [Source:NCBI gene;Acc:522370]		1.04494			1	7.64429	7.67704	8.04925	9.45232	9.50562	20.7531	16.6585	12.2219	8.57556	13.1377
ENSBTAG00000009378	E2F5	E2F transcription factor 5 [Source:VGNC Symbol;Acc:VGNC:28289]		1.04544			1	15.3381	18.4598	13.1884	19.2609	17.0331	35.6076	40.414	23.0368	19.0305	24.417
ENSBTAG00000009543	ESYT1	extended synaptotagmin 1 [Source:VGNC Symbol;Acc:VGNC:28613]		1.05139			1	60.111	54.2684	59.7509	48.6124	46.7381	150.358	139.75	80.2771	71.686	94.6327
ENSBTAG00000010422	MDM2	MDM2 proto-oncogene [Source:VGNC Symbol;Acc:VGNC:31336]		1.05474			1	40.1662	47.9341	25.1448	51.8464	52.5384	91.5345	90.4221	69.3291	55.5023	65.4589
ENSBTAG00000006661	RALA	RAS like proto-oncogene A [Source:VGNC Symbol;Acc:VGNC:33698]		1.05622			1	32.1212	41.4096	39.9785	32.0173	36.2709	92.5639	80.8967	44.1417	43.6581	72.9915
ENSBTAG00000016740	ACLY	ATP citrate lyase [Source:VGNC Symbol;Acc:VGNC:25543]		1.05884			1	10.313	11.4817	11.8804	9.67286	9.32189	27.5328	21.1165	10.2979	10.3749	24.9458
ENSBTAG00000020878	DMTF1	cyclin D binding myb like transcription factor 1 [Source:VGNC Symbol;Acc:VGNC:28116]		1.05966			1	3.65455	2.91235	1.49622	3.65152	4.6494	5.49754	5.46696	4.75598	5.28867	5.95496
ENSBTAG00000003342	AMD1	adenosylmethionine decarboxylase 1 [Source:VGNC Symbol;Acc:VGNC:25859]		1.06002			1	70.8449	78.4016	68.7383	93.9329	88.9821	191.385	190.086	111.212	107.927	117.729
ENSBTAG00000003990	ITPRIP	inositol 1,4,5-trisphosphate receptor interacting protein [Source:VGNC Symbol;Acc:VGNC:30349]		1.06138			1	2.27185	2.10141	2.71975	2.42844	2.80204	5.39177	4.2566	3.28982	2.61052	5.75448
ENSBTAG00000014588	RSL1D1	ribosomal L1 domain containing 1 [Source:VGNC Symbol;Acc:VGNC:34180]		1.0641			1	25.3624	36.4434	39.6111	43.3663	38.3653	86.6435	70.1121	54.253	46.6785	64.5693
ENSBTAG00000006969	TUBB	tubulin beta class I [Source:NCBI gene;Acc:615087]		1.0641			1	591.264	437.947	728.88	592.449	525.538	1530.66	1206.71	804.269	680.272	1073
ENSBTAG00000006656	RANBP1	RAN binding protein 1 [Source:NCBI gene;Acc:533251]		1.06562			1	76.532	86.4782	99.227	91.0509	96.5424	223.575	174.985	128.956	111.84	166.752
ENSBTAG00000012342	LIMA1	LIM domain and actin binding 1 [Source:VGNC Symbol;Acc:VGNC:30886]		1.06787			1	24.9927	46.8209	38.0702	23.9582	23.8598	92.8128	75.1329	35.2564	31.5694	69.9297
ENSBTAG00000014521	UGDH	UDP-glucose 6-dehydrogenase [Source:VGNC Symbol;Acc:VGNC:36648]		1.07027			1	14.0571	21.9231	27.0925	26.6092	23.4899	52.1972	44.8637	27.6285	27.2554	40.7434
ENSBTAG00000045832	PHLPP1	PH domain and leucine rich repeat protein phosphatase 1 [Source:VGNC Symbol;Acc:VGNC:32840]		1.07139			1	2.60687	1.85169	1.63425	2.03267	2.55637	6.0956	4.94271	3.65145	3.01011	2.79124
ENSBTAG00000004735	CCNE1	cyclin E1 [Source:VGNC Symbol;Acc:VGNC:26966]		1.07366			1	9.49409	8.11822	12.6191	17.2147	12.4811	23.1179	17.4983	20.0563	14.4553	25.7629
ENSBTAG00000051704	TNFRSF10D	tumor necrosis factor receptor superfamily, member 10d, decoy with truncated death domain [Source:NCBI gene;Acc:782274]		1.07399			1	56.7235	65.5681	40.1887	69.442	110.711	105.256	158.224	86.5291	118.409	100.449
ENSBTAG00000040058	ORC5	origin recognition complex subunit 5 [Source:VGNC Symbol;Acc:VGNC:32450]		1.07529			1	8.62653	7.91671	11.262	12.8845	12.3651	22.111	23.1592	16.9968	13.4781	17.2958
ENSBTAG00000007394	RPL22L1	ribosomal protein L22 like 1 [Source:NCBI gene;Acc:614872]		1.07623			1	99.9853	84.1036	112.534	63.594	67.8972	245.903	214.415	114.48	98.7589	206.073
ENSBTAG00000000095	CD274	CD274 molecule [Source:VGNC Symbol;Acc:VGNC:27019]		1.07932			1	29.3441	37.9708	17.5654	43.0297	30.8878	78.513	63.4091	53.26	34.9444	46.0427
ENSBTAG00000023182	WNK3	WNK lysine deficient protein kinase 3 [Source:VGNC Symbol;Acc:VGNC:36951]		1.07981			1	0.207537	0.178731	0.1953	0.223964	0.273501	0.426275	0.412247	0.254234	0.268399	0.473486
ENSBTAG00000017125	PABPC4	poly(A) binding protein cytoplasmic 4 [Source:VGNC Symbol;Acc:VGNC:55644]		1.08206			1	85.4624	61.1272	76.5785	45.5988	45.3424	207.497	166.271	92.6261	75.9425	126.936
ENSBTAG00000015398	TJP1	tight junction protein 1 [Source:VGNC Symbol;Acc:VGNC:35881]		1.08231			1	2.27818	2.52039	2.73582	1.27024	1.1836	7.83566	5.10194	2.32306	1.59124	4.4398
ENSBTAG00000001174	MRPL15	mitochondrial ribosomal protein L15 [Source:VGNC Symbol;Acc:VGNC:31619]		1.08843			1	11.1109	14.5995	17.7047	12.9277	13.9709	36.5596	30.0892	17.6513	16.0071	29.1066
ENSBTAG00000010890	PRMT5	protein arginine methyltransferase 5 [Source:VGNC Symbol;Acc:VGNC:33350]		1.09412			1	7.75088	8.4702	8.83931	9.20741	8.44671	21.0185	19.6587	10.9054	10.9179	15.737
ENSBTAG00000002059	MCM9	minichromosome maintenance 9 homologous recombination repair factor [Source:VGNC Symbol;Acc:VGNC:31315]		1.0943			1	5.17906	4.43045	4.783	7.39514	6.59151	13.2364	11.2393	9.04861	7.56784	8.36588
ENSBTAG00000008184	CCT6A	chaperonin containing TCP1 subunit 6A [Source:NCBI gene;Acc:521540]		1.09573			1	52.7515	73.8735	83.0737	72.046	63.5636	168.249	159.717	87.0611	76.057	144.364
ENSBTAG00000000974	IARS1	isoleucyl-tRNA synthetase 1 [Source:VGNC Symbol;Acc:VGNC:30018]		1.09733			1	64.9381	41.6083	34.4472	82.4006	77.7232	114.938	127.518	114.303	97.4467	77.04
ENSBTAG00000006721	TWISTNB	TWIST neighbor [Source:VGNC Symbol;Acc:VGNC:53681]		1.09821			1	8.36735	8.0306	12.6856	14.4784	10.3479	24.4268	20.4374	15.2622	12.0238	19.3891
ENSBTAG00000006831	C8H9orf85	chromosome 8 C9orf85 homolog [Source:NCBI gene;Acc:614778]		1.10478			1	2.00413	2.02669	2.64008	2.64362	3.07961	4.16315	5.36598	4.09821	3.67212	5.6907
ENSBTAG00000003177	SLC25A33	solute carrier family 25 member 33 [Source:VGNC Symbol;Acc:VGNC:34759]		1.10545			1	18.7276	23.7156	15.8309	16.2206	16.0985	54.8443	49.1925	24.3845	22.2296	30.3777
ENSBTAG00000009545	PPEF1	protein phosphatase with EF-hand domain 1 [Source:VGNC Symbol;Acc:VGNC:33190]		1.10752			1	1.0928	0.936655	1.59565	1.3614	0.880271	2.85562	2.82142	2.31447	1.60263	2.48422
ENSBTAG00000018464	ZDHHC14	zinc finger DHHC-type containing 14 [Source:VGNC Symbol;Acc:VGNC:37129]		1.11512			1	3.55344	4.87524	2.79836	2.43465	1.67187	10.4835	9.58817	4.35175	2.80326	5.73065
ENSBTAG00000005155	ARL13B	ADP ribosylation factor like GTPase 13B [Source:VGNC Symbol;Acc:VGNC:26138]		1.11867			1	2.26194	2.28834	2.98687	4.10783	4.64802	5.93216	5.63403	5.0524	4.68497	5.38443
ENSBTAG00000004597	PIM2	Pim-2 proto-oncogene, serine/threonine kinase [Source:VGNC Symbol;Acc:VGNC:32900]		1.12023			1	2.50832	3.37779	3.02405	2.38739	2.61834	7.81411	8.08932	2.72008	3.172	4.90887
ENSBTAG00000015716	ERO1A	endoplasmic reticulum oxidoreductase 1 alpha [Source:VGNC Symbol;Acc:VGNC:28594]		1.12085			1	42.1912	48.7588	46.0495	42.681	44.5757	112.215	140.812	68.7168	64.3002	72.6458
ENSBTAG00000021636	GPR155	G protein-coupled receptor 155 [Source:VGNC Symbol;Acc:VGNC:29561]		1.12361			1	31.0893	30.0131	26.6153	39.8557	33.7525	80.1068	83.6958	50.3491	43.9093	47.236
ENSBTAG00000005430	MB21D2	Mab-21 domain containing 2 [Source:VGNC Symbol;Acc:VGNC:31272]		1.12472			1	5.29397	4.38671	4.28384	7.45915	6.24464	14.3824	11.8131	9.84338	7.23161	7.06185
ENSBTAG00000007681	DHFR	dihydrofolate reductase [Source:NCBI gene;Acc:508809]		1.12565			1	16.8257	20.6086	27.5984	42.1623	38.9224	56.0704	49.3478	47.1514	40.7759	45.8103
ENSBTAG00000019312	TFCP2	transcription factor CP2 [Source:VGNC Symbol;Acc:VGNC:35784]		1.12619			1	5.46991	7.73838	5.47244	5.5123	7.4342	15.8443	17.1049	9.31939	8.41719	10.9693
ENSBTAG00000015804	SIGMAR1	sigma non-opioid intracellular receptor 1 [Source:VGNC Symbol;Acc:VGNC:34619]		1.12707			1	24.5086	26.778	37.5062	27.0004	26.356	69.8514	60.2761	34.0089	30.7079	67.8107
ENSBTAG00000018479	PTPMT1	protein tyrosine phosphatase mitochondrial 1 [Source:VGNC Symbol;Acc:VGNC:33528]		1.12714			1	16.9389	15.989	19.3847	17.6649	18.1318	49.8646	40.9471	23.6051	18.7388	29.0021
ENSBTAG00000006126	GTF3C1	general transcription factor IIIC subunit 1 [Source:VGNC Symbol;Acc:VGNC:29702]		1.12733			1	9.09329	8.82993	8.70246	7.62125	8.40024	25.2296	22.4927	13.0072	11.9152	14.3097
ENSBTAG00000019478	NAAA	N-acylethanolamine acid amidase [Source:VGNC Symbol;Acc:VGNC:31854]		1.1288			1	28.8489	22.885	21.8594	31.1634	38.9377	70.5027	59.9547	51.5184	50.5998	41.5175
ENSBTAG00000006616	PTPN1	protein tyrosine phosphatase non-receptor type 1 [Source:VGNC Symbol;Acc:VGNC:33529]		1.12881			1	27.2277	31.7079	28.6535	34.947	34.0129	71.4929	56.0554	45.8107	38.8043	70.9145
ENSBTAG00000010763	DUSP16	dual specificity phosphatase 16 [Source:VGNC Symbol;Acc:VGNC:28253]		1.12952			1	3.39919	3.8695	2.48565	3.61997	2.78318	9.75344	8.85516	4.75799	3.59667	4.61285
ENSBTAG00000015053	CFL2	cofilin 2 [Source:VGNC Symbol;Acc:VGNC:27254]		1.13501			1	13.5905	12.9678	11.8873	13.3568	13.0974	34.577	34.3288	21.2534	18.5601	24.1915
ENSBTAG00000016307	CDC7	cell division cycle 7 [Source:VGNC Symbol;Acc:VGNC:27082]		1.13532			1	6.82868	5.90093	6.65831	12.0761	7.85855	22.88	12.1673	15.3055	8.72105	13.0145
ENSBTAG00000004413	RHOBTB3	Rho related BTB domain containing 3 [Source:VGNC Symbol;Acc:VGNC:33946]		1.13566			1	4.66515	3.97989	3.93089	2.66968	2.78609	10.2003	11.2107	4.03259	3.56667	8.18573
ENSBTAG00000005961	CDC42SE2	CDC42 small effector 2 [Source:VGNC Symbol;Acc:VGNC:27078]		1.13764			1	28.8296	36.4249	39.4163	47.4057	47.3235	93.3181	103.168	58.8402	52.6612	56.7559
ENSBTAG00000009846	MTHFD1L	methylenetetrahydrofolate dehydrogenase (NADP+ dependent) 1 like [Source:VGNC Symbol;Acc:VGNC:53798]		1.13876			1	30.7259	33.1033	31.6505	32.8611	35.3795	83.3994	84.6309	50.3504	50.5273	56.9699
ENSBTAG00000046180	0	0		1.14094			1	5.938	6.16933	4.86226	7.8256	7.40472	15.4497	14.7116	7.56327	8.18753	9.00251
ENSBTAG00000020040	LPCAT4	lysophosphatidylcholine acyltransferase 4 [Source:VGNC Symbol;Acc:VGNC:30964]		1.14261			1	3.37699	3.15362	5.40577	2.97615	3.06788	11.3428	8.61961	4.93644	4.24241	7.10253
ENSBTAG00000001794	RPL36	ribosomal protein L36 [Source:NCBI gene;Acc:768327]		1.14284			1	4.40947	3.85502	3.27536	3.84132	2.86998	10.6501	9.37926	4.70283	3.08211	6.35226
ENSBTAG00000018035	TGFBR1	transforming growth factor beta receptor 1 [Source:VGNC Symbol;Acc:VGNC:35804]		1.14426			1	37.778	43.2185	37.6078	55.3927	52.8221	107.776	101.75	68.3058	65.5626	75.5079
ENSBTAG00000009663	YBX3	Y-box binding protein 3 [Source:VGNC Symbol;Acc:VGNC:37018]		1.14729			1	94.1457	38.9148	45.6812	28.6787	25.8705	150.486	148.695	62.9709	52.6662	87.8414
ENSBTAG00000053721	RHOV	ras homolog family member V [Source:NCBI gene;Acc:538143]		1.15157			1	0.442067	0.589234	0.562616	0.439027	0.570925	1.26539	1.14895	0.51153	0.590835	1.23951
ENSBTAG00000004575	FAM126A	family with sequence similarity 126 member A [Source:VGNC Symbol;Acc:VGNC:28724]		1.15632			1	1.90907	1.37904	1.35007	0.825515	0.618527	3.36602	3.55732	1.8573	1.50949	4.04222
ENSBTAG00000018138	GK5	glycerol kinase 5 [Source:VGNC Symbol;Acc:VGNC:54783]		1.1574			1	10.888	9.02939	10.1831	12.5412	12.7555	24.4071	22.0366	16.9101	14.1509	24.4929
ENSBTAG00000001497	MRAS	muscle RAS oncogene homolog [Source:VGNC Symbol;Acc:VGNC:31597]		1.16399			1	5.82586	6.13469	10.164	4.0557	4.2402	21.8804	16.2177	4.6297	5.19438	13.0035
ENSBTAG00000017346	RASSF2	Ras association domain family member 2 [Source:VGNC Symbol;Acc:VGNC:33758]		1.16439			1	53.4235	55.2773	57.8067	61.3945	57.0506	158.294	123.991	79.3891	69.1742	113.553
ENSBTAG00000006731	SLC7A5	solute carrier family 7 member 5 [Source:VGNC Symbol;Acc:VGNC:52250]		1.17198			1	26.3598	18.8141	13.9911	15.3721	19.4569	49.2092	50.5146	27.6148	23.901	36.2665
ENSBTAG00000008821	SEPHS1	selenophosphate synthetase 1 [Source:VGNC Symbol;Acc:VGNC:34448]		1.17349			1	12.0496	12.904	14.7842	14.847	12.5138	38.9813	28.6008	18.6226	15.8447	26.8173
ENSBTAG00000003692	UCP2	uncoupling protein 2 [Source:VGNC Symbol;Acc:VGNC:36641]		1.17389			1	415.496	159.066	200.474	491.208	392.379	652.364	528.513	528.328	426.863	497.981
ENSBTAG00000017826	SCLY	selenocysteine lyase [Source:VGNC Symbol;Acc:VGNC:55677]		1.17396			1	7.16999	5.3633	5.37352	11.511	12.2401	15.4452	16.8886	11.444	11.4613	10.1945
ENSBTAG00000017215	WDR76	WD repeat domain 76 [Source:VGNC Symbol;Acc:VGNC:36920]		1.17483			1	8.49271	5.5574	11.1852	15.1725	13.1451	21.0131	17.4901	19.8895	17.0116	19.7694
ENSBTAG00000024137	PTCH2	patched 2 [Source:VGNC Symbol;Acc:VGNC:33492]		1.17644			1	0.290601	0.230313	0.228791	0.228839	0.264138	0.806066	0.433255	0.225877	0.260081	0.590834
ENSBTAG00000008609	SEPTIN8	septin 8 [Source:VGNC Symbol;Acc:VGNC:34458]		1.17646			1	2.81853	5.01359	5.29864	4.05084	4.96304	8.84131	10.6372	3.45935	5.32694	10.0164
ENSBTAG00000014737	VEGFC	vascular endothelial growth factor C [Source:VGNC Symbol;Acc:VGNC:36785]		1.17729			1	1.79077	1.59201	1.19687	4.1902	2.58295	4.29151	4.17399	3.74521	2.78907	2.60205
ENSBTAG00000031731	HIGD1A	HIG1 domain family member 1A, mitochondrial [Source:NCBI gene;Acc:101907084]		1.17871			1	299.607	230.624	231.218	135.895	161.053	602.365	755.746	266.722	220.393	413.895
ENSBTAG00000034676	HIGD1A	HIG1 domain family member 1A, mitochondrial [Source:NCBI gene;Acc:100337355]		1.17871			1	299.607	230.624	231.218	135.895	161.053	602.365	755.746	266.722	220.393	413.895
ENSBTAG00000004046	DTX4	deltex E3 ubiquitin ligase 4 [Source:VGNC Symbol;Acc:VGNC:54867]		1.1804			1	0.360586	0.4278	0.484096	0.140397	0.232764	0.98586	1.30966	0.363856	0.363362	0.772881
ENSBTAG00000020282	DCTD	dCMP deaminase [Source:VGNC Symbol;Acc:VGNC:27927]		1.18062			1	3.31051	2.28281	4.65629	3.52555	3.29235	9.49471	7.02734	5.2766	5.33961	7.01096
ENSBTAG00000010101	BYSL	bystin like [Source:VGNC Symbol;Acc:VGNC:26611]		1.18079			1	4.46124	5.55995	6.14172	5.07147	5.10728	15.0403	13.99	6.76724	6.26628	9.54172
ENSBTAG00000016362	POU6F1	POU class 6 homeobox 1 [Source:VGNC Symbol;Acc:VGNC:33180]		1.18376			1	2.6785	2.97591	2.2709	2.59588	2.30048	7.03576	7.10192	2.33518	3.29344	4.80863
ENSBTAG00000047997	PRPS2	phosphoribosyl pyrophosphate synthetase 2 [Source:VGNC Symbol;Acc:VGNC:56950]		1.18434			1	9.01756	13.819	12.2468	14.0348	14.9627	31.6553	29.7144	19.9299	18.4414	22.8751
ENSBTAG00000039316	ZNF268	zinc finger protein 268 [Source:HGNC Symbol;Acc:HGNC:13061]		1.18914			1	3.14499	3.13512	3.06751	3.03111	3.88447	7.62704	7.18716	6.00043	4.08306	8.02511
ENSBTAG00000008429	LRP4	LDL receptor related protein 4 [Source:VGNC Symbol;Acc:VGNC:30992]		1.19783			1	4.92452	3.36703	5.70389	6.03423	3.5758	14.0206	9.8046	6.42793	4.24692	9.36609
ENSBTAG00000008124	GK	glycerol kinase [Source:NCBI gene;Acc:505987]		1.20008			1	40.0448	67.8163	64.1134	30.7075	25.01	126.372	130.482	39.0412	41.527	150.206
ENSBTAG00000008683	LDHA	lactate dehydrogenase A [Source:NCBI gene;Acc:281274]		1.20078			1	1456.14	1324.57	1674.71	857.538	1264.88	3078.69	4598.27	1536.45	2085.31	3425.32
ENSBTAG00000010577	PAICS	phosphoribosylaminoimidazole carboxylase, phosphoribosylaminoimidazole succinocarboxamide synthetase [Source:NCBI gene;Acc:404170]		1.2016			1	69.5605	68.0142	82.6595	95.8121	94.7098	196.163	183.404	121.294	111.519	157.156
ENSBTAG00000011614	PDE7A	phosphodiesterase 7A [Source:VGNC Symbol;Acc:VGNC:32685]		1.2045			1	14.4521	9.75231	12.442	21.5922	16.078	33.8027	24.8886	24.6473	20.9674	30.8067
ENSBTAG00000006374	NHP2	NHP2 ribonucleoprotein [Source:VGNC Symbol;Acc:VGNC:32070]		1.20779			1	15.2572	20.0188	29.8414	17.2609	18.2041	57.4484	43.5382	25.728	27.0986	47.9818
ENSBTAG00000048067	EPOP	elongin BC and polycomb repressive complex 2 associated protein [Source:VGNC Symbol;Acc:VGNC:28550]		1.20796			1	3.28843	5.03855	3.80641	2.65427	2.47296	12.8839	7.15524	3.581	2.27321	8.69262
ENSBTAG00000031950	RAB3IP	RAB3A interacting protein [Source:VGNC Symbol;Acc:VGNC:56227]		1.2094			1	4.31251	3.65124	2.91195	5.12057	4.22726	10.8514	9.43714	6.8475	4.37143	6.89481
ENSBTAG00000008552	PLXNA3	plexin A3 [Source:HGNC Symbol;Acc:HGNC:9101]		1.21275			1	2.35922	2.54929	2.09797	1.71448	1.77616	7.27828	6.73192	3.08661	2.81207	3.73246
ENSBTAG00000048565	BASP1	brain abundant membrane attached signal protein 1 [Source:NCBI gene;Acc:286842]		1.21542			1	28.2755	21.7141	43.9828	41.4989	33.4577	88.324	55.739	57.9198	38.85	77.5355
ENSBTAG00000049368	0	0		1.2195			1	2.3745	2.70447	3.3511	1.47099	1.05483	8.81662	6.16924	2.49202	1.48867	5.57274
ENSBTAG00000031500	SHMT2	serine hydroxymethyltransferase 2 [Source:VGNC Symbol;Acc:VGNC:34604]		1.22171			1	147.606	108.818	155.113	110.596	155.649	329.933	376.406	156.377	215.464	287.15
ENSBTAG00000049490	0	0		1.22192			1	5.59025	3.81275	5.30163	4.61588	6.59086	14.7744	13.6168	8.02707	7.34273	8.86723
ENSBTAG00000016185	ENAH	ENAH actin regulator [Source:VGNC Symbol;Acc:VGNC:59333]		1.22701			1	5.66338	3.78766	5.60029	8.23604	7.62521	12.8025	10.0224	9.52558	8.98726	13.497
ENSBTAG00000013869	SH3BP4	SH3 domain binding protein 4 [Source:VGNC Symbol;Acc:VGNC:34567]		1.22778			1	1.71405	1.34576	2.04052	2.02711	2.84396	4.0179	3.32921	2.45458	3.04175	4.97533
ENSBTAG00000013658	ERC1	ELKS/RAB6-interacting/CAST family member 1 [Source:VGNC Symbol;Acc:VGNC:28566]		1.23749			1	0.669754	0.798354	1.40052	1.10534	1.18365	2.81131	1.6228	1.7048	1.45752	2.35673
ENSBTAG00000054057	NRG1	neuregulin 1 [Source:NCBI gene;Acc:281361]		1.24133			1	0.834607	1.10703	1.03055	0.627015	0.596431	2.80242	2.08166	0.582787	0.976478	2.41843
ENSBTAG00000007900	FIS1	fission, mitochondrial 1 [Source:VGNC Symbol;Acc:VGNC:29014]		1.24303			1	1.08581	1.5345	1.53584	1.97167	1.55892	4.13921	3.49171	2.33133	1.75686	2.59994
ENSBTAG00000010998	CFLAR	CASP8 and FADD like apoptosis regulator [Source:VGNC Symbol;Acc:VGNC:27255]		1.24658			1	2.29333	5.13889	4.1078	5.67088	4.66137	8.99158	7.95656	6.95197	5.75834	10.2282
ENSBTAG00000010023	FAM107B	family with sequence similarity 107 member B [Source:VGNC Symbol;Acc:VGNC:57007]		1.24959			1	21.1156	29.8958	21.2406	15.7242	23.705	61.8696	55.571	26.9452	25.6083	61.1216
ENSBTAG00000019120	WDHD1	WD repeat and HMG-box DNA binding protein 1 [Source:VGNC Symbol;Acc:VGNC:36878]		1.25076			1	5.05107	4.41046	8.55876	10.8678	9.36255	15.5218	12.5159	13.6039	11.4928	16.0987
ENSBTAG00000017958	AHI1	Abelson helper integration site 1 [Source:VGNC Symbol;Acc:VGNC:53780]		1.252			1	2.32913	2.92188	3.28963	1.70594	1.8146	8.55727	7.51922	3.48783	2.26462	5.80862
ENSBTAG00000005984	DAAM1	dishevelled associated activator of morphogenesis 1 [Source:VGNC Symbol;Acc:VGNC:27862]		1.25476			1	4.98124	2.44013	2.67361	7.84031	7.14308	10.5431	9.14154	9.42036	7.9837	5.66194
ENSBTAG00000044150	UCK2	uridine-cytidine kinase 2 [Source:VGNC Symbol;Acc:VGNC:36635]		1.26699			1	11.7986	11.2577	19.1094	18.414	16.3421	35.2742	31.5552	24.1989	19.7587	33.1397
ENSBTAG00000002363	SESN2	sestrin 2 [Source:VGNC Symbol;Acc:VGNC:34489]		1.27496			1	26.7212	19.6369	11.81	19.4384	18.9853	56.2823	53.5018	31.8259	24.8914	33.055
ENSBTAG00000020757	PCBP2	poly(rC) binding protein 2 [Source:VGNC Symbol;Acc:VGNC:49069]		1.27528			1	2.51777	2.60746	2.05446	2.0926	3.49844	7.61663	6.21956	2.99883	3.09276	4.91449
ENSBTAG00000016206	MAOA	monoamine oxidase A [Source:VGNC Symbol;Acc:VGNC:31174]		1.27587			1	71.13	50.4123	54.3517	91.0731	103.573	179.466	184.955	104.459	116.683	97.7076
ENSBTAG00000003511	SLAIN1	SLAIN motif family member 1 [Source:VGNC Symbol;Acc:VGNC:56645]		1.27738			1	2.81019	3.09748	3.67509	4.17564	2.9255	10.2448	8.75731	5.96227	4.1419	6.08004
ENSBTAG00000004992	TNPO3	transportin 3 [Source:VGNC Symbol;Acc:VGNC:36201]		1.27744			1	0.920524	0.677579	0.563586	0.795735	1.06246	2.14758	1.78157	2.01312	1.2599	1.64188
ENSBTAG00000038990	TRAF4	TNF receptor associated factor 4 [Source:VGNC Symbol;Acc:VGNC:36276]		1.27904			1	2.13724	1.80947	1.45271	2.13427	2.21725	5.81516	4.16741	2.8137	2.26521	3.79925
ENSBTAG00000011516	LRP12	LDL receptor related protein 12 [Source:VGNC Symbol;Acc:VGNC:30989]		1.28538			1	4.89482	4.51833	3.57676	2.73225	2.12278	9.39481	9.89403	4.23389	4.37973	14.2485
ENSBTAG00000001543	BRI3BP	BRI3 binding protein [Source:VGNC Symbol;Acc:VGNC:26565]		1.29037			1	5.21309	4.02002	7.24149	7.31754	5.22812	13.7697	10.7977	8.20814	5.47502	15.5577
ENSBTAG00000025320	AKAP1	A-kinase anchoring protein 1 [Source:VGNC Symbol;Acc:VGNC:25779]		1.30407			1	11.8345	9.5074	10.4249	15.1076	15.7476	35.9606	30.5043	23.8561	19.0696	18.0938
ENSBTAG00000015127	SDC4	syndecan 4 [Source:VGNC Symbol;Acc:VGNC:34381]		1.30413			1	23.0573	22.0143	35.309	22.1698	17.9512	75.2134	74.4652	38.3941	26.174	55.0529
ENSBTAG00000016494	RELT	RELT TNF receptor [Source:VGNC Symbol;Acc:VGNC:33862]		1.30633			1	5.96921	4.35944	5.48452	6.801	7.27355	18.8086	13.6334	11.885	7.94583	9.30033
ENSBTAG00000050334	CD83	CD83 molecule [Source:NCBI gene;Acc:617034]		1.30726			1	47.2057	41.7545	24.7351	28.4904	19.6389	110.626	107.903	34.4037	24.6398	72.3607
ENSBTAG00000007743	PUS7	pseudouridine synthase 7 [Source:VGNC Symbol;Acc:VGNC:54567]		1.31007			1	2.83632	3.86329	5.47102	4.14956	4.27225	12.6818	10.5386	6.58829	5.88686	8.29777
ENSBTAG00000017493	JADE1	jade family PHD finger 1 [Source:VGNC Symbol;Acc:VGNC:30358]		1.31113			1	3.26964	1.99384	1.94579	2.26809	2.74049	8.99836	4.535	4.75551	3.03444	5.39743
ENSBTAG00000002329	ASAP2	ArfGAP with SH3 domain, ankyrin repeat and PH domain 2 [Source:VGNC Symbol;Acc:VGNC:26185]		1.31237			1	1.65855	1.64479	2.31541	2.51057	1.8887	6.22437	3.7686	3.83293	1.92827	4.7216
ENSBTAG00000005344	GNPNAT1	glucosamine-phosphate N-acetyltransferase 1 [Source:VGNC Symbol;Acc:VGNC:29478]		1.31313			1	13.8327	17.7797	18.2143	19.6197	18.9976	47.3519	50.2944	23.5491	19.6155	32.7826
ENSBTAG00000027809	RABGAP1L	RAB GTPase activating protein 1-like [Source:NCBI gene;Acc:527428]		1.31974			1	1.95865	2.1607	2.6646	2.65993	3.42666	7.61603	6.64205	3.69615	3.23592	4.45039
ENSBTAG00000001564	PDE4DIP	phosphodiesterase 4D interacting protein [Source:VGNC Symbol;Acc:VGNC:55072]		1.32125			1	17.0215	11.9948	12.5459	14.3632	10.1803	44.9495	39.2863	23.8558	16.7622	26.2789
ENSBTAG00000011866	PCBD1	pterin-4 alpha-carbinolamine dehydratase 1 [Source:VGNC Symbol;Acc:VGNC:32612]		1.32389			1	7.51046	7.12122	9.56878	9.60393	10.1801	27.3457	22.5205	12.847	12.0996	14.6811
ENSBTAG00000040551	ZBTB1	zinc finger and BTB domain containing 1 [Source:VGNC Symbol;Acc:VGNC:37057]		1.32716			1	9.16089	13.6033	6.58027	13.5446	7.66531	27.9116	25.8141	12.8352	13.6558	22.9758
ENSBTAG00000038306	CBX2	chromobox 2 [Source:VGNC Symbol;Acc:VGNC:26817]		1.3277			1	2.83468	1.84467	3.65282	2.69114	2.19524	9.57005	6.10776	4.26153	3.01636	5.82318
ENSBTAG00000049233	0	transmembrane protein 123 [Source:NCBI gene;Acc:100300021]		1.32799			1	66.8996	65.4927	53.6594	96.6822	88.8766	194.419	174.998	113.93	107.252	125.381
ENSBTAG00000002348	SLC4A4	solute carrier family 4 member 4 [Source:VGNC Symbol;Acc:VGNC:34894]		1.3326			1	1.55898	0.603127	0.768166	0.752713	0.792655	2.79251	2.13404	0.712756	0.889145	2.28303
ENSBTAG00000006022	ATP6V0E2	ATPase H+ transporting V0 subunit e2 [Source:VGNC Symbol;Acc:VGNC:26315]		1.33279			1	2.40804	2.10528	2.03677	2.60696	2.47176	7.73102	5.8206	3.8951	3.06379	4.20398
ENSBTAG00000012252	MOCOS	molybdenum cofactor sulfurase [Source:VGNC Symbol;Acc:VGNC:31547]		1.33436			1	1.8783	2.29469	1.27538	4.40379	4.84098	5.37236	6.65393	4.95725	5.6902	2.92437
ENSBTAG00000013264	RPS24	ribosomal protein S24 [Source:NCBI gene;Acc:530464]		1.33607			1	8.42214	7.5286	7.72604	11.8041	6.80709	27.9291	18.5903	15.4765	8.57475	17.3567
ENSBTAG00000047319	0	0		1.34645			1	20.5214	11.6866	16.1418	29.6304	36.6267	43.0028	50.5207	32.2881	39.5154	29.9496
ENSBTAG00000021658	GRASP	general receptor for phosphoinositides 1 associated scaffold protein [Source:VGNC Symbol;Acc:VGNC:29628]		1.34665			1	1.071	1.10641	1.25638	0.270855	0.402982	4.47631	2.72367	1.12424	0.74776	2.25085
ENSBTAG00000011473	MYL9	myosin light chain 9 [Source:VGNC Symbol;Acc:VGNC:57010]		1.34839			1	29.1017	29.803	38.6617	26.1172	28.5927	106.506	93.4033	50.3969	40.5189	60.5845
ENSBTAG00000008329	CYTIP	cytohesin 1 interacting protein [Source:VGNC Symbol;Acc:VGNC:49051]		1.34922			1	30.1818	32.4367	29.8418	55.417	42.5749	97.4497	100.041	63.8639	52.0654	59.8589
ENSBTAG00000005517	NOP58	NOP58 ribonucleoprotein [Source:VGNC Symbol;Acc:VGNC:32170]		1.34936			1	36.1371	46.5911	41.4939	50.4189	47.5288	122.478	120.184	71.8324	59.7836	94.5253
ENSBTAG00000017460	PRORSD1	prdX-deacylase domain-containing protein 1 [Source:NCBI gene;Acc:526913]		1.35281			1	2.51406	1.72255	3.22042	3.59134	3.23005	7.89705	5.73019	4.55722	3.88402	5.84601
ENSBTAG00000012955	TRUB1	TruB pseudouridine synthase family member 1 [Source:VGNC Symbol;Acc:VGNC:36404]		1.35771			1	1.48852	1.63807	2.84002	2.53638	2.31341	6.49772	5.12844	4.20005	2.15665	4.14144
ENSBTAG00000011079	C18H19orf48	chromosome 18 C19orf48 homolog [Source:NCBI gene;Acc:516719]		1.35951			1	2.78672	2.74005	5.02484	3.05533	3.10937	11.8021	8.88223	4.86413	3.66252	6.85488
ENSBTAG00000015511	FADS3	fatty acid desaturase 3 [Source:VGNC Symbol;Acc:VGNC:28703]		1.37128			1	7.50979	14.8623	14.2986	7.03554	5.48701	37.171	30.2859	11.5733	8.82683	26.9237
ENSBTAG00000034827	PDGFD	platelet derived growth factor D [Source:VGNC Symbol;Acc:VGNC:32691]		1.37189			1	1.20008	1.80355	2.3241	1.01042	0.73526	5.60157	4.56137	1.64561	1.21909	3.83969
ENSBTAG00000026111	LBH	LBH regulator of WNT signaling pathway [Source:NCBI gene;Acc:616148]		1.37538			1	3.1699	6.01579	7.30734	5.99429	4.52607	16.3468	13.3991	9.00359	5.39004	12.4864
ENSBTAG00000022155	FSTL1	follistatin like 1 [Source:VGNC Symbol;Acc:VGNC:29135]		1.38134			1	3.17021	1.51459	2.73706	0.651631	0.579206	6.93169	7.59749	0.751578	0.494253	5.24356
ENSBTAG00000013664	FILIP1L	filamin A interacting protein 1 like [Source:VGNC Symbol;Acc:VGNC:29013]		1.3832			1	1.99484	3.94398	1.49992	3.44668	2.93632	6.81996	6.65835	3.64382	3.3378	5.69183
ENSBTAG00000001770	ST8SIA5	ST8 alpha-N-acetyl-neuraminide alpha-2,8-sialyltransferase 5 [Source:VGNC Symbol;Acc:VGNC:54494]		1.38326			1	1.53114	2.20764	1.65007	0.562905	0.433306	6.51472	5.19068	0.838163	0.565392	3.35757
ENSBTAG00000000629	MMS22L	MMS22 like, DNA repair protein [Source:VGNC Symbol;Acc:VGNC:31535]		1.3857			1	1.37379	1.63663	3.94403	3.33083	3.92465	5.77167	4.88113	5.72299	5.20507	6.71853
ENSBTAG00000021921	STRBP	spermatid perinuclear RNA binding protein [Source:VGNC Symbol;Acc:VGNC:35421]		1.39579			1	1.33668	1.078	1.47245	1.14148	1.09905	2.77312	4.34254	1.89976	2.03722	3.68842
ENSBTAG00000020860	CHD1	chromodomain helicase DNA binding protein 1 [Source:VGNC Symbol;Acc:VGNC:27276]		1.39891			1	4.89473	4.37332	2.95415	5.47469	4.04015	10.0563	10.5152	4.19392	6.60414	13.3741
ENSBTAG00000044105	FOXO1	forkhead box O1 [Source:VGNC Symbol;Acc:VGNC:29098]		1.40563			1	2.13732	1.88614	1.86337	1.02276	0.768736	8.01254	5.15219	2.15527	1.26806	3.97871
ENSBTAG00000018131	ATF1	activating transcription factor 1 [Source:VGNC Symbol;Acc:VGNC:26239]		1.41047			1	5.46373	6.49692	4.80876	6.23765	5.84216	14.5529	17.6656	8.96391	9.72974	14.4988
ENSBTAG00000008711	BOK	BCL2 family apoptosis regulator BOK [Source:VGNC Symbol;Acc:VGNC:26538]		1.41277			1	1.64952	2.41446	3.13942	0.979629	1.14909	8.80703	6.61714	2.6271	1.50241	4.32178
ENSBTAG00000019434	PDCD4	programmed cell death 4 [Source:VGNC Symbol;Acc:VGNC:32661]		1.41628			1	12.743	16.6184	18.2014	22.0415	16.3599	36.0807	44.4598	21.551	33.4483	53.5337
ENSBTAG00000005304	SRM	spermidine synthase [Source:VGNC Symbol;Acc:VGNC:35282]		1.41641			1	3.10395	3.64745	5.95763	3.87378	5.13654	12.7242	9.11829	7.20743	5.41567	11.8171
ENSBTAG00000037679	PPP1R3E	protein phosphatase 1 regulatory subunit 3E [Source:VGNC Symbol;Acc:VGNC:33246]		1.42475			1	3.94436	7.07899	6.79438	3.9364	4.35294	18.677	17.0146	6.01206	5.74072	12.9151
ENSBTAG00000013960	PSAT1	phosphoserine aminotransferase 1 [Source:VGNC Symbol;Acc:VGNC:55075]		1.42621			1	169.336	134.659	97.9719	181.696	197.414	476.992	511.277	330.772	285.033	210.525
ENSBTAG00000020936	NOD2	nucleotide binding oligomerization domain containing 2 [Source:VGNC Symbol;Acc:VGNC:32151]		1.43058			1	12.2474	5.87811	5.53313	11.9391	12.2041	25.0279	23.2734	16.7422	15.7053	15.6639
ENSBTAG00000018577	SLC7A1	solute carrier family 7 member 1 [Source:VGNC Symbol;Acc:VGNC:34924]		1.4356			1	36.4651	17.6116	18.1436	26.396	20.8778	80.0092	63.6506	44.9782	31.6836	51.6102
ENSBTAG00000015981	ETV1	ETS variant 1 [Source:VGNC Symbol;Acc:VGNC:28628]		1.43806			1	2.09711	1.69032	0.898935	1.36181	0.783844	4.62943	3.85877	2.71499	2.25746	4.25002
ENSBTAG00000044097	KLF7	Kruppel like factor 7 [Source:VGNC Symbol;Acc:VGNC:50537]		1.44503			1	4.1333	5.19322	3.86878	4.24567	3.38616	16.1291	13.1231	6.22069	3.83955	9.05844
ENSBTAG00000015113	CITED4	Cbp/p300 interacting transactivator with Glu/Asp rich carboxy-terminal domain 4 [Source:VGNC Symbol;Acc:VGNC:27378]		1.45376			1	3.01656	3.20654	3.87577	3.26952	2.89276	9.90248	8.42083	3.18174	2.78345	9.51096
ENSBTAG00000016010	KLHL7	kelch like family member 7 [Source:NCBI gene;Acc:534697]		1.4637			1	19.0315	13.3332	9.19878	14.4279	16.3053	49.6646	58.7576	28.3893	24.3908	21.4163
ENSBTAG00000045744	NKRF	NFKB repressing factor [Source:VGNC Symbol;Acc:VGNC:52805]		1.46659			1	0.989808	1.17642	0.675492	0.782813	1.43434	2.20414	3.32333	1.21943	1.26516	2.80034
ENSBTAG00000052956	0	0		1.46808			1	183.564	181.718	138.266	325.666	315.961	597.619	629.511	373.091	318.968	261.392
ENSBTAG00000014368	SLAMF6	SLAM family member 6 [Source:VGNC Symbol;Acc:VGNC:34654]		1.46846			1	40.5361	34.4184	39.0172	47.6909	65.2794	92.4432	169.834	77.1548	94.4393	91.0946
ENSBTAG00000005339	VEGFA	vascular endothelial growth factor A [Source:VGNC Symbol;Acc:VGNC:55927]		1.47508			1	20.511	9.52277	10.5318	7.189	10.3544	41.5288	42.8513	17.0289	18.058	27.3454
ENSBTAG00000015441	ACTG2	actin gamma 2, smooth muscle [Source:VGNC Symbol;Acc:VGNC:59201]		1.48539			1	1.89762	2.69488	1.96922	1.7707	2.22354	6.92481	4.67859	2.16881	3.27445	7.95887
ENSBTAG00000003313	TNFRSF9	TNF receptor superfamily member 9 [Source:VGNC Symbol;Acc:VGNC:36171]		1.4861			1	0.932575	0.736363	0.515734	0.736883	0.761608	2.43273	2.34345	2.59805	1.76243	1.71645
ENSBTAG00000020136	CASK	calcium/calmodulin dependent serine protein kinase [Source:VGNC Symbol;Acc:VGNC:26776]		1.49106			1	2.59331	1.90552	2.66318	3.24521	2.58812	7.83159	7.41595	3.83732	3.42091	6.05416
ENSBTAG00000005534	ENO3	enolase 3 [Source:VGNC Symbol;Acc:VGNC:28498]		1.49112			1	1.87584	1.64742	1.3942	3.38945	2.83971	7.55666	2.82838	3.34443	2.64879	5.15766
ENSBTAG00000002953	TXN	thioredoxin [Source:VGNC Symbol;Acc:VGNC:56751]		1.49531			1	984.137	1076.55	1065.63	1124.49	863.305	3627.55	3436.06	1835.75	1424.75	2228.04
ENSBTAG00000014549	GNL3	G protein nucleolar 3 [Source:VGNC Symbol;Acc:VGNC:29473]		1.49809			1	12.7638	19.9191	23.3304	21.9562	24.0915	60.2783	61.0708	34.4901	27.4032	42.8158
ENSBTAG00000053910	C17orf58	chromosome 19 C17orf58 homolog [Source:NCBI gene;Acc:100301295]		1.49835			1	2.24666	1.02104	1.92633	2.6718	2.06618	5.35239	4.28892	3.37492	3.14318	5.14471
ENSBTAG00000011187	FAM13A	family with sequence similarity 13 member A [Source:VGNC Symbol;Acc:VGNC:28731]		1.49995			1	0.870224	0.348822	0.583509	0.823527	0.386503	1.97416	1.47908	0.76403	0.7414	1.6312
ENSBTAG00000019984	GINS1	GINS complex subunit 1 [Source:VGNC Symbol;Acc:VGNC:29360]		1.50032			1	5.95111	4.23087	13.0478	15.3428	14.2807	22.4086	17.8753	19.4225	17.0383	21.8052
ENSBTAG00000009617	SLC2A1	solute carrier family 2 member 1 [Source:VGNC Symbol;Acc:VGNC:34796]		1.50435			1	26.1879	37.2381	30.8327	15.1865	19.7843	99.0442	112.991	28.8279	30.0051	69.4508
ENSBTAG00000018518	RASL10B	RAS like family 10 member B [Source:VGNC Symbol;Acc:VGNC:33753]		1.51007			1	1.12807	1.44922	2.05811	2.18749	2.22661	5.77151	3.63958	3.08661	2.25499	3.89986
ENSBTAG00000006017	NFKB2	nuclear factor kappa B subunit 2 [Source:VGNC Symbol;Acc:VGNC:32044]		1.51592			1	19.846	11.9077	11.1155	12.1748	11.1684	53.7363	48.8965	27.2657	19.5531	26.356
ENSBTAG00000007014	CEP63	centrosomal protein 63 [Source:VGNC Symbol;Acc:VGNC:27209]		1.52363			1	2.49548	1.53218	1.77492	4.23871	3.26622	5.61806	6.90925	4.97574	2.61769	4.98551
ENSBTAG00000018410	EBPL	EBP like [Source:VGNC Symbol;Acc:VGNC:28300]		1.52993			1	1.7058	2.13232	1.95038	3.14889	2.85534	5.98583	4.95806	3.16355	3.53912	6.20701
ENSBTAG00000033174	TFAP4	transcription factor AP-4 [Source:VGNC Symbol;Acc:VGNC:35781]		1.53147			1	1.17139	0.802381	0.858631	1.21882	1.15961	3.54077	3.13894	1.88977	1.67154	1.99076
ENSBTAG00000018773	RND1	Rho family GTPase 1 [Source:VGNC Symbol;Acc:VGNC:34004]		1.53626			1	0.68247	0.380364	0.32881	0.279474	0.411706	1.65289	1.60246	0.521022	0.447326	0.945018
ENSBTAG00000003733	TM4SF5	transmembrane 4 L six family member 5 [Source:VGNC Symbol;Acc:VGNC:35907]		1.54503			1	5.87888	5.25761	4.67308	4.994	6.27316	21.4516	14.1212	5.13372	5.12705	13.1917
ENSBTAG00000033669	IL17RC	interleukin 17 receptor C [Source:VGNC Symbol;Acc:VGNC:30123]		1.54515			1	3.36432	2.68544	4.24884	5.53253	4.96816	10.2592	12.4231	5.43534	5.67493	8.25727
ENSBTAG00000032534	RHOF	ras homolog family member F, filopodia associated [Source:VGNC Symbol;Acc:VGNC:33948]		1.55287			1	2.01238	2.11039	1.51562	1.44872	1.56593	8.51202	6.04702	2.86121	1.73359	3.7562
ENSBTAG00000000653	PPP1R16B	protein phosphatase 1 regulatory subunit 16B [Source:VGNC Symbol;Acc:VGNC:33231]		1.55412			1	1.87379	2.34692	0.980634	1.00507	0.977931	7.28911	5.69981	2.70064	1.6923	3.18919
ENSBTAG00000038428	RELB	RELB proto-oncogene, NF-kB subunit [Source:VGNC Symbol;Acc:VGNC:33859]		1.55567			1	8.14457	5.74535	4.19963	7.87402	8.62017	25.3188	23.1592	12.9727	10.5317	9.73864
ENSBTAG00000004256	ODC1	ornithine decarboxylase 1 [Source:NCBI gene;Acc:281365]		1.55738			1	25.3566	27.6103	27.5648	24.4813	26.1069	98.2617	81.4538	45.7059	40.3803	72.1094
ENSBTAG00000007847	EED	embryonic ectoderm development [Source:VGNC Symbol;Acc:VGNC:28332]		1.55887			1	27.7904	32.2757	33.2934	39.4457	37.4213	120.102	103.731	59.5416	50.9353	76.8973
ENSBTAG00000051164	WDR35	WD repeat domain 35 [Source:NCBI gene;Acc:100337107]		1.562			1	1.68479	0.856771	1.5937	2.22921	1.88323	4.75001	3.37541	1.81878	2.17474	4.50424
ENSBTAG00000005218	PDE3B	phosphodiesterase 3B [Source:VGNC Symbol;Acc:VGNC:32675]		1.56726			1	2.69772	2.00226	2.76478	1.82809	1.71449	9.16814	7.73141	3.39362	2.42099	6.38287
ENSBTAG00000011798	STK38L	serine/threonine kinase 38 like [Source:VGNC Symbol;Acc:VGNC:35400]		1.56818			1	12.8671	14.7691	12.005	20.0518	18.1738	43.3292	50.5062	27.7096	25.2362	32.3714
ENSBTAG00000015386	REL	REL proto-oncogene, NF-kB subunit [Source:VGNC Symbol;Acc:VGNC:33857]		1.57026			1	16.3408	32.0925	10.7877	17.9121	17.5684	67.3571	72.2576	24.5063	20.8924	37.5889
ENSBTAG00000037757	EBF4	EBF family member 4 [Source:VGNC Symbol;Acc:VGNC:28298]		1.57056			1	1.92193	0.937528	1.18975	2.19885	1.2856	5.3782	3.76031	2.53708	2.0944	3.20244
ENSBTAG00000021204	TES	testin LIM domain protein [Source:VGNC Symbol;Acc:VGNC:35752]		1.57116			1	11.6992	9.57974	13.5951	24.0068	13.7242	41.9832	31.5929	28.5773	17.3937	35.146
ENSBTAG00000021294	VWA1	von Willebrand factor A domain containing 1 [Source:VGNC Symbol;Acc:VGNC:36850]		1.57469			1	2.27092	1.45737	1.41203	0.905236	1.17302	6.94378	5.96467	1.90296	1.48917	3.37991
ENSBTAG00000049851	PMAIP1	phorbol-12-myristate-13-acetate-induced protein 1 [Source:NCBI gene;Acc:100296226]		1.57698			1	59.6728	99.9029	35.2794	21.8159	25.7704	223.112	216.513	74.3091	45.9802	116.404
ENSBTAG00000021145	MAP4K1	mitogen-activated protein kinase kinase kinase kinase 1 [Source:VGNC Symbol;Acc:VGNC:31204]		1.57912			1	3.12986	1.61664	2.56887	3.58066	2.90482	9.63534	6.13689	5.78622	4.81497	6.54701
ENSBTAG00000050712	EHD1	EH domain containing 1 [Source:NCBI gene;Acc:511908]		1.57925			1	12.1948	8.56622	10.1749	11.5463	12.5909	41.0638	36.6319	21.7446	17.9011	21.1507
ENSBTAG00000011934	PCK2	phosphoenolpyruvate carboxykinase 2, mitochondrial [Source:VGNC Symbol;Acc:VGNC:32632]		1.59017			1	136.046	50.4999	60.9961	90.254	92.6882	333.55	298.464	169.922	140.609	131.671
ENSBTAG00000008441	SOCS3	suppressor of cytokine signaling 3 [Source:VGNC Symbol;Acc:VGNC:35121]		1.59162			1	11.0874	22.4894	19.2847	16.1755	15.7327	45.5155	56.4846	22.5583	17.0746	51.4693
ENSBTAG00000005092	ROR2	receptor tyrosine kinase like orphan receptor 2 [Source:VGNC Symbol;Acc:VGNC:34087]		1.59855			1	1.62939	1.31123	2.02417	2.03673	3.73442	4.81143	7.97867	3.14013	3.85064	3.51546
ENSBTAG00000014831	PPP1R3C	protein phosphatase 1 regulatory subunit 3C [Source:VGNC Symbol;Acc:VGNC:33244]		1.59913			1	16.7172	9.13061	9.13372	7.53156	7.02264	38.3619	40.8505	11.0828	11.1773	29.9209
ENSBTAG00000014261	TARS1	threonyl-tRNA synthetase 1 [Source:VGNC Symbol;Acc:VGNC:35605]		1.59916			1	232.7	142.485	155.312	275.787	222.652	661.085	668.158	420.512	336.504	387.53
ENSBTAG00000010727	ATG4D	autophagy related 4D cysteine peptidase [Source:VGNC Symbol;Acc:VGNC:26260]		1.60551			1	10.8738	12.7277	9.02499	8.66157	8.04968	48.4484	35.3651	11.1127	9.11763	22.371
ENSBTAG00000004881	MTHFD2	methylenetetrahydrofolate dehydrogenase (NADP+ dependent) 2, methenyltetrahydrofolate cyclohydrolase [Source:NCBI gene;Acc:517539]		1.60797			1	52.7474	27.4814	27.9193	65.7269	54.5578	133.813	131.357	96.2998	71.9013	80.0257
ENSBTAG00000014922	SHB	SH2 domain containing adaptor protein B [Source:VGNC Symbol;Acc:VGNC:34588]		1.61406			1	0.688965	0.344733	0.574109	0.453719	0.252331	2.33538	1.34137	0.740037	0.429632	1.38812
ENSBTAG00000016335	NPM3	nucleophosmin/nucleoplasmin 3 [Source:VGNC Symbol;Acc:VGNC:32208]		1.62542			1	2.76707	4.636	7.70086	4.26075	5.76718	15.2448	14.2975	6.46265	8.15021	14.5779
ENSBTAG00000026326	SPN	sialophorin [Source:VGNC Symbol;Acc:VGNC:35224]		1.62573			1	50.9943	49.5837	38.2551	32.1953	27.7798	223.533	143.165	78.1292	56.3111	103.426
ENSBTAG00000026234	STK3	serine/threonine kinase 3 [Source:VGNC Symbol;Acc:VGNC:35393]		1.62852			1	2.41019	1.45747	2.64286	1.12917	1.04876	7.02335	5.07549	2.88751	2.95851	8.99642
ENSBTAG00000044029	AVEN	apoptosis and caspase activation inhibitor [Source:VGNC Symbol;Acc:VGNC:26353]		1.63707			1	1.70496	0.764347	2.59996	1.59097	1.4159	4.98287	4.28208	2.94117	2.68974	5.30109
ENSBTAG00000005523	XYLT1	xylosyltransferase 1 [Source:VGNC Symbol;Acc:VGNC:37012]		1.64408			1	2.80493	2.08703	2.87496	1.71783	1.18933	10.8623	9.436	4.15376	2.97473	5.58764
ENSBTAG00000021237	DST	dystonin [Source:NCBI gene;Acc:535297]		1.64985			1	1.64891	1.58737	1.45523	1.23423	0.638538	6.85805	5.60688	1.57658	1.12423	3.53636
ENSBTAG00000007125	AFMID	arylformamidase [Source:VGNC Symbol;Acc:VGNC:25716]		1.67214			1	2.86388	2.16825	1.9546	1.61422	2.2896	11.1669	5.7655	4.09583	3.19104	6.96398
ENSBTAG00000012927	ALDOA	aldolase, fructose-bisphosphate A [Source:VGNC Symbol;Acc:VGNC:25821]		1.68778			1	62.4462	56.8092	95.396	31.9992	35.6771	258.802	198.066	66.2578	67.358	248.983
ENSBTAG00000051245	SOX4	SRY-box transcription factor 4 [Source:NCBI gene;Acc:768313]		1.69194			1	1.24718	1.2759	1.5648	1.00218	0.600591	7.96214	3.86566	2.2561	1.1141	3.02644
ENSBTAG00000014030	FGD6	FYVE, RhoGEF and PH domain containing 6 [Source:VGNC Symbol;Acc:VGNC:28969]		1.698			1	0.807317	0.989656	0.618146	0.767276	0.640397	3.25022	2.8666	1.45921	0.770895	2.22148
ENSBTAG00000020566	BCR	BCR activator of RhoGEF and GTPase [Source:VGNC Symbol;Acc:VGNC:56808]		1.70128			1	0.651525	0.260391	0.548639	0.668906	0.751911	1.92717	1.12269	1.20997	0.750957	1.59873
ENSBTAG00000052466	0	0		1.70239			1	15.8282	21.1499	20.186	19.1757	19.2749	78.1162	68.8762	28.9083	26.8665	48.9994
ENSBTAG00000011215	ACTN4	actinin alpha 4 [Source:VGNC Symbol;Acc:VGNC:25583]		1.71929			1	1.05297	1.12531	2.97183	1.5748	0.814243	4.98761	5.3474	1.08193	1.78906	4.97893
ENSBTAG00000014536	SFXN1	sideroflexin 1 [Source:VGNC Symbol;Acc:VGNC:34530]		1.72474			1	6.90302	3.89472	10.2599	10.3102	11.2915	23.3481	21.2166	15.0081	13.6056	24.0679
ENSBTAG00000007121	TK1	thymidine kinase 1 [Source:VGNC Symbol;Acc:VGNC:35884]		1.73591			1	13.6866	11.8895	21.7795	26.5048	23.509	73.4161	39.0572	39.2813	28.3628	50.4256
ENSBTAG00000024291	FAM71F2	family with sequence similarity 71 member F2 [Source:VGNC Symbol;Acc:VGNC:50126]		1.73608			1	1.95349	3.06562	4.11216	1.3761	1.32	9.23272	9.65778	2.13004	1.85305	11.4077
ENSBTAG00000020355	KLF4	Kruppel like factor 4 [Source:VGNC Symbol;Acc:VGNC:52790]		1.74014			1	18.6952	7.20589	8.99348	10.7268	12.0256	47.3086	42.1327	21.009	16.2901	25.7896
ENSBTAG00000046569	CISD3	CDGSH iron sulfur domain 3 [Source:VGNC Symbol;Acc:VGNC:27373]		1.7476			1	7.44941	13.0679	10.6944	4.93588	9.11405	39.3282	24.3181	15.3035	13.9186	42.4684
ENSBTAG00000015743	GMPR	guanosine monophosphate reductase [Source:VGNC Symbol;Acc:VGNC:29442]		1.75704			1	0.387781	0.91183	0.727348	0.398688	0.508047	2.13469	2.03008	0.570086	0.411581	2.60085
ENSBTAG00000008216	RRM2	ribonucleotide reductase regulatory subunit M2 [Source:VGNC Symbol;Acc:VGNC:34165]		1.76089			1	49.7029	20.5758	51.7377	101.158	72.74	168.311	92.906	133.207	85.672	161.418
ENSBTAG00000007763	SLC1A4	solute carrier family 1 member 4 [Source:VGNC Symbol;Acc:VGNC:34714]		1.76407			1	29.1529	11.1224	12.7388	22.0418	18.9667	69.5055	68.7025	42.4969	31.1195	39.8512
ENSBTAG00000014506	ZNF503	zinc finger protein 503 [Source:VGNC Symbol;Acc:VGNC:37288]		1.76593			1	1.72428	1.61814	1.04051	1.66904	1.63369	6.35178	5.24867	2.29889	1.8815	3.84497
ENSBTAG00000005504	TP53INP2	tumor protein p53 inducible nuclear protein 2 [Source:VGNC Symbol;Acc:VGNC:36237]		1.76865			1	2.45989	2.57152	1.37609	1.2706	2.63756	10.2111	7.39104	4.71131	4.10992	5.35552
ENSBTAG00000007084	MAP3K14	mitogen-activated protein kinase kinase kinase 14 [Source:VGNC Symbol;Acc:VGNC:31192]		1.76869			1	9.94747	5.19924	6.87571	11.9306	10.5109	34.427	25.2251	16.8312	12.1789	18.19
ENSBTAG00000018316	ZMYND15	zinc finger MYND-type containing 15 [Source:VGNC Symbol;Acc:VGNC:37204]		1.7717			1	2.56381	2.31584	1.50128	1.52604	1.49032	11.2466	6.55903	2.44958	1.7404	5.56333
ENSBTAG00000038366	CD1B5	T-cell surface glycoprotein CD1b-1-like [Source:NCBI gene;Acc:521663]		1.77329			1	3.85744	3.45905	3.37605	3.57971	3.01606	24.6375	11.7475	6.57924	4.14241	7.63742
ENSBTAG00000003018	FSTL3	follistatin like 3 [Source:VGNC Symbol;Acc:VGNC:29136]		1.77683			1	1.39774	0.69644	1.1188	0.295996	0.657838	4.48546	3.26364	0.810141	0.742201	3.37584
ENSBTAG00000052337	RPS29	ribosomal protein S29 [Source:NCBI gene;Acc:286884]		1.77756			1	0.924353	1.48042	1.20158	2.22412	2.62209	5.73455	4.27523	4.30402	2.38114	3.37686
ENSBTAG00000009641	MTHFD1	methylenetetrahydrofolate dehydrogenase, cyclohydrolase and formyltetrahydrofolate synthetase 1 [Source:VGNC Symbol;Acc:VGNC:31730]		1.78139			1	25.3843	18.1993	35.3485	36.7251	28.9418	120.183	73.2598	59.9123	42.6422	88.1114
ENSBTAG00000002473	ANGPTL4	angiopoietin like 4 [Source:VGNC Symbol;Acc:VGNC:25893]		1.79029			1	2.12778	2.17232	5.27175	3.60873	4.13289	12.9736	9.63844	3.79269	4.45544	8.74491
ENSBTAG00000005501	COBLL1	cordon-bleu WH2 repeat protein like 1 [Source:NCBI gene;Acc:532067]		1.79608			1	2.2291	1.1598	1.53057	3.37268	3.00216	6.92776	6.10453	4.45362	3.24875	4.68139
ENSBTAG00000001161	SINHCAF	SIN3-HDAC complex associated factor [Source:VGNC Symbol;Acc:VGNC:34626]		1.79785			1	8.83812	8.83607	8.56352	10.8392	9.59223	37.1229	40.6537	19.6977	16.452	23.3248
ENSBTAG00000050474	RUNX3	RUNX family transcription factor 3 [Source:NCBI gene;Acc:617389]		1.80338			1	1.91843	2.46572	1.86937	3.44448	3.55076	10.7584	8.40162	5.04722	3.65983	4.77111
ENSBTAG00000005760	TBC1D4	TBC1 domain family member 4 [Source:VGNC Symbol;Acc:VGNC:35644]		1.80985			1	12.0403	7.40508	8.74595	12.2924	12.3616	39.4704	36.5095	16.9531	15.7359	27.7174
ENSBTAG00000021372	SEPTIN11	septin 11 [Source:VGNC Symbol;Acc:VGNC:34451]		1.8381			1	7.58941	4.82528	7.67929	11.8428	9.74425	33.4689	24.2199	18.6573	13.4456	18.9762
ENSBTAG00000001252	HIVEP1	HIVEP zinc finger 1 [Source:NCBI gene;Acc:529115]		1.84366			1	1.08329	0.804772	0.638886	0.469876	0.399202	3.74929	3.85907	0.997771	0.762699	2.07075
ENSBTAG00000040088	SLC9B2	solute carrier family 9 member B2 [Source:VGNC Symbol;Acc:VGNC:34948]		1.84864			1	0.237845	0.474997	0.632823	0.605029	0.297999	2.1411	1.41275	0.929679	0.65773	1.36385
ENSBTAG00000018446	GCA	grancalcin [Source:VGNC Symbol;Acc:VGNC:29278]		1.84961			1	3.63849	3.13433	2.37814	3.70267	2.92414	13.468	13.5997	6.25619	5.53797	8.71463
ENSBTAG00000012241	POLD2	DNA polymerase delta 2, accessory subunit [Source:VGNC Symbol;Acc:VGNC:33114]		1.84967			1	6.1921	3.55519	7.31611	8.80698	9.09877	26.9572	17.397	11.3389	11.2638	17.8296
ENSBTAG00000013036	YDJC	YdjC chitooligosaccharide deacetylase homolog [Source:VGNC Symbol;Acc:VGNC:37019]		1.8541			1	0.614132	0.369115	0.716157	0.628815	0.758595	2.50686	1.43246	0.783754	0.595272	2.28807
ENSBTAG00000021910	TBL1XR1	transducin beta like 1 X-linked receptor 1 [Source:NCBI gene;Acc:614346]		1.86137			1	0.534615	0.761156	0.985198	1.34432	1.55056	2.23807	3.2226	1.91535	1.23531	3.31986
ENSBTAG00000004540	NUB1	negative regulator of ubiquitin like proteins 1 [Source:VGNC Symbol;Acc:VGNC:32314]		1.87396			1	59.7194	51.004	43.052	52.6458	41.572	244.4	224.798	91.3304	59.1602	135.224
ENSBTAG00000031567	SMARCC1	SWI/SNF related, matrix associated, actin dependent regulator of chromatin subfamily c member 1 [Source:VGNC Symbol;Acc:VGNC:58414]		1.90667			1	0.532309	0.99681	2.05902	2.17077	0.778681	4.04856	3.45488	1.68981	2.00756	4.62513
ENSBTAG00000009426	EZH2	enhancer of zeste 2 polycomb repressive complex 2 subunit [Source:VGNC Symbol;Acc:VGNC:28675]		1.91686			1	13.1796	10.0079	8.78051	16.2921	15.6897	45.6941	48.1302	22.9823	20.1886	32.902
ENSBTAG00000007234	PLRG1	pleiotropic regulator 1 [Source:VGNC Symbol;Acc:VGNC:33050]		1.92166			1	1.13576	0.592287	0.333268	1.4552	1.17618	1.69601	3.87071	2.04515	1.23178	2.41713
ENSBTAG00000013699	TBC1D1	TBC1 domain family member 1 [Source:VGNC Symbol;Acc:VGNC:35623]		1.94851			1	1.02954	1.36885	2.42086	3.0265	1.25263	6.01475	5.37923	1.82953	0.963804	6.76459
ENSBTAG00000018812	NOP56	NOP56 ribonucleoprotein [Source:VGNC Symbol;Acc:VGNC:32169]		1.95715			1	42.0189	48.5617	57.4152	69.9359	69.9153	236.03	197.803	106.02	97.4679	166.557
ENSBTAG00000010948	CLIC2	chloride intracellular channel 2 [Source:VGNC Symbol;Acc:VGNC:27440]		1.95785			1	7.43906	5.00822	8.90165	4.7738	5.46088	28.7048	29.7878	15.5919	13.4779	28.2889
ENSBTAG00000021107	STXBP5	syntaxin binding protein 5 [Source:VGNC Symbol;Acc:VGNC:35448]		1.9609			1	10.8499	11.6872	12.2144	8.58357	7.55724	56.8525	54.4976	26.1525	21.7109	36.0302
ENSBTAG00000003339	ZBTB10	zinc finger and BTB domain containing 10 [Source:VGNC Symbol;Acc:VGNC:37058]		1.97865			1	4.12469	3.74274	3.15938	4.38063	3.4601	21.3941	16.7279	9.45261	5.25037	9.82823
ENSBTAG00000013577	SLC1A5	solute carrier family 1 member 5 [Source:VGNC Symbol;Acc:VGNC:34715]		1.98107			1	223.224	153.673	154.682	114.36	126.072	870.715	911.142	331.949	271.095	466.722
ENSBTAG00000030646	KCTD17	potassium channel tetramerization domain containing 17 [Source:VGNC Symbol;Acc:VGNC:30506]		1.98214			1	1.23906	0.722971	0.902151	0.873788	0.59226	5.07717	2.90423	1.61823	1.11985	3.68122
ENSBTAG00000017508	CYSLTR2	cysteinyl leukotriene receptor 2 [Source:VGNC Symbol;Acc:VGNC:50271]		1.99526			1	0.566392	2.86817	1.50277	0.615817	0.697209	6.44696	5.2555	2.21821	1.2372	5.69572
ENSBTAG00000034776	DDAH1	dimethylarginine dimethylaminohydrolase 1 [Source:VGNC Symbol;Acc:VGNC:27939]		1.99663			1	0.178235	0.193206	0.142874	0.152601	0.245954	0.739712	0.994417	0.450489	0.620956	0.551442
ENSBTAG00000012725	C10H14orf93	chromosome 10 C14orf93 homolog [Source:VGNC Symbol;Acc:VGNC:52610]		2.0011			1	0.989959	0.494987	0.20412	0.351635	0.680556	2.09023	2.09542	0.707318	0.963829	1.75378
ENSBTAG00000048459	CARHSP1	calcium regulated heat stable protein 1 [Source:NCBI gene;Acc:506760]		2.0028			1	1.58382	2.11315	2.43629	2.68732	3.43984	8.74435	8.01111	3.91837	4.06076	8.34532
ENSBTAG00000021073	KIAA1549	KIAA1549 [Source:VGNC Symbol;Acc:VGNC:59342]		2.02094			1	1.9949	0.467828	1.1063	0.549337	0.457311	5.54268	6.10402	1.33761	1.40844	2.38462
ENSBTAG00000005799	KIRREL1	kirre like nephrin family adhesion molecule 1 [Source:VGNC Symbol;Acc:VGNC:30614]		2.03486			1	0.416933	0.304136	0.641184	0.63304	0.48519	2.02912	2.16111	0.968361	0.866411	1.40889
ENSBTAG00000013953	CALD1	caldesmon 1 [Source:VGNC Symbol;Acc:VGNC:26706]		2.0399			1	1.02598	1.6188	2.95057	0.824223	0.756618	5.89309	6.95923	1.66512	2.07278	8.85282
ENSBTAG00000026768	TH	tyrosine hydroxylase [Source:VGNC Symbol;Acc:VGNC:35816]		2.04907			1	0.248445	0.199261	0.659363	0.419893	0.539557	1.33403	1.8543	0.234901	0.114441	0.995456
ENSBTAG00000004073	MTA3	metastasis associated 1 family member 3 [Source:VGNC Symbol;Acc:VGNC:31715]		2.06406			1	3.56387	1.30737	5.30652	3.51304	1.25777	16.9724	10.2093	4.77505	2.37604	12.246
ENSBTAG00000003763	MYO5C	myosin VC [Source:VGNC Symbol;Acc:VGNC:31828]		2.06532			1	0.0932074	0.259281	0.104679	0.157068	0.226247	0.819919	0.729716	0.198489	0.273049	0.400331
ENSBTAG00000000993	N4BP2L1	NEDD4 binding protein 2 like 1 [Source:VGNC Symbol;Acc:VGNC:53826]		2.07203			1	3.44979	1.02093	1.41507	3.85577	3.41926	8.2437	11.4336	6.79633	5.05186	4.5153
ENSBTAG00000050060	NCR3LG1	natural killer cell cytotoxicity receptor 3 ligand 1 [Source:NCBI gene;Acc:523303]		2.07304			1	12.4299	8.81755	9.38818	7.20224	7.11391	57.4116	53.4077	22.2945	14.86	29.857
ENSBTAG00000003012	TRAF1	TNF receptor associated factor 1 [Source:VGNC Symbol;Acc:VGNC:36270]		2.07656			1	13.5227	7.79887	8.53928	11.2732	10.3331	50.1493	29.9298	11.7246	9.22702	49.785
ENSBTAG00000048114	0	retinoic acid early transcript 1E-like [Source:NCBI gene;Acc:100848331]		2.0879			1	0.414487	0.749357	0.393362	0.59209	0.435228	2.83092	1.88144	0.957078	0.479249	2.05188
ENSBTAG00000017007	TRIB3	tribbles pseudokinase 3 [Source:VGNC Symbol;Acc:VGNC:36310]		2.09284			1	36.2239	11.8074	8.19666	16.7874	16.4052	86.0081	83.5712	43.1658	27.905	42.9713
ENSBTAG00000010238	LTB4R	leukotriene B4 receptor [Source:VGNC Symbol;Acc:VGNC:31069]		2.09736			1	7.46919	4.64178	4.62208	7.71477	6.52655	20.0262	16.8436	11.9873	8.25486	41.0607
ENSBTAG00000014791	CTH	cystathionine gamma-lyase [Source:VGNC Symbol;Acc:VGNC:27795]		2.10106			1	1.67328	1.92334	1.92678	2.38634	1.96513	9.89769	11.903	4.67781	3.68531	5.20478
ENSBTAG00000008690	SLC6A9	solute carrier family 6 member 9 [Source:NCBI gene;Acc:282368]		2.11329			1	7.37612	3.69445	1.51664	7.08273	7.81397	20.5639	23.2183	13.4717	11.1614	8.46554
ENSBTAG00000012449	AFF3	AF4/FMR2 family member 3 [Source:VGNC Symbol;Acc:VGNC:59202]		2.11672			1	0.266558	0.302655	0.876996	0.149084	0.100727	2.68795	1.80566	1.0949	0.425019	1.31832
ENSBTAG00000003222	ASNS	asparagine synthetase (glutamine-hydrolyzing) [Source:NCBI gene;Acc:514209]		2.12215			1	93.2854	33.1531	28.4552	70.2053	73.0319	252.791	287.238	140.784	115.84	119.068
ENSBTAG00000000817	SYNJ2	synaptojanin 2 [Source:VGNC Symbol;Acc:VGNC:35528]		2.12431			1	0.10345	0.207323	0.0742413	0.0730275	0.0734428	0.721984	0.400473	0.253281	0.206372	0.545975
ENSBTAG00000015553	SCAI	suppressor of cancer cell invasion [Source:NCBI gene;Acc:521431]		2.15135			1	1.15141	1.20862	0.782973	2.73241	0.483766	4.66683	5.51946	2.9416	2.99758	4.72054
ENSBTAG00000001163	H2AFY2	H2A histone family member Y2 [Source:VGNC Symbol;Acc:VGNC:55987]		2.15783			1	0.570045	0.394345	1.26436	0.38675	0.536815	3.54598	2.06342	0.684374	0.685735	3.77514
ENSBTAG00000003661	0	solute carrier family 35 member F2 [Source:NCBI gene;Acc:533008]		2.15982			1	1.39469	1.27355	1.76543	2.41154	1.48411	8.87459	7.0246	3.99503	2.13887	5.62402
ENSBTAG00000021359	0	0		2.16953			1	0.0900576	0.182298	0.103021	0.649229	0.527214	0.905172	0.5282	0.613796	0.612471	0.439706
ENSBTAG00000010826	EMSY	EMSY transcriptional repressor, BRCA2 interacting [Source:VGNC Symbol;Acc:VGNC:28484]		2.17618			1	0.141835	0.0563816	0.197934	0.377388	0.336176	0.787516	0.387429	0.385328	0.611413	0.611749
ENSBTAG00000005586	GATM	glycine amidinotransferase [Source:VGNC Symbol;Acc:VGNC:29274]		2.19984			1	47.0194	42.4774	54.7094	44.1181	33.5325	306.412	216.875	78.8062	59.2289	192.356
ENSBTAG00000009637	SLC12A2	solute carrier family 12 member 2 [Source:VGNC Symbol;Acc:VGNC:34665]		2.20293			1	1.04606	0.958493	0.942585	1.64416	1.72441	7.01601	5.6674	2.16525	1.71815	2.91048
ENSBTAG00000003205	RPL35	ribosomal protein L35 [Source:NCBI gene;Acc:515534]		2.2266			1	0.708108	1.51386	3.16579	1.7675	1.46181	8.88647	7.38009	3.00029	1.31381	5.60636
ENSBTAG00000008323	SNAP25	synaptosome associated protein 25 [Source:VGNC Symbol;Acc:VGNC:35051]		2.22972			1	4.96739	3.74818	4.50973	2.92539	1.60314	32.4759	21.9459	9.6361	3.82474	15.2018
ENSBTAG00000008966	TSPAN7	tetraspanin 7 [Source:NCBI gene;Acc:615596]		2.25424			1	0.20227	0.550763	0.414002	0.318896	0.433471	2.12852	1.99699	0.868494	0.643746	1.47745
ENSBTAG00000019081	COL7A1	collagen type VII alpha 1 chain [Source:VGNC Symbol;Acc:VGNC:27573]		2.25699			1	0.368187	0.3297	0.194475	0.279843	0.401423	2.28453	2.17345	0.636006	0.48117	0.62013
ENSBTAG00000004849	IGSF3	immunoglobulin superfamily member 3 [Source:VGNC Symbol;Acc:VGNC:30094]		2.29883			1	0.283855	0.215065	0.315751	0.291707	0.266442	1.73492	1.52797	0.492924	0.398954	1.01733
ENSBTAG00000015592	GPR84	G protein-coupled receptor 84 [Source:VGNC Symbol;Acc:VGNC:29601]		2.29892			1	4.69175	2.1849	2.59032	3.91072	5.02988	21.8013	19.2047	9.48449	5.18413	8.98234
ENSBTAG00000018942	SSX2IP	SSX family member 2 interacting protein [Source:VGNC Symbol;Acc:VGNC:35329]		2.30109			1	0.935946	1.04443	1.06982	1.5486	1.76179	6.66205	6.86273	3.10454	2.12512	3.44482
ENSBTAG00000009643	ZBTB25	zinc finger and BTB domain containing 25 [Source:VGNC Symbol;Acc:VGNC:37069]		2.30199			1	9.73237	9.23196	6.58605	5.72485	5.86704	61.3817	46.7326	16.8434	12.555	30.7728
ENSBTAG00000008649	ETV3	ETS variant 3 [Source:VGNC Symbol;Acc:VGNC:50176]		2.30488			1	8.12924	13.1607	9.68201	11.8946	10.4465	83.5073	50.7379	21.4884	13.6592	34.5093
ENSBTAG00000007827	RCOR2	REST corepressor 2 [Source:VGNC Symbol;Acc:VGNC:33835]		2.30746			1	0.0446898	0.0243899	0.0481763	0.0195798	0.0238607	0.290536	0.221372	0.0956296	0.0714554	0.136619
ENSBTAG00000008150	PKIA	cAMP-dependent protein kinase inhibitor alpha [Source:VGNC Symbol;Acc:VGNC:32940]		2.31209			1	3.18648	1.11645	1.63144	1.11655	0.375431	18.1333	7.65719	3.51236	1.20599	6.7258
ENSBTAG00000016902	SGTB	small glutamine rich tetratricopeptide repeat containing beta [Source:VGNC Symbol;Acc:VGNC:34554]		2.31264			1	0.315148	0.332857	0.586034	0.300577	0.302253	2.78414	2.87264	0.450995	0.571913	1.23584
ENSBTAG00000007927	SLAMF1	signaling lymphocytic activation molecule family member 1 [Source:VGNC Symbol;Acc:VGNC:34653]		2.31599			1	12.5732	5.51575	11.4322	4.67669	4.91633	53.8696	60.0161	16.9759	13.1135	34.6795
ENSBTAG00000006132	DENND3	DENN domain containing 3 [Source:VGNC Symbol;Acc:VGNC:27998]		2.33416			1	1.35121	1.12649	1.24431	0.839675	0.903838	8.17771	6.5077	1.83905	1.26213	5.17569
ENSBTAG00000000654	ARMC4	armadillo repeat containing 4 [Source:VGNC Symbol;Acc:VGNC:26158]		2.34809			1	0.0933884	0.28014	0.392797	0.0243604	0	1.27329	0.733847	0.503979	0.421083	1.73273
ENSBTAG00000015991	CDH1	cadherin 1 [Source:VGNC Symbol;Acc:VGNC:27090]		2.35323			1	2.91058	1.89566	4.51605	0.981426	1.27823	22.4838	15.1689	9.1078	3.37127	11.608
ENSBTAG00000019349	SLC6A4	solute carrier family 6 member 4 [Source:VGNC Symbol;Acc:VGNC:49971]		2.35586			1	0.592036	0.717386	0.380813	1.16842	1.1991	5.18183	3.58434	1.59461	0.984126	1.49425
ENSBTAG00000047904	0	hydroxycarboxylic acid receptor 2 [Source:NCBI gene;Acc:527744]		2.37579			1	0.25286	0.910788	0.220603	1.57943	1.64183	2.09347	2.14025	1.72719	1.65336	1.96716
ENSBTAG00000007071	RAI14	retinoic acid induced 14 [Source:VGNC Symbol;Acc:VGNC:33696]		2.39833			1	0.481552	0.486819	2.24088	0.309385	0.371258	5.40327	3.68461	1.53099	0.33369	4.31747
ENSBTAG00000005373	TPM1	tropomyosin 1 [Source:NCBI gene;Acc:281544]		2.39843			1	7.18478	5.61143	4.4602	8.88445	12.6341	45.4406	30.6797	17.6183	12.2242	22.175
ENSBTAG00000015764	EML2	EMAP like 2 [Source:VGNC Symbol;Acc:VGNC:28476]		2.40801			1	0.1002	0.0680183	0.120855	0.0438886	0.105074	0.891346	0.45966	0.0792667	0.174089	0.368393
ENSBTAG00000011982	BATF3	basic leucine zipper ATF-like transcription factor 3 [Source:VGNC Symbol;Acc:VGNC:26427]		2.42085			1	13.3486	6.92945	6.98412	9.07453	7.51259	54.2434	52.1676	22.6382	13.6614	37.0055
ENSBTAG00000015505	FADS2	fatty acid desaturase 2 [Source:VGNC Symbol;Acc:VGNC:28702]		2.44644			1	9.66596	12.5451	4.08169	1.87834	3.56358	63.9831	29.6783	3.4678	4.03735	48.0746
ENSBTAG00000004386	SOCS1	suppressor of cytokine signaling 1 [Source:VGNC Symbol;Acc:VGNC:35119]		2.45253			1	6.22446	7.7484	8.43315	7.88418	3.7049	69.3733	45.0722	22.6292	16.0878	21.8938
ENSBTAG00000020489	SEMA6A	semaphorin 6A [Source:VGNC Symbol;Acc:VGNC:34441]		2.4696			1	0.0773579	0.185276	0.531955	0.104326	0.105119	0.789791	1.78804	0.45711	0.582977	1.02664
ENSBTAG00000009151	PYGO1	pygopus family PHD finger 1 [Source:VGNC Symbol;Acc:VGNC:33590]		2.47028			1	0.229562	0.182544	0.460439	0.484088	0.227734	1.97214	1.64892	0.815288	0.416001	1.2082
ENSBTAG00000046266	TNFSF9	TNF superfamily member 9 [Source:VGNC Symbol;Acc:VGNC:36178]		2.47063			1	1.21974	3.62955	0.69826	2.79159	2.37562	8.13914	10.5183	4.14802	3.44432	6.9997
ENSBTAG00000009654	LPAR1	lysophosphatidic acid receptor 1 [Source:VGNC Symbol;Acc:VGNC:30955]		2.48026			1	0.256491	0.201715	0.277464	0.548399	0.468647	1.26982	1.62916	0.332911	0.657783	1.52739
ENSBTAG00000010606	PPP1R3B	protein phosphatase 1 regulatory subunit 3B [Source:VGNC Symbol;Acc:VGNC:33243]		2.48041			1	0.211581	0.154432	0.117359	0.119525	0.189451	1.04359	0.930949	0.0485278	0.133796	0.858146
ENSBTAG00000054228	0	0		2.49199			1	0.0213189	0.00825184	0.0163939	0.004405	0.00811704	0.124882	0.0748449	0.0323254	0.0485526	0.0909796
ENSBTAG00000009642	AKAP5	A-kinase anchoring protein 5 [Source:VGNC Symbol;Acc:VGNC:25786]		2.49636			1	8.35159	7.94772	7.38072	4.519	4.92899	57.8312	47.7465	12.6574	11.2834	37.6356
ENSBTAG00000048876	FAM117B	family with sequence similarity 117 member B [Source:NCBI gene;Acc:614932]		2.49964			1	1.10051	0.497	0.986688	0.883953	0.754359	5.76012	3.87218	2.38785	2.10445	5.07504
ENSBTAG00000021799	RCN3	reticulocalbin 3 [Source:VGNC Symbol;Acc:VGNC:33833]		2.50189			1	1.49351	0.713856	2.20059	2.76138	2.31015	7.6902	6.77757	3.55054	2.77446	8.48385
ENSBTAG00000016644	LVRN	laeverin [Source:VGNC Symbol;Acc:VGNC:31086]		2.50721			1	0.164436	1.46209	1.25984	0.11889	0.182712	4.37439	3.06015	0.371624	0.203211	4.90755
ENSBTAG00000049397	CAV2	caveolin 2 [Source:NCBI gene;Acc:493642]		2.50921			1	0.287264	0.278179	0.533289	0.370616	0.221628	2.5436	2.41302	0.813996	0.443272	1.53656
ENSBTAG00000000855	NXN	nucleoredoxin [Source:VGNC Symbol;Acc:VGNC:32376]		2.51371			1	1.31901	0.616971	1.46369	1.13231	0.838616	8.72214	4.78153	3.88883	2.0348	5.92827
ENSBTAG00000018811	TMC2	transmembrane channel like 2 [Source:VGNC Symbol;Acc:VGNC:35918]		2.51609			1	0.0864592	0.052198	0.037215	0.0959312	0.0587996	0.34655	0.348546	0.189615	0.182291	0.351636
ENSBTAG00000008331	TMEM54	transmembrane protein 54 [Source:VGNC Symbol;Acc:VGNC:36097]		2.52146			1	0.0828533	0.0449138	0.0518712	0	0.0145622	0.33223	0.544344	0.0431391	0.0154274	0.294567
ENSBTAG00000046503	NCOA7	nuclear receptor coactivator 7 [Source:NCBI gene;Acc:541071]		2.52159			1	0.577433	1.14592	1.0154	3.13784	1.35774	6.76568	4.17126	1.4864	1.79115	5.4206
ENSBTAG00000007836	PPA1	inorganic pyrophosphatase 1 [Source:VGNC Symbol;Acc:VGNC:55992]		2.53678			1	21.6427	25.6308	36.4108	29.3125	30.4389	217.939	205.951	67.8253	51.8914	108.196
ENSBTAG00000014541	PDGFA	platelet derived growth factor subunit A [Source:VGNC Symbol;Acc:VGNC:32689]		2.5387			1	2.83906	1.69255	4.1381	1.89536	1.83247	27.6304	21.8999	3.9162	3.16726	7.36619
ENSBTAG00000014123	ZNF507	zinc finger protein 507 [Source:VGNC Symbol;Acc:VGNC:37289]		2.54248			1	0.209102	0.126769	0.16674	0.149804	0.0723201	1.40531	1.01569	0.394017	0.242817	0.797133
ENSBTAG00000032084	GPR183	G protein-coupled receptor 183 [Source:VGNC Symbol;Acc:VGNC:29577]		2.55002			1	28.6918	49.0244	37.9751	38.6537	32.2275	262.567	250.641	51.8121	43.6063	203.476
ENSBTAG00000017833	RNF19A	ring finger protein 19A, RBR E3 ubiquitin protein ligase [Source:VGNC Symbol;Acc:VGNC:34044]		2.55852			1	0.287214	0.265683	0.233148	0.365829	0.292276	1.56678	1.41823	1.40994	0.694703	2.01778
ENSBTAG00000014611	SORL1	sortilin related receptor 1 [Source:VGNC Symbol;Acc:VGNC:35132]		2.57116			1	1.67327	0.424892	0.215839	1.13512	0.841363	3.95309	3.48342	0.21176	0.679632	2.86033
ENSBTAG00000001229	SLC25A22	solute carrier family 25 member 22 [Source:VGNC Symbol;Acc:VGNC:34750]		2.5885			1	1.74349	1.09151	1.4588	2.72006	1.9701	12.3083	8.58836	5.89677	3.4161	6.47211
ENSBTAG00000021263	CYP4V2	cytochrome P450, family 4, subfamily V, polypeptide 2 [Source:NCBI gene;Acc:510156]		2.58986			1	1.00952	0.273255	0.317752	0.936467	0.574856	3.88104	2.67546	1.61939	1.12827	2.26722
ENSBTAG00000009076	ADD2	adducin 2 [Source:VGNC Symbol;Acc:VGNC:25654]		2.59538			1	0.718474	0.343181	0.264452	0.231338	0.292154	3.98549	4.04792	2.13706	1.26351	1.10199
ENSBTAG00000012558	ADAMTS12	ADAM metallopeptidase with thrombospondin type 1 motif 12 [Source:VGNC Symbol;Acc:VGNC:25616]		2.59566			1	1.1257	0.546589	1.85392	0.803315	0.468539	8.67029	6.86179	2.37642	1.45147	4.89964
ENSBTAG00000012074	MYB	MYB proto-oncogene, transcription factor [Source:VGNC Symbol;Acc:VGNC:31776]		2.62216			1	1.32343	0.967074	0.808388	0.931288	1.1665	11.6071	8.83157	3.75255	3.0381	3.17486
ENSBTAG00000003045	BAMBI	BMP and activin membrane bound inhibitor [Source:VGNC Symbol;Acc:VGNC:26417]		2.64601			1	0.0281333	0.0639307	0.0363743	0.0389314	0.0989033	0.469397	0.260619	0.106899	0.0876874	0.215107
ENSBTAG00000011082	IGF1	insulin like growth factor 1 [Source:VGNC Symbol;Acc:VGNC:30076]		2.64957			1	3.24656	1.46254	1.10988	2.32842	3.55979	12.2542	12.1498	4.10783	3.52244	10.2513
ENSBTAG00000026753	CXCR1	chemokine (C-X-C motif) receptor 1 [Source:NCBI gene;Acc:281863]		2.6534			1	1.24885	0.861971	0.70812	1.75622	2.39935	9.98038	7.35379	4.74466	3.54169	3.27578
ENSBTAG00000003871	CYP2B6	cytochrome P450 subfamily 2B [Source:NCBI gene;Acc:504769]		2.66276			1	0.28466	0.0938086	0.103391	0.251966	0.16777	1.2625	0.975369	0.432342	0.322653	0.748793
ENSBTAG00000011851	FYN	FYN proto-oncogene, Src family tyrosine kinase [Source:VGNC Symbol;Acc:VGNC:29163]		2.67695			1	5.91725	1.18599	5.50773	5.02419	4.41556	28.4779	28.3209	13.6817	8.31348	14.4202
ENSBTAG00000001835	GJA1	gap junction protein alpha 1 [Source:VGNC Symbol;Acc:VGNC:29370]		2.68398			1	0.1856	0.447326	0.586658	0.486378	0.80424	1.66546	3.18493	0.526603	0.508936	2.96019
ENSBTAG00000051383	DEFB7	defensin beta 7 [Source:NCBI gene;Acc:768320]		2.69384			1	4.46432	3.66135	14.618	3.21202	2.18701	47.8908	28.5398	18.3037	10.4596	50.1456
ENSBTAG00000016137	ZNF608	zinc finger protein 608 [Source:VGNC Symbol;Acc:VGNC:37311]		2.70578			1	0.126492	0.186992	0.0797723	0.101928	0.116291	0.727566	1.0308	0.290666	0.236517	0.861269
ENSBTAG00000002215	GFPT2	glutamine-fructose-6-phosphate transaminase 2 [Source:VGNC Symbol;Acc:VGNC:29331]		2.7416			1	0.665316	0.814019	0.400364	0.492536	0.3352	7.84215	3.87095	0.942225	0.559477	2.70799
ENSBTAG00000005647	GPR132	G protein-coupled receptor 132 [Source:VGNC Symbol;Acc:VGNC:29548]		2.74412			1	0.0954282	0.497144	0.294133	0.0984528	0.292156	2.18953	1.23459	0.299513	0.204422	1.78323
ENSBTAG00000010775	POGK	pogo transposable element derived with KRAB domain [Source:VGNC Symbol;Acc:VGNC:33107]		2.77078			1	0.0894897	0.0393837	0.162454	0.0555041	0.283669	0.61325	0.851322	0.212102	0.15309	0.430429
ENSBTAG00000053645	CYP3A5	cytochrome P450, family 3, subfamily A, polypeptide 5 [Source:NCBI gene;Acc:526682]		2.77286			1	0.23924	0.239277	0.209416	0.243798	0.417795	1.82164	2.77774	0.69899	0.791394	0.992466
ENSBTAG00000038124	FCGR2A	Fc fragment of IgG receptor IIa [Source:NCBI gene;Acc:782652]		2.77485			1	26.7936	23.8233	11.0851	19.2928	44.7989	128.26	134.668	49.0378	84.3715	158.568
ENSBTAG00000047225	BCL2L14	BCL2 like 14 [Source:VGNC Symbol;Acc:VGNC:26448]		2.7819			1	0.309382	0.67124	1.03944	1.37102	0.849702	5.74877	4.1459	2.61608	1.98099	3.44478
ENSBTAG00000021396	HEG1	heart development protein with EGF like domains 1 [Source:VGNC Symbol;Acc:VGNC:29803]		2.78691			1	0.165993	0.115904	0.497399	0.19095	0.135921	1.91836	1.75863	0.331681	0.221151	1.07617
ENSBTAG00000051298	PVR	PVR cell adhesion molecule [Source:NCBI gene;Acc:526865]		2.84257			1	3.10677	3.69353	2.74859	2.29305	2.36198	25.3429	18.8369	4.49535	2.69634	28.9442
ENSBTAG00000013825	BCAT1	branched chain amino acid transaminase 1 [Source:VGNC Symbol;Acc:VGNC:26439]		2.85508			1	2.55131	1.17733	4.10663	5.66415	12.1728	17.7336	34.4917	11.4491	18.7034	9.17347
ENSBTAG00000005078	UCHL1	ubiquitin C-terminal hydrolase L1 [Source:VGNC Symbol;Acc:VGNC:36631]		2.86279			1	0.577789	3.33161	8.45165	2.05884	0.691309	19.1375	19.5702	4.51805	3.28793	17.9276
ENSBTAG00000046862	MARCKSL1	MARCKS like 1 [Source:VGNC Symbol;Acc:VGNC:31245]		2.86958			1	20.1572	24.096	48.669	39.3512	32.8085	242.258	217.361	69.8147	46.1173	195.343
ENSBTAG00000006432	KCNE4	potassium voltage-gated channel subfamily E regulatory subunit 4 [Source:VGNC Symbol;Acc:VGNC:30439]		2.87545			1	0.340416	2.87802	3.82098	0.158527	0.161896	18.0919	12.3871	2.33631	1.18041	7.64606
ENSBTAG00000032623	KCNG3	potassium voltage-gated channel modifier subfamily G member 3 [Source:VGNC Symbol;Acc:VGNC:58383]		2.89285			1	0.0529219	0.101753	0.116784	0.0728064	0.0332972	0.909117	0.982737	0.233323	0.126267	0.432062
ENSBTAG00000011620	PIGU	phosphatidylinositol glycan anchor biosynthesis class U [Source:VGNC Symbol;Acc:VGNC:32879]		2.89781			1	1.09526	0.304377	0.2633	1.72737	0.576635	5.16401	2.39688	2.09197	1.91328	3.66948
ENSBTAG00000014546	CLEC7A	C-type lectin domain containing 7A [Source:VGNC Symbol;Acc:VGNC:58597]		2.90535			1	3.9947	17.8625	3.1052	30.652	54.8546	61.6021	51.9198	10.5805	45.6731	36.3289
ENSBTAG00000011770	TJP2	tight junction protein 2 [Source:VGNC Symbol;Acc:VGNC:35882]		2.90758			1	0.836731	2.59643	0.349209	0.634964	0.829363	7.84614	10.6668	0.795711	1.11292	4.6421
ENSBTAG00000007253	TSPAN33	tetraspanin 33 [Source:VGNC Symbol;Acc:VGNC:36438]		2.91035			1	7.31959	2.95441	3.59969	11.8308	7.56514	58.73	38.9493	18.7717	9.63289	17.1659
ENSBTAG00000014207	ADAMTS10	ADAM metallopeptidase with thrombospondin type 1 motif 10 [Source:VGNC Symbol;Acc:VGNC:25615]		2.91129			1	0.308305	0.279622	0.223132	0.19609	0.145946	3.63421	1.82992	0.460753	0.224808	1.45998
ENSBTAG00000025450	SYNE2	spectrin repeat containing nuclear envelope protein 2 [Source:VGNC Symbol;Acc:VGNC:35521]		2.95438			1	1.59136	0.237813	0.352556	2.25816	1.94171	6.80119	3.85503	4.37804	2.61557	2.93921
ENSBTAG00000007654	CHST7	carbohydrate sulfotransferase 7 [Source:VGNC Symbol;Acc:VGNC:27347]		2.99049			1	1.13177	0.449986	0.763773	1.41948	1.41116	8.373	7.35756	2.7384	2.49065	3.52057
ENSBTAG00000017122	HSPG2	heparan sulfate proteoglycan 2 [Source:VGNC Symbol;Acc:VGNC:29988]		3.01863			1	0.131748	0.0480603	0.213739	0.0588668	0.0423973	1.63524	0.83017	0.656764	0.240642	0.60302
ENSBTAG00000004257	TAF4B	TATA-box binding protein associated factor 4b [Source:VGNC Symbol;Acc:VGNC:35575]		3.04004			1	0.165215	0.296823	0.295033	0.412278	0.244908	3.24814	3.05483	1.2403	0.846382	1.04036
ENSBTAG00000001823	STC2	stanniocalcin 2 [Source:VGNC Symbol;Acc:VGNC:35378]		3.04234			1	7.76845	2.66026	5.61792	5.20528	7.81523	40.3278	76.6989	14.7744	20.3543	23.2412
ENSBTAG00000013880	WWC1	WW and C2 domain containing 1 [Source:VGNC Symbol;Acc:VGNC:36974]		3.07009			1	0.0231336	0.0712467	0.0975062	0.0648867	0.0161346	0.467187	0.602612	0.0429942	0.058227	0.431483
ENSBTAG00000022715	0	0		3.09291			1	0.312969	0.0482727	0.211813	0.0884216	0.136295	1.93103	0.940771	1.00727	0.849201	1.36696
ENSBTAG00000001396	ADAMTS7	ADAM metallopeptidase with thrombospondin type 1 motif 7 [Source:VGNC Symbol;Acc:VGNC:57155]		3.10962			1	0.161096	0.248638	0.162642	0.34619	0.395595	2.67126	2.58268	1.02841	0.823813	0.735042
ENSBTAG00000012805	TSPAN13	tetraspanin 13 [Source:VGNC Symbol;Acc:VGNC:36428]		3.12411			1	0.682247	3.06552	0.622613	2.44977	4.5493	16.1307	11.6185	2.68774	5.55607	6.18848
ENSBTAG00000014944	TBXA2R	thromboxane A2 receptor [Source:VGNC Symbol;Acc:VGNC:35673]		3.12562			1	0.09744	0.0659551	0.140602	0.0401135	0.0555809	1.0061	1.73059	0.202722	0.120702	0.456199
ENSBTAG00000031287	TMEM158	transmembrane protein 158 [Source:NCBI gene;Acc:788085]		3.13052			1	0.0501292	0.256366	0.454705	0.170064	0.0237834	1.68315	1.6083	0.55334	0.406445	1.75383
ENSBTAG00000051504	0	0		3.14233			1	0.41757	0.456541	0.117406	0.127755	0	1.95053	5.3116	0.302659	0.222845	2.04127
ENSBTAG00000011207	CNN1	calponin 1 [Source:VGNC Symbol;Acc:VGNC:27508]		3.14769			1	0.0247293	0.0120171	0.0475725	0	0	0.225225	0.258829	0	0.0128515	0.351521
ENSBTAG00000003950	PROC	protein C, inactivator of coagulation factors Va and VIIIa [Source:VGNC Symbol;Acc:VGNC:56139]		3.18798			1	0.256451	0.023627	0.108746	0.0919233	0.156265	1.38792	0.883406	0.300497	0.194712	0.606723
ENSBTAG00000013366	NRIP3	nuclear receptor interacting protein 3 [Source:VGNC Symbol;Acc:VGNC:32264]		3.19129			1	0.0478102	0.0578031	0.0576391	0.0309656	0.0165811	0.96088	0.598822	0.220291	0.126242	0.305557
ENSBTAG00000024492	0	tyrosine-protein phosphatase non-receptor type 11 [Source:NCBI gene;Acc:526769]		3.21229			1	0.264762	0.169591	0.345565	0.0121689	0.153322	2.8452	3.42908	0.61895	0.586779	1.47462
ENSBTAG00000007164	FGFR3	fibroblast growth factor receptor 3 [Source:VGNC Symbol;Acc:VGNC:50180]		3.25336			1	0.0259094	0.00422651	0.0209593	0.0317923	0.0457352	0.127363	0.201859	0.0873664	0.0453929	0.14523
ENSBTAG00000011337	ANKRD33B	ankyrin repeat domain 33B [Source:VGNC Symbol;Acc:VGNC:25923]		3.26775			1	0.21546	0.304658	0.444807	0.667355	0.334619	4.79105	2.6897	1.6961	0.730163	2.34304
ENSBTAG00000017228	TP53I11	tumor protein p53 inducible protein 11 [Source:NCBI gene;Acc:515682]		3.29263			1	1.45379	0.672602	2.17541	1.10754	1.28117	19.4905	16.2356	9.22683	5.41887	7.04571
ENSBTAG00000011007	TTYH2	tweety family member 2 [Source:VGNC Symbol;Acc:VGNC:36501]		3.34368			1	0.413709	0.379585	0.815001	0.674027	0.512379	5.6043	5.58493	1.11338	0.504163	4.73801
ENSBTAG00000025257	CCL4	C-C motif chemokine ligand 4 [Source:NCBI gene;Acc:414347]		3.36448			1	13.8963	5.87209	7.51327	18.5232	10.2111	77.9968	48.6928	21.6778	8.94812	194.138
ENSBTAG00000019421	DACT1	dishevelled binding antagonist of beta catenin 1 [Source:VGNC Symbol;Acc:VGNC:27867]		3.37295			1	0.00804401	0.00754325	0.00743327	0.0162744	0.0147749	0.112847	0.102635	0.0296473	0.00800756	0.138657
ENSBTAG00000018240	CYP2S1	cytochrome P450, family 2, subfamily S, polypeptide 1 [Source:NCBI gene;Acc:514971]		3.40267			1	1.33034	0.391816	2.01761	0.58367	0.250177	17.2858	5.02834	3.99906	1.31212	15.3166
ENSBTAG00000013452	AQP9	aquaporin 9 [Source:VGNC Symbol;Acc:VGNC:26051]		3.41817			1	1.02134	8.17514	1.86195	0.698155	1.54178	22.7262	37.911	6.00892	11.7312	27.1216
ENSBTAG00000003572	F11	coagulation factor XI [Source:VGNC Symbol;Acc:VGNC:28678]		3.43086			1	0.570286	0.775573	0.509627	1.11489	0.932232	12.7913	5.7897	1.93514	1.26369	4.94799
ENSBTAG00000015872	PROKR2	prokineticin receptor 2 [Source:VGNC Symbol;Acc:VGNC:33363]		3.44622			1	0.21557	0.166914	0.11457	0.0111479	0.0516886	2.07451	2.15757	0.153665	0.256547	1.56585
ENSBTAG00000016208	TGM2	transglutaminase 2 [Source:VGNC Symbol;Acc:VGNC:35810]		3.49457			1	1.24528	1.15068	0.279697	0.412175	0.604872	11.811	7.31536	1.71736	1.18921	8.01651
ENSBTAG00000048508	INHBA	inhibin subunit beta A [Source:NCBI gene;Acc:281867]		3.53812			1	0.15941	0.445198	0.150005	0.0641576	0.0473523	3.85008	3.72868	0.317758	0.206003	1.56466
ENSBTAG00000024869	CX3CL1	C-X3-C motif chemokine ligand 1 [Source:VGNC Symbol;Acc:VGNC:52190]		3.54044			1	0.249628	0.183011	2.09619	8.33e-06	0.0632779	6.53838	3.67059	3.02119	0.938818	6.71509
ENSBTAG00000052632	TGIF2	TGFB induced factor homeobox 2 [Source:NCBI gene;Acc:535632]		3.54865			1	0.721639	0.430051	0.729306	0.745866	0.503305	11.2089	8.19971	2.87034	1.75167	4.64405
ENSBTAG00000002440	KIF7	kinesin family member 7 [Source:VGNC Symbol;Acc:VGNC:30608]		3.57685			1	0.00764571	0.00361916	0.0035733	0.0233402	0.0105945	0.130793	0.0449881	0.0319585	0.0384412	0.0810126
ENSBTAG00000005464	ADCY6	adenylate cyclase 6 [Source:VGNC Symbol;Acc:VGNC:25647]		3.59314			1	0.172644	0.152796	0.23553	0.281431	0.239601	3.50411	1.75963	0.407772	0.313524	2.0611
ENSBTAG00000016906	CYP27B1	cytochrome P450, family 27, subfamily B, polypeptide 1 [Source:NCBI gene;Acc:539630]		3.6233			1	0.0701845	0.375787	0.418429	0.0240165	0.116152	2.27867	4.95274	0.16502	0.209945	2.1403
ENSBTAG00000034075	SLC7A11	solute carrier family 7 member 11 [Source:VGNC Symbol;Acc:VGNC:34926]		3.62341			1	4.01041	2.84172	0.575649	5.34082	4.08265	42.2629	38.1216	15.0049	9.37438	10.1109
ENSBTAG00000011291	DLG3	discs large MAGUK scaffold protein 3 [Source:VGNC Symbol;Acc:VGNC:56704]		3.66565			1	0.0313147	0.0409036	0.122095	0.0630248	0.036757	0.78853	0.668112	0.111951	0.124683	0.782096
ENSBTAG00000019123	MEFV	MEFV innate immuity regulator, pyrin [Source:VGNC Symbol;Acc:VGNC:59348]		3.6772			1	0.456334	0.53166	0.330285	0.799222	0.840398	6.96716	8.32532	2.67568	2.09675	3.45812
ENSBTAG00000048971	0	0		3.68755			1	0	0	0.187735	0	0	2.60854	1.12869	0	0	1.58009
ENSBTAG00000001523	YES1	YES proto-oncogene 1, Src family tyrosine kinase [Source:VGNC Symbol;Acc:VGNC:37022]		3.71293			1	0.00560738	0.00558191	0	0.0118478	0.0110053	0.0495094	0.0875323	0.0108695	0	0.113688
ENSBTAG00000019545	0	spermatogenesis associated 13 [Source:NCBI gene;Acc:785769]		3.71951			1	0.00663442	0.00604532	0.00615736	0.0129972	0.0193443	0.149531	0.134528	0.0129673	0.0665214	0.0616555
ENSBTAG00000030593	0	raftlin, lipid raft linker 1 [Source:NCBI gene;Acc:506782]		3.80141			1	3.1939	0.0966541	0.676562	0.811728	1.22844	11.6764	10.9259	3.13941	2.54205	5.1827
ENSBTAG00000008479	CXCL13	C-X-C motif chemokine ligand 13 [Source:VGNC Symbol;Acc:VGNC:27849]		3.84149			1	0.0752113	0	0.0240925	0.0258028	0.0716709	0.814668	0.358664	0.517871	0.461263	0.429244
ENSBTAG00000009639	SMPD3	sphingomyelin phosphodiesterase 3 [Source:VGNC Symbol;Acc:VGNC:35031]		3.84977			1	0.476387	0.297018	1.46464	0.69586	0.314906	14.4336	5.09459	1.43297	0.559417	9.25423
ENSBTAG00000046821	0	0		3.86215			1	0.0991077	0.341153	0.245249	0.254654	0.192091	3.62229	2.89523	0.910346	0.582658	3.94812
ENSBTAG00000008428	UPP1	uridine phosphorylase 1 [Source:VGNC Symbol;Acc:VGNC:36688]		3.87107			1	3.07541	1.00466	3.25655	0.570609	0.546035	52.0754	32.8673	11.852	3.28363	19.8673
ENSBTAG00000010284	ETNPPL	ethanolamine-phosphate phospho-lyase [Source:VGNC Symbol;Acc:VGNC:53712]		3.88253			1	0	0	0.0110358	0	0	0.111304	0.188925	0.0215509	0.0117755	0.0797613
ENSBTAG00000020638	TIMP3	TIMP metallopeptidase inhibitor 3 [Source:VGNC Symbol;Acc:VGNC:35872]		3.90489			1	0.152728	0.187771	0.61207	0.100191	0.0660366	3.98885	7.86713	0.590341	0.745818	2.30083
ENSBTAG00000000861	ETV3L	ETS variant 3 like [Source:VGNC Symbol;Acc:VGNC:50172]		3.9277			1	0.0188212	0.0542408	0.0179548	0	0	1.0596	0.533391	0.105936	0	0.332865
ENSBTAG00000019754	CAVIN3	caveolae associated protein 3 [Source:VGNC Symbol;Acc:VGNC:26804]		3.95301			1	0.650427	0.517422	0.861643	0.339697	0.126651	12.8064	8.42534	2.05092	1.26036	10.2742
ENSBTAG00000052983	ARMCX4	armadillo repeat containing X-linked 4 [Source:NCBI gene;Acc:100139405]		3.97086			1	0.0026969	0.0156145	0.0337824	0.0222496	0.0231645	0.264463	0.182921	0.0356261	0.025065	0.211909
ENSBTAG00000019385	SCN3A	sodium voltage-gated channel alpha subunit 3 [Source:VGNC Symbol;Acc:VGNC:55078]		3.97188			1	0	0	0	0	0	0.0521985	0.018735	0.00804274	0.0089955	0.034672
ENSBTAG00000018644	PDZRN3	PDZ domain containing ring finger 3 [Source:VGNC Symbol;Acc:VGNC:32731]		4.04171			1	0.00631192	0.0181874	0.0719366	0.0130612	0.0892721	0.35786	0.446952	0.0238199	0.149011	0.443086
ENSBTAG00000003474	RAB15	RAB15, member RAS oncogene family [Source:VGNC Symbol;Acc:VGNC:33623]		4.05178			1	0.0619407	0.0270665	0.145207	0.0577699	0.00532185	2.06872	0.767271	0.471073	0.213836	0.902121
ENSBTAG00000046467	PTP4A3	protein tyrosine phosphatase 4A3 [Source:VGNC Symbol;Acc:VGNC:33525]		4.10874			1	0	0	0	0	0.00937375	0.143621	0.0434025	0.0188167	0.0307355	0.0838515
ENSBTAG00000046773	MCOLN2	mucolipin 2 [Source:VGNC Symbol;Acc:VGNC:31319]		4.11482			1	0.339461	1.05079	0.25101	0.381332	0.288808	13.1624	11.6438	1.9253	1.33893	4.22001
ENSBTAG00000039834	0	0		4.12655			1	0	0	0	0	0	0.791195	0.415904	0.468276	0.365962	0.388019
ENSBTAG00000048246	DPP4	dipeptidyl peptidase 4 [Source:NCBI gene;Acc:281122]		4.15303			1	0.0288566	0.0806814	0.0574611	0.292231	0.16383	1.41367	1.54191	0.412997	0.35091	0.61683
ENSBTAG00000012234	RHBG	Rh family B glycoprotein [Source:VGNC Symbol;Acc:VGNC:55671]		4.15435			1	0.0817054	0.0786757	0.0278196	0.230527	0.154888	2.15502	1.06842	0.274277	0.250451	0.689716
ENSBTAG00000016732	DNAI2	dynein axonemal intermediate chain 2 [Source:VGNC Symbol;Acc:VGNC:28130]		4.22532			1	0	0	0	0	0	0.0587067	0.0793312	0	0	0.0345746
ENSBTAG00000001966	PDGFRL	platelet derived growth factor receptor like [Source:VGNC Symbol;Acc:VGNC:32694]		4.23549			1	0	0.0134209	0	0.105665	0.200004	0.253377	0.244781	0.158707	0.143141	0.106859
ENSBTAG00000039122	PLA2G5	phospholipase A2 group V [Source:VGNC Symbol;Acc:VGNC:32963]		4.24564			1	0	0	0	0	0	0.188633	0.101196	0.0180961	0	0.0530702
ENSBTAG00000022244	ACTN3	actinin alpha 3 [Source:VGNC Symbol;Acc:VGNC:53654]		4.24646			1	0.631784	0.513305	1.23419	0.358887	0.303646	21.4021	14.9466	4.52111	2.45505	9.39633
ENSBTAG00000021217	COL11A1	collagen type XI alpha 1 chain [Source:VGNC Symbol;Acc:VGNC:50080]		4.26171			1	0.00583072	0.00558527	0.00277827	0	0	0.127583	0.11422	0.016414	0.0178841	0.116965
ENSBTAG00000008665	DIXDC1	DIX domain containing 1 [Source:VGNC Symbol;Acc:VGNC:28077]		4.28201			1	1.02997	0.83333	1.09362	0.839654	0.589119	29.3789	22.787	3.61517	1.96505	11.6924
ENSBTAG00000038154	HSH2D	hematopoietic SH2 domain containing [Source:VGNC Symbol;Acc:VGNC:29986]		4.28759			1	0.0183746	0.0357492	0.0338822	0.110065	0.152362	0.743547	0.700247	0.344046	0.0773173	0.775703
ENSBTAG00000030690	RADIL	Rap associating with DIL domain [Source:VGNC Symbol;Acc:VGNC:33691]		4.30481			1	0.0126493	0	0.00590205	0.0128667	0.0175804	0.141416	0.237195	0.035253	0.00635696	0.0980509
ENSBTAG00000003074	SLC16A6	solute carrier family 16 member 6 [Source:VGNC Symbol;Acc:VGNC:34692]		4.35657			1	0.0515326	0.0294013	0.154516	0.201212	0.106114	1.92433	1.75814	0.558751	0.387867	0.865509
ENSBTAG00000026610	SMCO3	single-pass membrane protein with coiled-coil domains 3 [Source:VGNC Symbol;Acc:VGNC:35007]		4.35945			1	0	0.0420974	0.0421524	0.0449766	0	0.741753	0.590018	0.167295	0.0450557	1.77783
ENSBTAG00000010236	CIDEB	cell death inducing DFFA like effector b [Source:VGNC Symbol;Acc:VGNC:27364]		4.36114			1	0.0825859	0.137663	0.0654351	0.0537284	0.0741587	2.08066	1.35618	0.13727	0.021188	3.17718
ENSBTAG00000039937	TNFRSF8	TNF receptor superfamily member 8 [Source:VGNC Symbol;Acc:VGNC:36170]		4.36352			1	0.0568868	0.0220832	0	0.0117423	0.0108578	0.441363	0.436177	0.0216452	0.0469451	0.475559
ENSBTAG00000001562	NFE2	nuclear factor, erythroid 2 [Source:VGNC Symbol;Acc:VGNC:32034]		4.47196			1	0.226278	0.00279044	0.500903	0.295137	0.351521	2.49294	2.86549	0.609935	1.1882	1.71673
ENSBTAG00000004337	PDE1B	phosphodiesterase 1B [Source:VGNC Symbol;Acc:VGNC:32672]		4.48519			1	0.228947	0.411955	0.373355	0	0	11.3865	7.6328	0.613907	0.253297	5.24312
ENSBTAG00000012684	CCL19	C-C motif chemokine ligand 19 [Source:VGNC Symbol;Acc:VGNC:26946]		4.48521			1	0	0	0.0372107	0.276863	0.223364	1.438	0.646262	0.183425	0.119029	0.25685
ENSBTAG00000044202	CNKSR2	connector enhancer of kinase suppressor of Ras 2 [Source:VGNC Symbol;Acc:VGNC:27505]		4.49756			1	0	0	0.00941904	0.00504081	0	0.161173	0.0915969	0.0415569	0.0101371	0.0596866
ENSBTAG00000011014	CHST3	carbohydrate sulfotransferase 3 [Source:VGNC Symbol;Acc:VGNC:27345]		4.52326			1	0.359248	0.0978687	0.111612	0.122696	0.152535	5.74444	4.47526	0.848665	0.52154	2.37169
ENSBTAG00000033381	0	0		4.56998			1	0.038279	0	0.114198	0.322814	0.151921	1.66774	1.22062	1.08279	0.204975	1.09865
ENSBTAG00000013406	CSRP2	cysteine and glycine rich protein 2 [Source:VGNC Symbol;Acc:VGNC:27774]		4.57383			1	0.0198118	0.226601	0.0372499	0.162601	0.167564	2.50986	2.10948	0.985257	0.381807	0.966823
ENSBTAG00000052665	CYP3A4	cytochrome P450, subfamily IIIA, polypeptide 4 [Source:NCBI gene;Acc:507988]		4.58218			1	4.93965	6.17722	1.7415	3.28683	7.96741	114.029	182.601	26.3844	18.6768	43.2767
ENSBTAG00000016928	0	PDZ domain containing 7 [Source:NCBI gene;Acc:511930]		4.59265			1	0.0530926	0.0201161	0	0.0107987	0.0197787	0.527734	0.511823	0.37522	0.182133	0.423377
ENSBTAG00000013950	TKDP4	trophoblast Kunitz domain protein 4 [Source:NCBI gene;Acc:404075]		4.60088			1	0	0.0803713	0.0804554	0	0	3.23574	1.9966	0	0	1.39509
ENSBTAG00000003327	RUFY4	RUN and FYVE domain containing 4 [Source:VGNC Symbol;Acc:VGNC:34216]		4.60711			1	0.02293	0.0285612	0.00710533	0.0771618	0.0493688	0.90833	0.582567	0.49746	0.109854	0.290489
ENSBTAG00000020647	RASL11B	RAS like family 11 member B [Source:VGNC Symbol;Acc:VGNC:33755]		4.60938			1	0.0341728	0.0441207	0.0547899	0	0.0108772	2.17917	1.27043	0.260359	0.200627	0.740239
ENSBTAG00000020992	RHBDL3	rhomboid like 3 [Source:VGNC Symbol;Acc:VGNC:33937]		4.64952			1	0.0166809	0.0160986	0	0.0517085	0.0637745	0.567129	0.532385	0.111385	0	0.282642
ENSBTAG00000000919	HEY2	hes related family bHLH transcription factor with YRPW motif 2 [Source:VGNC Symbol;Acc:VGNC:29829]		4.65105			1	0.00990182	0.00972592	0	0.0207229	0.0190747	0.512057	0.364743	0.0284471	0	0.110147
ENSBTAG00000020289	ZNF214	zinc finger protein 214 [Source:VGNC Symbol;Acc:VGNC:49994]		4.65202			1	0	0	0	0.0301839	0.0140045	0.178347	0.337183	0.0275177	0.0150191	0.103966
ENSBTAG00000008513	RHEX	regulator of hemoglobinization and erythroid cell expansion [Source:VGNC Symbol;Acc:VGNC:49539]		4.6642			1	0	0	0.108007	0.0391253	0	0.677502	0.465977	0.114387	0.282019	0.307845
ENSBTAG00000008160	MBOAT2	membrane bound O-acyltransferase domain containing 2 [Source:VGNC Symbol;Acc:VGNC:31287]		4.6709			1	0.0603677	0.0599202	0.118803	0.191122	0.0296053	3.12806	1.60244	0.850919	0.434337	2.26708
ENSBTAG00000009125	ALDH1A3	aldehyde dehydrogenase 1 family member A3 [Source:VGNC Symbol;Acc:VGNC:59168]		4.70714			1	0	0	0	0	0.0145338	0.139432	0.0836895	0.0504803	0.0078763	0.0822671
ENSBTAG00000007767	TBX15	T-box transcription factor 15 [Source:VGNC Symbol;Acc:VGNC:55686]		4.71863			1	0	0	0	0	0	0.0839684	0.120125	0.0262201	0.0212372	0.037746
ENSBTAG00000048312	0	0		4.75719			1	0	0	0	0	0.0373031	0.845849	0.901844	0.256309	0.11942	0.194579
ENSBTAG00000039080	SLC22A3	solute carrier family 22 member 3 [Source:VGNC Symbol;Acc:VGNC:34727]		4.76321			1	0.0265569	0.0257173	0	0.0138002	0	0.479525	0.771782	0.0612979	0.0443643	0.417881
ENSBTAG00000015182	STARD10	StAR related lipid transfer domain containing 10 [Source:VGNC Symbol;Acc:VGNC:35361]		4.79956			1	0.132762	0	8.98e-09	0	0	0.815809	0.718829	0.700531	0.274102	0.396651
ENSBTAG00000010671	GLI3	GLI family zinc finger 3 [Source:VGNC Symbol;Acc:VGNC:29401]		4.82066			1	0.00312995	0	0	0	0	0.106862	0.106082	0.00888141	0.0129487	0.0241249
ENSBTAG00000031135	CTXN3	cortexin 3 [Source:VGNC Symbol;Acc:VGNC:27827]		4.86057			1	0.287494	0	0.0525357	0.11252	0.121952	2.39069	1.10441	0.480692	0.16885	1.73961
ENSBTAG00000046922	TWIST1	twist family bHLH transcription factor 1 [Source:VGNC Symbol;Acc:VGNC:36525]		4.86242			1	0.259779	0.0470449	0.139606	0.117463	0.0153479	5.43325	3.52582	2.38283	0.771442	3.15535
ENSBTAG00000008555	P2RY10	P2Y receptor family member 10 [Source:VGNC Symbol;Acc:VGNC:32524]		4.86751			1	0.0713389	0.0715721	0.159856	0.284171	0.176793	4.28014	5.10673	1.57832	0.86417	1.57643
ENSBTAG00000010915	CRTC3	CREB regulated transcription coactivator 3 [Source:VGNC Symbol;Acc:VGNC:27729]		4.88071			1	0	0	0	0	0.0377849	0.127262	0.0844941	0.0358765	0.0384646	0.13805
ENSBTAG00000002918	RAD51	RAD51 recombinase [Source:VGNC Symbol;Acc:VGNC:33684]		4.9359			1	0.914323	0.0304993	0	0	3.64e-05	2.99809	2.19912	1.18057	0.199225	2.95087
ENSBTAG00000008091	SELENBP1	selenium binding protein 1 [Source:VGNC Symbol;Acc:VGNC:34422]		4.94893			1	1.88707	2.39886	2.38942	1.42844	2.2136	106.375	93.7585	11.7037	13.4251	36.5658
ENSBTAG00000007678	MKX	mohawk homeobox [Source:VGNC Symbol;Acc:VGNC:31493]		4.95297			1	0	0	0	0	0	0.124378	0.253849	1.26e-10	0	0.151702
ENSBTAG00000054063	CD1A	CD1a molecule [Source:NCBI gene;Acc:781011]		4.95828			1	1.36112	0.458489	1.99854	0.631112	0.465672	68.3565	31.6698	22.1923	6.75218	20.6518
ENSBTAG00000044158	LDLRAD3	low density lipoprotein receptor class A domain containing 3 [Source:VGNC Symbol;Acc:VGNC:30828]		4.97826			1	0.196275	0.104638	0.52733	0.210429	0.0789071	12.7934	6.99287	2.52063	1.09628	4.54518
ENSBTAG00000005682	UBAC2	UBA domain containing 2 [Source:VGNC Symbol;Acc:VGNC:36568]		4.98475			1	0.10398	0.0935692	0	0	0.0937785	2.32894	0.984667	0.373912	0.113641	1.84204
ENSBTAG00000024058	EGR4	early growth response 4 [Source:VGNC Symbol;Acc:VGNC:28369]		4.98775			1	0.0220688	0.00697548	0.0205849	0	0.00680878	0.804032	0.774077	0.129809	0.0963511	0.366149
ENSBTAG00000030962	EEFSEC	eukaryotic elongation factor, selenocysteine-tRNA specific [Source:VGNC Symbol;Acc:VGNC:28337]		4.99871			1	0.147505	0	0	0.588022	0.304466	0.56469	0.637633	0.404603	0.0878062	0.680451
ENSBTAG00000032657	TEAD1	TEA domain transcription factor 1 [Source:VGNC Symbol;Acc:VGNC:35724]		5.01721			1	0	0	0	0.0784112	0.0354069	0.0910378	0.207175	0	0	0.0686838
ENSBTAG00000017322	ARL14	ADP ribosylation factor like GTPase 14 [Source:VGNC Symbol;Acc:VGNC:26139]		5.06337			1	0	0	0	0	0	1.44698	1.5176	0.0540155	0.057065	0.368445
ENSBTAG00000008338	PLCB1	phospholipase C beta 1 [Source:VGNC Symbol;Acc:VGNC:32980]		5.13649			1	0.028157	0	0.0165713	0.0419005	0.0372769	0.556121	0.426665	0.141235	0.0291726	0.408538
ENSBTAG00000011736	IGF2BP1	insulin like growth factor 2 mRNA binding protein 1 [Source:VGNC Symbol;Acc:VGNC:30079]		5.15742			1	0	0	0	0.0200395	0	0.294038	0.275611	0.0732437	0.0398007	0.0648491
ENSBTAG00000005244	RASL11A	RAS like family 11 member A [Source:VGNC Symbol;Acc:VGNC:33754]		5.17173			1	0.454865	0.0906184	0.448901	0.271883	0.178974	18.4816	13.8542	1.35807	0.852638	4.40071
ENSBTAG00000005475	TCAF2	TRPM8 channel associated factor 2 [Source:NCBI gene;Acc:510320]		5.18017			1	0.0899464	0.0481499	0.0286427	0.0360427	0.0331788	1.87602	1.79696	0.474483	0.246855	2.33022
ENSBTAG00000021924	PLA2G4E	phospholipase A2 group IVE [Source:VGNC Symbol;Acc:VGNC:55135]		5.1828			1	0	0	0	0	0	0.235673	0.133014	0.0369172	0.0332964	0.10125
ENSBTAG00000005404	MSC	musculin [Source:VGNC Symbol;Acc:VGNC:31691]		5.27764			1	0.0115318	0.0761621	0.0107275	0.116812	0.0106777	1.21875	1.37133	0.159992	0.173684	0.8726
ENSBTAG00000017043	GPR1	G protein-coupled receptor 1 [Source:VGNC Symbol;Acc:VGNC:29542]		5.30627			1	0	0	0	0	0	0.286234	0.544972	0.0778015	0.127904	0.138195
ENSBTAG00000010944	LRRC49	leucine rich repeat containing 49 [Source:VGNC Symbol;Acc:VGNC:55120]		5.33064			1	0	0	0	0.173504	0.0210791	0.274765	0.101484	0	0	0.178454
ENSBTAG00000011940	ZNF831	zinc finger protein 831 [Source:VGNC Symbol;Acc:VGNC:37355]		5.35259			1	0	0	0	0	0	0.18118	0.0282919	0.0122365	0	0.0558201
ENSBTAG00000044061	FAXC	failed axon connections homolog, metaxin like GST domain containing [Source:VGNC Symbol;Acc:VGNC:53792]		5.389			1	0	0	0.0572582	0.0204927	0	1.10822	0.614168	0.244082	0.16135	0.730072
ENSBTAG00000055014	SH3BGRL2	SH3 domain binding glutamate rich protein like 2 [Source:NCBI gene;Acc:785404]		5.39923			1	0.128052	0	0	0	0	0.465168	0.896563	0.291186	0.276379	0.418554
ENSBTAG00000033319	CD200	CD200 molecule [Source:VGNC Symbol;Acc:VGNC:27010]		5.4319			1	0.182931	0	0.0496725	0.400777	0.174644	3.11788	2.34764	0.221191	0.374043	1.94531
ENSBTAG00000013888	FOXA1	forkhead box A1 [Source:VGNC Symbol;Acc:VGNC:29077]		5.43386			1	0	0	0	0	0	0.446138	0.0741528	0.0141495	0.0154863	0.130443
ENSBTAG00000017466	HCN4	hyperpolarization activated cyclic nucleotide gated potassium channel 4 [Source:VGNC Symbol;Acc:VGNC:29779]		5.45378			1	0	0	0.009255	0	0	0.47143	0.171187	0.00926297	0.00503287	0.0771246
ENSBTAG00000009292	TMEM100	transmembrane protein 100 [Source:VGNC Symbol;Acc:VGNC:35941]		5.47842			1	0	0	0	0	0	0.774767	0.156633	0	0.0366178	0.505083
ENSBTAG00000014921	IL6	interleukin 6 [Source:VGNC Symbol;Acc:VGNC:30166]		5.52096			1	0.387379	0.625698	0.149997	1.04371	1.42003	15.5753	25.4479	1.52022	2.41567	12.938
ENSBTAG00000001298	STAMBPL1	STAM binding protein like 1 [Source:VGNC Symbol;Acc:VGNC:35357]		5.53471			1	0	0	0.259785	0.0980564	0.384694	0.915854	0.856952	0.394998	0.0949758	0.738194
ENSBTAG00000018165	RIPOR2	RHO family interacting cell polarization regulator 2 [Source:VGNC Symbol;Acc:VGNC:54232]		5.55363			1	3.21e-09	0	0.218211	0.449156	0.616232	0.810648	0.459943	0.655255	0.619861	0.625449
ENSBTAG00000005359	TGFB2	transforming growth factor beta 2 [Source:VGNC Symbol;Acc:VGNC:35802]		5.55528			1	0	0.0213473	0	0.0113792	0.105252	0.827396	0.207248	0.10448	0.085685	0.553583
ENSBTAG00000011706	TNR	tenascin R [Source:VGNC Symbol;Acc:VGNC:36202]		5.58479			1	0	0	0	0	0	0.157702	0.0702557	0.0606385	0.266109	0.106101
ENSBTAG00000002605	0	tripartite motif containing 16 [Source:NCBI gene;Acc:100848152]		5.59281			1	0	0.0416622	0.0068539	0.0148597	0.0272762	0.738532	0.705759	0.05432	0.029485	0.408579
ENSBTAG00000047336	0	thyrotropin-releasing hormone receptor-like [Source:NCBI gene;Acc:100847115]		5.60921			1	0	0.0504586	0.0331061	0	0	1.7069	2.18082	0.611143	0.286984	0.723994
ENSBTAG00000004515	KCNK1	potassium two pore domain channel subfamily K member 1 [Source:VGNC Symbol;Acc:VGNC:30465]		5.67669			1	0	0.0135886	0.0405551	0.0146102	0	1.15833	1.01805	0.226763	0.0433153	0.846834
ENSBTAG00000016246	DUOX1	dual oxidase 1 [Source:VGNC Symbol;Acc:VGNC:28241]		5.67977			1	0.00478693	0	0	0	0.00794579	0.326302	0.176562	0.116572	0.0572187	0.0636732
ENSBTAG00000010581	MAGI1	membrane associated guanylate kinase, WW and PDZ domain containing 1 [Source:VGNC Symbol;Acc:VGNC:31147]		5.68294			1	0	0	0	0	0	0.274149	0.0761095	0	0	0.0952271
ENSBTAG00000021133	TENM3	teneurin transmembrane protein 3 [Source:VGNC Symbol;Acc:VGNC:35743]		5.688			1	0	0	0	0.00258082	0.00475808	0.152748	0.0554866	0.0165871	0.00778142	0.0343374
ENSBTAG00000010850	SERTAD4	SERTA domain containing 4 [Source:VGNC Symbol;Acc:VGNC:34486]		5.7209			1	0	0	0.0229254	0	0	0.366076	0.324083	0.127148	0.0409884	0.536776
ENSBTAG00000017187	TMEM255A	transmembrane protein 255A [Source:VGNC Symbol;Acc:VGNC:36064]		5.75831			1	0	0.186303	0	0	0	1.74936	0.978502	0.511393	0.0591727	1.83379
ENSBTAG00000010411	ADAMTS8	ADAM metallopeptidase with thrombospondin type 1 motif 8 [Source:VGNC Symbol;Acc:VGNC:25629]		5.76287			1	0.18928	0.0422427	0.185629	0.170784	0.0738228	9.87549	8.01038	1.7191	0.912785	3.66401
ENSBTAG00000017223	MEST	mesoderm specific transcript [Source:VGNC Symbol;Acc:VGNC:31393]		5.87848			1	0.194048	0.0662117	0.225405	0.0905944	0.214448	10.3686	13.5942	1.35745	1.24531	5.57667
ENSBTAG00000045729	0	small integral membrane protein 20 [Source:NCBI gene;Acc:101904614]		5.88842			1	0	0	0	0	0	11.422	15.8106	0	0	9.54285
ENSBTAG00000022819	ONECUT2	one cut homeobox 2 [Source:VGNC Symbol;Acc:VGNC:56369]		5.89404			1	0	0.0106311	0	0.034166	0.0207599	0.398699	0.324598	0.146547	0.0340254	0.747598
ENSBTAG00000011173	FAM189A2	family with sequence similarity 189 member A2 [Source:VGNC Symbol;Acc:VGNC:54429]		5.90626			1	0.0103725	0	0	0.0105828	0.0096632	0.838742	0.678365	0.144676	0.104678	0.166273
ENSBTAG00000013744	SYNPO	synaptopodin [Source:VGNC Symbol;Acc:VGNC:35530]		5.91632			1	0	0.00433515	0	0	0.00427139	0.275433	0.193024	0	0.0465185	0.143992
ENSBTAG00000021965	SUB1	SUB1 regulator of transcription [Source:VGNC Symbol;Acc:VGNC:35454]		5.93959			1	0.42669	0	0	0	0.198036	4.63033	5.8479	0.88426	0.844468	2.86482
ENSBTAG00000003667	TLN2	talin 2 [Source:VGNC Symbol;Acc:VGNC:35898]		5.95818			1	0	0.0241242	0	0	0.00320681	0.348762	0.235472	0.0380399	0.0674168	0.135241
ENSBTAG00000025898	TBC1D8	TBC1 domain family member 8 [Source:VGNC Symbol;Acc:VGNC:35645]		6.00108			1	1.35e-06	0.162794	0	0.30064	0.448234	1.16156	0.697622	0.663316	0.222291	0.478593
ENSBTAG00000049666	CYP3A5	cytochrome P450, subfamily IIIA (niphedipine oxidase), polypeptide 4 [Source:NCBI gene;Acc:282214]		6.0365			1	0	0	0	0	0	0.456178	0.360801	0.0266897	0.0444533	0.445642
ENSBTAG00000000616	GPR161	G protein-coupled receptor 161 [Source:VGNC Symbol;Acc:VGNC:29566]		6.03695			1	0	0	0	0.0403821	0	0.431158	0.690729	0.145141	0	0.203132
ENSBTAG00000012007	SOCS2	suppressor of cytokine signaling 2 [Source:VGNC Symbol;Acc:VGNC:35120]		6.11763			1	0.132433	0.150193	0.131411	0.136824	0.247362	15.4294	12.7096	5.77305	1.9656	5.97471
ENSBTAG00000009357	IL34	interleukin 34 [Source:VGNC Symbol;Acc:VGNC:30156]		6.19128			1	0	0	0	0	0	0.656128	0.326046	0.0470208	0	0.27337
ENSBTAG00000012729	ARHGEF9	Cdc42 guanine nucleotide exchange factor 9 [Source:VGNC Symbol;Acc:VGNC:26122]		6.19225			1	0	0.181892	0	0	0	2.20504	2.06851	0.162654	7.91e-09	1.02762
ENSBTAG00000050542	0	keratin-associated protein 9-9-like [Source:NCBI gene;Acc:100848850]		6.1936			1	0	0	0	0	0	1.61789	1.2185	0.0502435	0.0701083	1.85825
ENSBTAG00000001083	MAP3K20	mitogen-activated protein kinase kinase kinase 20 [Source:NCBI gene;Acc:519251]		6.24928			1	8.7e-06	0	0	0	0	0.462737	0.159099	0	0	0.522931
ENSBTAG00000048354	0	0		6.28721			1	0	0.811823	0.180936	0.0249165	0	11.0661	8.98274	2.35191	1.61616	10.0886
ENSBTAG00000024801	RANBP17	RAN binding protein 17 [Source:VGNC Symbol;Acc:VGNC:57359]		6.29935			1	0	0	0	0.054156	0	0.213592	0.378951	0.141443	0.0540428	0.332916
ENSBTAG00000014605	ETV6	ETS variant transcription factor 6 [Source:VGNC Symbol;Acc:VGNC:28632]		6.35229			1	0.949504	1.74e-05	0.0040165	0	0	6.08879	3.28667	0.105168	0	2.70853
ENSBTAG00000000125	SPATA5	spermatogenesis associated 5 [Source:VGNC Symbol;Acc:VGNC:35187]		6.36788			1	3.44e-06	0.474032	5.86e-07	0.414325	0.508142	1.60499	2.02835	0.710236	0.755058	2.02375
ENSBTAG00000053813	SPATS1	spermatogenesis associated serine rich 1 [Source:NCBI gene;Acc:511533]		6.37596			1	0	0	0	0	0	0.591607	0.708785	0	0	0.128935
ENSBTAG00000008842	JPH1	junctophilin 1 [Source:VGNC Symbol;Acc:VGNC:30380]		6.38147			1	0	0.0147675	0	0	0.00964075	0.554037	0.512283	0.0769847	0.0814143	0.265439
ENSBTAG00000014760	FOXE1	forkhead box E1 [Source:VGNC Symbol;Acc:VGNC:29083]		6.40957			1	0.0378056	0.018192	0.0177865	0.0389032	0.0354881	1.9163	3.85996	0.641198	0.618443	2.96372
ENSBTAG00000003049	MICALL2	MICAL like 2 [Source:VGNC Symbol;Acc:VGNC:31460]		6.43495			1	0.0407465	0	0	0.029524	0.0375941	0.965201	0.611148	0.301417	0.110722	0.400816
ENSBTAG00000015467	FAM184A	family with sequence similarity 184 member A [Source:VGNC Symbol;Acc:VGNC:28765]		6.46319			1	0	0.209659	0	0.365181	0.249795	2.098	1.39726	0.570736	0.426955	0.649
ENSBTAG00000017162	STK39	serine/threonine kinase 39 [Source:VGNC Symbol;Acc:VGNC:56152]		6.46454			1	0	0.316403	0.524775	0.161489	0	14.3317	7.71254	3.91378	1.28763	9.29671
ENSBTAG00000002854	TMEM63A	transmembrane protein 63A [Source:VGNC Symbol;Acc:VGNC:36103]		6.48614			1	0.83031	0.000305185	8.22e-08	0.000185163	0	2.37327	1.80082	1.20517	1.59571	3.16137
ENSBTAG00000039195	NHS	NHS actin remodeling regulator [Source:VGNC Symbol;Acc:VGNC:32071]		6.49064			1	0.0677662	0.0251015	0	0.0610531	0.0248572	1.08645	1.89356	0.394416	0.357355	1.81125
ENSBTAG00000032881	SLCO5A1	solute carrier organic anion transporter family member 5A1 [Source:VGNC Symbol;Acc:VGNC:34956]		6.49077			1	0	0	0	0	0	0.488204	0.237611	0	0	0.214513
ENSBTAG00000008275	GREB1L	GREB1 like retinoic acid receptor coactivator [Source:VGNC Symbol;Acc:VGNC:53641]		6.50654			1	0.000378968	0	0.160541	0	6.1e-05	1.16363	0.621808	0.493472	0.296807	0.62088
ENSBTAG00000032077	KCND2	potassium voltage-gated channel subfamily D member 2 [Source:VGNC Symbol;Acc:VGNC:30435]		6.77575			1	0	0	0	0	0	0.960406	0.595825	0.178931	0.0851299	0.505766
ENSBTAG00000010788	PPM1E	protein phosphatase, Mg2+/Mn2+ dependent 1E [Source:VGNC Symbol;Acc:VGNC:33211]		6.86887			1	0.0186029	0	0.00881722	0.0477259	0.0261987	1.9333	1.36386	0.243728	0.132407	0.936691
ENSBTAG00000016944	ADORA2A	adenosine A2a receptor [Source:VGNC Symbol;Acc:VGNC:25687]		6.91416			1	0	0	0.0186717	0.0948773	0	1.43589	0.477236	0.227005	0.0980047	0.609149
ENSBTAG00000017846	F11R	F11 receptor [Source:VGNC Symbol;Acc:VGNC:50010]		7.01085			1	0.00814623	0.0784974	0.104074	0.0618294	0.0799212	6.70211	7.33587	0.16972	0.14214	5.41593
ENSBTAG00000017797	LY75	lymphocyte antigen 75 [Source:NCBI gene;Acc:407236]		7.02582			1	0.177449	0.0807483	0.0894514	0.456484	0.432344	29.2445	16.1724	1.68411	0.973149	8.17568
ENSBTAG00000007378	CLIP4	CAP-Gly domain containing linker protein family member 4 [Source:VGNC Symbol;Acc:VGNC:27447]		7.16739			1	0	0.0690659	0	0.0633805	0	2.19523	2.55555	0.972025	0.503749	1.19701
ENSBTAG00000018307	SEMA3F	semaphorin 3F [Source:VGNC Symbol;Acc:VGNC:34431]		7.17962			1	0	0	0	0	0	0.473404	0.271175	0.157464	0.0291367	0.274728
ENSBTAG00000014486	ATP12A	ATPase H+/K+ transporting non-gastric alpha2 subunit [Source:VGNC Symbol;Acc:VGNC:26276]		7.67493			1	0	0	0	0	0	0.76981	0.413949	0	0	0.243135
ENSBTAG00000012858	NT5C2	5'-nucleotidase, cytosolic II [Source:VGNC Symbol;Acc:VGNC:32291]		7.68013			1	4.33e-08	0	0.418016	0.000165334	4.83e-05	6.33569	5.1271	0	0.110597	7.46973
ENSBTAG00000004641	PLEKHA6	pleckstrin homology domain containing A6 [Source:VGNC Symbol;Acc:VGNC:59357]		7.82618			1	0	0	0	0	0.0215373	0.315633	0.26187	0.091343	0.0255438	0.298494
ENSBTAG00000027442	NFIB	nuclear factor I B [Source:VGNC Symbol;Acc:VGNC:32039]		7.83994			1	0	0	0	0	0	2.36265	0.959718	0.305179	0.0788543	0.876462
ENSBTAG00000052160	KRTAP9-1	keratin associated protein 9-1 [Source:NCBI gene;Acc:788138]		7.86949			1	0	0	0	0	0	1.64679	2.24702	0.226584	0.077846	1.52234
ENSBTAG00000012251	MTR	5-methyltetrahydrofolate-homocysteine methyltransferase [Source:VGNC Symbol;Acc:VGNC:31749]		7.88133			1	0	0	4.64e-07	3.21e-06	0.275494	0.631904	1.05304	0	0	0.510985
ENSBTAG00000052140	AIF1L	allograft inflammatory factor 1 like [Source:NCBI gene;Acc:617493]		7.90126			1	0	0.0109752	0.0163358	0	0	3.51996	2.16738	0.188347	0.0997216	1.554
ENSBTAG00000018290	IL9	interleukin 9 [Source:VGNC Symbol;Acc:VGNC:30171]		7.90584			1	0	0	0	0	0	12.9101	19.3249	2.24134	0	5.17505
ENSBTAG00000010119	ALDH1A2	aldehyde dehydrogenase 1 family member A2 [Source:VGNC Symbol;Acc:VGNC:25809]		7.92919			1	0	0	0	0	0	0.914878	0.710876	0.147082	0.0617583	0.377847
ENSBTAG00000051563	0	keratin associated protein 9-2 [Source:NCBI gene;Acc:100138157]		8.15754			1	0	0	0	0	0	5.07035	6.3864	0.416148	0.321743	7.10153
ENSBTAG00000005570	WNT8A	Wnt family member 8A [Source:VGNC Symbol;Acc:VGNC:36964]		8.22094			1	0	0	0	0	0	5.00547	3.69851	0.064362	0.0234618	2.29035
ENSBTAG00000005596	IGFBP2	insulin like growth factor binding protein 2 [Source:VGNC Symbol;Acc:VGNC:30084]		8.29889			1	0	0	0	0	0	2.61005	1.00408	0.0753953	0.081745	3.36054
ENSBTAG00000003544	S1PR5	sphingosine-1-phosphate receptor 5 [Source:VGNC Symbol;Acc:VGNC:34256]		8.33226			1	0	0.0168639	0.0415643	0.0270099	0.0165513	7.70885	5.10926	0.610729	0.332474	3.94397
ENSBTAG00000009012	PTX3	pentraxin 3 [Source:VGNC Symbol;Acc:VGNC:33566]		8.35197			1	0	0.0246961	0.024523	0.246286	0.193794	5.35976	5.97737	0.180834	0.245394	7.37971
ENSBTAG00000006720	GJA5	gap junction protein alpha 5 [Source:VGNC Symbol;Acc:VGNC:29374]		8.3946			1	0	0	0	0	0.00888319	2.48217	0.918694	0.0791689	0	1.78191
ENSBTAG00000016345	IL2RB	interleukin 2 receptor subunit beta [Source:VGNC Symbol;Acc:VGNC:30152]		8.39502			1	0.000717834	0.656883	0.367095	0.97896	0.712837	35.0831	35.126	3.03095	2.60974	26.2838
ENSBTAG00000000460	SYTL2	synaptotagmin like 2 [Source:NCBI gene;Acc:614406]		8.53349			1	0	0	0.0166914	0	0.0107612	2.64484	1.68635	0.202097	0.0178164	1.95259
ENSBTAG00000053661	0	0		8.82055			1	0	0	0	0	0	49.808	38.5999	0.600775	0.315324	24.398
ENSBTAG00000007216	DPF1	double PHD fingers 1 [Source:VGNC Symbol;Acc:VGNC:28175]		9.64482			1	0	0	0	0	0	9.57408	2.33107	1.88091	0.763954	4.87852
ENSBTAG00000003020	SSC4D	scavenger receptor cysteine rich family member with 4 domains [Source:VGNC Symbol;Acc:VGNC:35309]		9.9507			1	0	0	0	0	0.0551757	5.09552	4.94232	0.381582	0.157548	3.03249
ENSBTAG00000013429	CLEC4G	C-type lectin domain family 4 member G [Source:VGNC Symbol;Acc:VGNC:27434]		12.2219			1	0	0	0.0286843	0	0	56.0021	110.842	3.09206	4.65269	37.1665
ENSBTAG00000015133	CCR7	C-C motif chemokine receptor 7 [Source:VGNC Symbol;Acc:VGNC:26987]		13.3199			1	0	0.00887582	0.0439295	0.0758735	0.00875887	213.57	143.49	13.9478	5.35174	112.723
ENSBTAG00000020802	0	dynein axonemal heavy chain 12 [Source:NCBI gene;Acc:100847355]				-6.43125	1	0.0961587	0.147023	0.0867445	0.0482686	0.0870958	0.0141309	0.0369688	1.34e-10	0	0.0475511
ENSBTAG00000017504	FAIM2	Fas apoptotic inhibitory molecule 2 [Source:VGNC Symbol;Acc:VGNC:28710]				-3.30546	1	0.455421	0.67094	0.749374	0.0797797	0.147556	0.184492	0.150555	0.0383481	0.115803	0.329745
ENSBTAG00000012265	VWF	von Willebrand factor [Source:VGNC Symbol;Acc:VGNC:36860]				-3.01452	1	15.8177	67.4593	44.9269	4.32383	7.5778	15.9917	24.1685	3.25461	7.39142	25.9415
ENSBTAG00000019574	MAPK12	mitogen-activated protein kinase 12 [Source:VGNC Symbol;Acc:VGNC:31215]				-2.68014	1	3.75529	1.8314	3.76599	0.695761	0.627676	3.40785	1.96118	0.519811	0.455276	3.21328
ENSBTAG00000002858	ACBD7	acyl-CoA binding domain containing 7 [Source:VGNC Symbol;Acc:VGNC:25533]				-2.46869	1	27.5198	44.1068	57.12	10.9115	8.23844	14.7679	10.1543	9.06518	6.97714	32.545
ENSBTAG00000008507	SPHK1	sphingosine kinase 1 [Source:VGNC Symbol;Acc:VGNC:35210]				-2.41657	1	34.8222	56.9425	62.5921	13.4955	13.7723	27.7181	14.4904	9.57647	10.643	41.5212
ENSBTAG00000019164	RHOBTB1	Rho related BTB domain containing 1 [Source:VGNC Symbol;Acc:VGNC:33945]				-2.36236	1	1.91051	1.48527	1.67764	0.951621	0.409343	0.898902	0.896373	0.421808	0.284982	0.44893
ENSBTAG00000014357	SDC2	syndecan 2 [Source:VGNC Symbol;Acc:VGNC:34379]				-2.00355	1	17.0259	32.4642	21.3028	8.93559	9.52642	12.9068	12.8901	5.51689	6.63772	14.6104
ENSBTAG00000002346	HSD3B7	hydroxy-delta-5-steroid dehydrogenase, 3 beta- and steroid delta-isomerase 7 [Source:VGNC Symbol;Acc:VGNC:29978]				-1.80727	1	28.7841	61.8425	43.2993	15.6033	18.0112	17.8601	18.6789	12.2858	14.103	27.2701
ENSBTAG00000004344	ACSL1	acyl-CoA synthetase long chain family member 1 [Source:VGNC Symbol;Acc:VGNC:25564]				-1.73034	1	7.81543	4.20753	6.34488	2.63981	2.38968	4.55464	2.76044	2.42832	1.49856	5.14061
ENSBTAG00000012117	ATP6AP1	ATPase H+ transporting accessory protein 1 [Source:VGNC Symbol;Acc:VGNC:26306]				-1.69318	1	139.966	85.6349	83.5308	49.9298	57.3006	58.1045	78.1285	33.9289	32.6505	69.7075
ENSBTAG00000008248	0	dystrophin [Source:NCBI gene;Acc:537655]				-1.66707	1	3.29093	4.76557	4.63184	1.40639	1.73426	2.45937	3.13645	1.28761	1.58675	4.99607
ENSBTAG00000015195	NPC1	NPC intracellular cholesterol transporter 1 [Source:VGNC Symbol;Acc:VGNC:32194]				-1.61689	1	14.1798	13.5716	7.66471	4.45398	5.41861	7.09023	7.04127	3.15497	5.30187	9.69007
ENSBTAG00000022294	FADS1	fatty acid desaturase 1 [Source:VGNC Symbol;Acc:VGNC:28701]				-1.55729	1	20.0143	33.0032	33.8155	10.4506	12.8244	65.9862	31.8306	10.9944	9.72439	48.5478
ENSBTAG00000021875	SLC41A2	solute carrier family 41 member 2 [Source:VGNC Symbol;Acc:VGNC:34874]				-1.5472	1	6.52509	6.9118	5.24591	4.12682	3.75323	4.59762	5.80025	3.58437	1.41369	5.64982
ENSBTAG00000000032	ABI3	ABI family member 3 [Source:VGNC Symbol;Acc:VGNC:25507]				-1.50622	1	27.7938	29.4127	18.6514	9.25832	14.2891	15.4271	20.1436	7.39956	12.3182	16.7075
ENSBTAG00000017574	LMNA	lamin A/C [Source:VGNC Symbol;Acc:VGNC:30929]				-1.42712	1	123.813	172.902	172.533	89.698	76.3542	70.7309	72.8319	69.6459	54.7905	99.8725
ENSBTAG00000052504	KLF2	Kruppel like factor 2 [Source:NCBI gene;Acc:520939]				-1.42136	1	23.2452	14.972	23.647	11.4693	11.6617	13.3172	11.5053	8.35631	7.8919	18.1427
ENSBTAG00000008114	CD99	CD99 molecule [Source:VGNC Symbol;Acc:VGNC:50554]				-1.4125	1	145.106	98.1701	146.837	67.7842	67.1659	60.8348	51.2949	47.1498	55.4845	99.1076
ENSBTAG00000004542	FAM78A	family with sequence similarity 78 member A [Source:VGNC Symbol;Acc:VGNC:28829]				-1.33921	1	29.7224	25.4409	23.3329	17.3127	15.131	13.4166	15.0868	9.85197	12.4895	12.7062
ENSBTAG00000015337	TSPAN12	tetraspanin 12 [Source:VGNC Symbol;Acc:VGNC:36427]				-1.33017	1	25.0629	41.2268	36.8332	20.4903	17.566	21.1439	16.0408	16.7626	12.4046	27.1701
ENSBTAG00000005015	SFXN3	sideroflexin 3 [Source:VGNC Symbol;Acc:VGNC:34532]				-1.32103	1	44.3119	69.3946	79.0127	27.3641	28.5778	37.4958	35.8063	25.861	28.1702	49.8291
ENSBTAG00000015089	LGALS1	galectin 1 [Source:VGNC Symbol;Acc:VGNC:30850]				-1.3054	1	2608.14	2331.51	3510.23	1243.67	1383.71	2086.42	1839.48	1107.19	1295.64	2729.79
ENSBTAG00000003604	ADAMTSL4	ADAMTS like 4 [Source:VGNC Symbol;Acc:VGNC:25632]				-1.28063	1	3.10962	3.55088	2.47502	1.83646	1.37979	2.95749	2.87661	1.31134	1.37018	2.20072
ENSBTAG00000011088	SLC6A6	solute carrier family 6 member 6 [Source:VGNC Symbol;Acc:VGNC:34922]				-1.27904	1	16.9489	19.2993	15.2551	10.3255	12.865	12.0646	10.3407	7.56331	7.66719	9.99756
ENSBTAG00000005115	SLC31A2	solute carrier family 31 member 2 [Source:VGNC Symbol;Acc:VGNC:34814]				-1.26823	1	321.329	247.958	186.853	125.323	159.106	112.293	172.26	87.8816	139.749	141.173
ENSBTAG00000019461	NUMBL	NUMB like endocytic adaptor protein [Source:VGNC Symbol;Acc:VGNC:32349]				-1.25403	1	2.03078	2.2408	1.50684	0.994037	0.800495	1.37863	1.13231	0.994594	0.741886	0.803853
ENSBTAG00000004650	ZNF516	zinc finger protein 516 [Source:VGNC Symbol;Acc:VGNC:37294]				-1.22581	1	3.90445	5.12617	4.88626	3.0432	2.05816	2.48502	2.28024	2.10445	2.15308	3.20953
ENSBTAG00000007592	RARG	retinoic acid receptor gamma [Source:VGNC Symbol;Acc:VGNC:33730]				-1.22351	1	4.46806	4.52535	4.8585	2.58725	2.32552	2.33922	2.47813	1.89784	2.39966	3.31791
ENSBTAG00000032331	SLC48A1	solute carrier family 48 member 1 [Source:VGNC Symbol;Acc:VGNC:34889]				-1.21446	1	84.6003	117.226	90.0434	56.5379	59.3011	46.0349	42.8504	42.1895	48.179	70.308
ENSBTAG00000020791	RAPGEF1	Rap guanine nucleotide exchange factor 1 [Source:VGNC Symbol;Acc:VGNC:33722]				-1.20504	1	53.4807	61.0084	47.6786	31.2802	29.515	32.2123	34.4131	26.5683	23.8503	33.0276
ENSBTAG00000048041	ACTR1B	actin related protein 1B [Source:VGNC Symbol;Acc:VGNC:54395]				-1.14872	1	11.7247	10.6014	8.07766	5.6335	6.03468	7.14071	5.26944	5.03874	4.68317	7.13864
ENSBTAG00000021635	NUDT17	nudix hydrolase 17 [Source:VGNC Symbol;Acc:VGNC:32332]				-1.12328	1	15.8724	15.4111	15.1699	8.44321	8.58264	8.93978	8.491	7.28457	8.0794	9.59538
ENSBTAG00000027444	SVIL	supervillin [Source:NCBI gene;Acc:281509]				-1.11691	1	5.74395	4.44099	3.81373	3.42534	2.55741	4.30694	3.24153	1.82429	2.92459	3.21346
ENSBTAG00000016904	MARCHF9	membrane associated ring-CH-type finger 9 [Source:VGNC Symbol;Acc:VGNC:31243]				-1.11466	1	5.82772	6.22942	6.75104	3.26612	3.56404	5.80925	5.36908	3.31924	2.92166	5.36137
ENSBTAG00000003014	TRPV2	transient receptor potential cation channel subfamily V member 2 [Source:VGNC Symbol;Acc:VGNC:36398]				-1.10167	1	354.928	333.021	235.82	143.867	182.217	170.485	190.587	134.886	171.692	165.834
ENSBTAG00000019692	BCL2L2	BCL2 like 2 [Source:VGNC Symbol;Acc:VGNC:55105]				-1.09968	1	7.84343	8.36518	7.50073	4.22466	4.63221	10.5077	9.11703	4.04449	3.93358	9.25369
ENSBTAG00000008468	AGAP3	ArfGAP with GTPase domain, ankyrin repeat and PH domain 3 [Source:VGNC Symbol;Acc:VGNC:25721]				-1.09784	1	14.0827	13.2006	9.9582	6.16649	7.90919	9.34357	9.83779	6.60566	5.77547	7.54455
ENSBTAG00000008789	HMG20B	high mobility group 20B [Source:NCBI gene;Acc:507723]				-1.0886	1	66.5585	87.2077	70.524	37.2445	42.2944	71.1314	72.3208	38.0609	36.9257	58.1035
ENSBTAG00000037726	PLCD1	phospholipase C delta 1 [Source:VGNC Symbol;Acc:VGNC:32984]				-1.08625	1	25.8543	24.1216	30.0269	15.1704	17.1787	13.0952	14.4619	12.9401	14.0177	18.8878
ENSBTAG00000007981	GRK5	G protein-coupled receptor kinase 5 [Source:VGNC Symbol;Acc:VGNC:29656]				-1.08087	1	1.73238	1.85805	2.23997	1.07122	1.2027	1.02323	1.03772	1.00261	0.95836	1.37337
ENSBTAG00000013023	MAP4K4	mitogen-activated protein kinase kinase kinase kinase 4 [Source:VGNC Symbol;Acc:VGNC:31207]				-1.07305	1	40.2449	66.1305	51.4797	28.1952	29.5486	48.4248	46.4798	25.5875	27.0715	50.5775
ENSBTAG00000001511	BCL6	BCL6 transcription repressor [Source:VGNC Symbol;Acc:VGNC:58471]				-1.0721	1	26.6052	38.1518	27.7868	18.2209	15.625	20.0824	21.5424	16.156	15.1315	21.8835
ENSBTAG00000046672	ZDHHC18	zinc finger DHHC-type containing 18 [Source:VGNC Symbol;Acc:VGNC:37133]				-1.07178	1	93.2838	96.1061	79.8955	47.5979	49.642	76.8853	74.9364	45.9907	46.6831	77.5653
ENSBTAG00000017038	HPS4	HPS4 biogenesis of lysosomal organelles complex 3 subunit 2 [Source:VGNC Symbol;Acc:VGNC:29945]				-1.0549	1	30.2102	30.0234	19.2228	12.8585	15.9308	13.3689	18.2464	12.348	14.7406	14.8354
ENSBTAG00000007338	TYROBP	TYRO protein tyrosine kinase binding protein [Source:VGNC Symbol;Acc:VGNC:36552]				-1.05415	1	992.674	1069.79	972.971	609.535	629.092	647.273	647.667	507.294	533.075	670.306
ENSBTAG00000003276	PRKCH	protein kinase C eta [Source:VGNC Symbol;Acc:VGNC:33332]				-1.04847	1	46.5554	60.629	48.7536	27.729	30.0072	28.6859	33.2041	26.7471	27.4357	40.98
ENSBTAG00000010370	CLBA1	clathrin binding box of aftiphilin containing 1 [Source:VGNC Symbol;Acc:VGNC:53934]				-1.04074	1	2.19835	2.94519	2.46553	1.54603	1.65537	1.86461	1.85596	1.27433	1.37174	1.6906
ENSBTAG00000020214	LRRC8B	leucine rich repeat containing 8 VRAC subunit B [Source:VGNC Symbol;Acc:VGNC:31030]				-1.03328	1	50.9627	63.375	58.9572	33.0583	29.2226	43.5328	39.2598	27.8323	33.4508	53.3865
ENSBTAG00000039466	CDR2L	cerebellar degeneration related protein 2 like [Source:VGNC Symbol;Acc:VGNC:27154]				-1.02309	1	19.8819	26.5177	17.0678	11.9479	11.0986	22.5119	16.3909	12.5213	9.60829	14.7934
ENSBTAG00000007374	LHFPL2	LHFPL tetraspan subfamily member 2 [Source:VGNC Symbol;Acc:VGNC:30865]				-1.01465	1	81.2781	72.1556	80.6312	39.3955	43.2894	37.5822	40.569	40.0782	43.465	59.6813
ENSBTAG00000008573	ZFP36	ZFP36 ring finger protein [Source:VGNC Symbol;Acc:VGNC:37162]				-1.01464	1	61.1845	68.6963	47.0807	36.5494	35.1911	50.0566	52.5113	34.0836	28.1597	36.8625
ENSBTAG00000016595	CYSTM1	cysteine rich transmembrane module containing 1 [Source:VGNC Symbol;Acc:VGNC:50308]				-1.0072	1	358.877	404.507	319.835	202.201	234.657	279.612	340.618	188.367	200.545	294.996
ENSBTAG00000002624	PSTPIP2	proline-serine-threonine phosphatase interacting protein 2 [Source:VGNC Symbol;Acc:VGNC:33487]				1.00395	1	29.4407	16.8548	18.7082	39.9067	43.9573	26.0372	31.4407	47.125	44.2469	23.3707
ENSBTAG00000010563	PTPN2	protein tyrosine phosphatase non-receptor type 2 [Source:VGNC Symbol;Acc:VGNC:33534]				1.00994	1	18.0714	24.0466	18.887	35.2051	39.0744	38.3232	43.5798	42.4223	44.6806	27.9456
ENSBTAG00000015874	CASP3	caspase 3 [Source:VGNC Symbol;Acc:VGNC:26781]				1.01042	1	28.2617	20.2872	19.3634	45.9297	42.5329	28.8879	36.6092	50.7903	46.6873	27.6057
ENSBTAG00000024381	MAN1A1	mannosidase alpha class 1A member 1 [Source:VGNC Symbol;Acc:VGNC:31161]				1.02944	1	71.0158	50.005	58.201	128.224	120.378	81.6071	85.8946	134.897	126.533	57.8122
ENSBTAG00000007494	SMARCA2	SWI/SNF related, matrix associated, actin dependent regulator of chromatin, subfamily a, member 2 [Source:VGNC Symbol;Acc:VGNC:34986]				1.03385	1	7.12469	9.50043	5.7159	11.69	14.4733	5.62172	5.3439	17.1314	15.3885	4.84044
ENSBTAG00000020685	0	0				1.05362	1	42.8498	35.6334	33.2436	60.1911	51.4223	61.1713	76.1922	72.7234	96.7052	81.5554
ENSBTAG00000039823	KBTBD7	kelch repeat and BTB domain containing 7 [Source:VGNC Symbol;Acc:VGNC:53820]				1.06058	1	1.64642	1.14443	1.128	2.61761	2.52549	1.45613	1.35406	2.98099	2.86175	1.45082
ENSBTAG00000021968	MID2	midline 2 [Source:NCBI gene;Acc:616821]				1.07586	1	3.85363	2.46441	3.41176	6.25856	5.88638	5.32066	3.41461	7.82313	6.75705	4.45106
ENSBTAG00000009874	ZXDC	ZXD family zinc finger C [Source:VGNC Symbol;Acc:VGNC:37392]				1.07591	1	2.4695	1.89472	2.2614	4.63335	4.49195	4.72126	5.26921	5.02188	5.00129	3.42741
ENSBTAG00000020451	USP1	ubiquitin specific peptidase 1 [Source:VGNC Symbol;Acc:VGNC:36709]				1.11007	1	23.9105	18.6953	19.6079	45.4416	39.7893	40.1959	35.2971	54.6709	42.1095	37.2098
ENSBTAG00000018517	VLDLR	very low density lipoprotein receptor [Source:VGNC Symbol;Acc:VGNC:36803]				1.21506	1	7.56913	7.73633	9.72011	15.6349	19.2126	17.0446	23.7435	23.8109	18.3401	13.3464
ENSBTAG00000020752	CEP78	centrosomal protein 78 [Source:VGNC Symbol;Acc:VGNC:27214]				1.25554	1	19.4849	12.8698	8.57874	24.2764	29.4969	25.97	31.3584	34.7999	32.1758	21.7104
ENSBTAG00000014230	VRK1	VRK serine/threonine kinase 1 [Source:VGNC Symbol;Acc:VGNC:36834]				1.2818	1	5.8427	4.31611	7.01526	15.3418	10.3914	11.3112	7.77721	14.9481	14.4482	12.5903
ENSBTAG00000011597	PDS5B	PDS5 cohesin associated factor B [Source:VGNC Symbol;Acc:VGNC:32718]				1.31067	1	0.863165	1.80109	1.40836	2.56859	2.51787	2.39607	2.13355	3.73978	3.21839	2.35848
ENSBTAG00000039980	CLECL1	C-type lectin like 1 [Source:NCBI gene;Acc:618591]				1.37876	1	57.0541	26.5524	54.9446	110.864	88.2644	79.6981	93.7542	136.595	108.439	70.8506
ENSBTAG00000031178	SLC9A9	solute carrier family 9 member A9 [Source:VGNC Symbol;Acc:VGNC:34947]				1.39335	1	39.5301	16.2777	28.6337	68.35	73.5612	25.8525	27.9624	73.9759	76.5438	18.5021
ENSBTAG00000018383	ATAD5	ATPase family AAA domain containing 5 [Source:VGNC Symbol;Acc:VGNC:26235]				1.40661	1	2.46793	1.61819	2.83963	6.98822	5.26045	3.39056	2.12796	7.35338	5.52226	4.50506
ENSBTAG00000001513	PDIK1L	PDLIM1 interacting kinase 1 like [Source:VGNC Symbol;Acc:VGNC:32701]				1.45728	1	1.19343	0.910103	0.698532	1.98695	1.36278	2.23274	2.08323	2.42029	3.14732	2.52373
ENSBTAG00000023283	JAML	junction adhesion molecule like [Source:VGNC Symbol;Acc:VGNC:30370]				1.53	1	25.8555	14.35	10.8798	44.5912	40.5731	38.9431	40.9271	49.2276	49.8799	21.9914
ENSBTAG00000012068	BRIP1	BRCA1 interacting protein C-terminal helicase 1 [Source:VGNC Symbol;Acc:VGNC:50067]				1.63795	1	1.73563	0.719177	1.59266	4.17216	3.49236	3.22849	2.47428	4.92675	3.58918	4.18984
ENSBTAG00000009924	MR1	major histocompatibility complex, class I-related [Source:VGNC Symbol;Acc:VGNC:31595]				1.71791	1	2.16437	2.25648	1.83494	4.30048	4.7097	4.42748	3.76934	6.26917	8.85311	2.79482
ENSBTAG00000017021	MCM4	minichromosome maintenance complex component 4 [Source:NCBI gene;Acc:504367]				1.85761	1	0.932592	0.724286	0.66212	3.66139	1.68213	2.21187	1.48731	3.35675	2.67056	0.987183
ENSBTAG00000016406	MCM10	minichromosome maintenance 10 replication initiation factor [Source:VGNC Symbol;Acc:VGNC:31307]				1.85901	1	2.88604	1.57972	4.99975	8.13725	8.85287	7.72748	3.66454	12.0211	9.95532	5.4737
ENSBTAG00000008996	SFI1	SFI1 centrin binding protein [Source:VGNC Symbol;Acc:VGNC:34514]				2.11414	1	1.22859	1.06919	0.39771	2.27024	2.63632	1.71938	2.2971	3.09541	4.7873	1.53705
ENSBTAG00000024107	INPP5B	inositol polyphosphate-5-phosphatase B [Source:VGNC Symbol;Acc:VGNC:30211]				2.18484	1	2.16599	1.37279	1.1217	3.21265	3.73175	2.65452	3.42652	6.78195	8.01624	2.38434
ENSBTAG00000014380	MCM2	minichromosome maintenance complex component 2 [Source:VGNC Symbol;Acc:VGNC:31308]				2.47655	1	0.220263	0.0595891	0.245899	0.598453	1.0665	0.348994	0.386642	0.94771	0.854487	0.237121
ENSBTAG00000001476	0	0				3.04094	1	0.293346	0.329911	0.0820371	1.09501	1.88536	0.247636	0.648088	1.54285	2.37401	0.204705
ENSBTAG00000019437	0	schlafen family member 11 [Source:NCBI gene;Acc:521795]				3.323	1	0.146332	0.0348962	0.026074	0.706956	0.364549	0.0992572	0.0497846	0.712906	0.512936	0.0269758
ENSBTAG00000003508	CFAP69	cilia and flagella associated protein 69 [Source:VGNC Symbol;Acc:VGNC:27249]				4.39059	1	0	0.0103399	0	0	0	0	0	0.18928	0.144734	0
ENSBTAG00000017275	COIL	coilin [Source:VGNC Symbol;Acc:VGNC:27552]				4.41469	1	0	0	0	0	0	0	0	0.138987	0.0561829	0
ENSBTAG00000001939	SECISBP2	SECIS binding protein 2 [Source:VGNC Symbol;Acc:VGNC:34419]				4.6056	1	0	0	0	0	0	0	0	0.133746	0.0958512	0
ENSBTAG00000021224	ZSWIM6	zinc finger SWIM-type containing 6 [Source:VGNC Symbol;Acc:VGNC:37386]				4.89466	1	0	0	0	0	0	0	0	0.088812	0.0935912	0
ENSBTAG00000010027	CHDH	choline dehydrogenase [Source:VGNC Symbol;Acc:VGNC:27285]				5.02379	1	0	0	0	0	0	0.028005	0.0189234	0.0873855	0.106864	0.0274648
ENSBTAG00000027409	SLC4A11	solute carrier family 4 member 11 [Source:VGNC Symbol;Acc:VGNC:34891]				5.1351	1	0	0	0	0	0	0	0	0.141407	0.0622962	0
ENSBTAG00000002796	KLHL3	kelch like family member 3 [Source:VGNC Symbol;Acc:VGNC:30657]				5.21117	1	0	0	0	0	0	0	0	0.180574	0.130275	0
ENSBTAG00000017379	GCN1	GCN1 activator of EIF2AK4 [Source:VGNC Symbol;Acc:VGNC:29292]				5.51344	1	0	0	0	0	0	0	0	0.0713466	0.0374493	0
ENSBTAG00000009736	CDC42BPG	CDC42 binding protein kinase gamma [Source:VGNC Symbol;Acc:VGNC:27071]				5.57492	1	0	0	0.000104328	0.0225479	0	0	0	0.0992535	0.0422479	0
ENSBTAG00000018227	SLC4A7	solute carrier family 4 member 7 [Source:VGNC Symbol;Acc:VGNC:34896]				5.589	1	0	0	0	0.254618	0.216825	0	0.145953	0.389448	0.627915	0.060488
ENSBTAG00000025211	ING1	inhibitor of growth family member 1 [Source:VGNC Symbol;Acc:VGNC:30194]				5.79789	1	0	0	0	0	0.145739	0.0580654	0.0580244	0.349137	0.472753	0.173284
ENSBTAG00000047274	KIF21B	kinesin family member 21B [Source:VGNC Symbol;Acc:VGNC:59343]				5.93888	1	0	0	0	0	0	0	0.05739	0.128083	0.0998638	0
ENSBTAG00000000902	OGT	O-linked N-acetylglucosamine (GlcNAc) transferase [Source:NCBI gene;Acc:532053]				6.30239	1	0	0	0	0	0	0	0	0.340949	0.136763	0
ENSBTAG00000038981	0	adhesion G protein-coupled receptor E4 [Source:NCBI gene;Acc:518134]				6.33962	1	0	0	0.229362	0.800631	0.898459	0.790161	0.975494	1.82726	1.67961	0.281159
ENSBTAG00000030348	ZNF582	zinc finger protein 582 [Source:NCBI gene;Acc:790311]				7.47926	1	0	0	0	0	0	0.644466	0	2.01665	1.19979	0
ENSBTAG00000010345	XPNPEP2	X-prolyl aminopeptidase 2 [Source:VGNC Symbol;Acc:VGNC:36995]			-5.36162	#N/A	1	0.876567	1.14564	1.13652	0.1562	0.00327028	2.26208	1.84871	0.718831	0.619052	1.72467
ENSBTAG00000011271	SNX31	sorting nexin 31 [Source:VGNC Symbol;Acc:VGNC:35109]			-3.79104	#N/A	1	0.403093	0.602039	0.450074	0.0401677	0.0184388	0.283581	0.276953	0.055003	0.0200273	0.40459
ENSBTAG00000021713	MAMLD1	mastermind like domain containing 1 [Source:VGNC Symbol;Acc:VGNC:56928]			-3.42075	#N/A	1	3.45546	8.06465	6.9724	0.631276	0.511338	3.14664	2.85011	1.49614	0.736558	5.70986
ENSBTAG00000040607	SLA2	Src like adaptor 2 [Source:VGNC Symbol;Acc:VGNC:34651]			-2.68961	#N/A	1	7.90974	14.7979	6.41944	1.44929	1.51531	21.3715	16.2584	3.67459	2.35821	11.0243
ENSBTAG00000004557	DHRS9	dehydrogenase/reductase 9 [Source:VGNC Symbol;Acc:VGNC:28046]			-2.52174	#N/A	1	10.1036	4.98554	10.8405	1.23883	1.78005	15.6337	18.6185	2.38471	2.09549	22.1702
ENSBTAG00000005668	SLC39A8	solute carrier family 39 member 8 [Source:VGNC Symbol;Acc:VGNC:34868]			-2.46285	#N/A	1	11.1848	28.6639	23.8914	3.04156	4.59721	30.6495	45.6865	5.13843	7.1249	39.2145
ENSBTAG00000009421	CD1E	CD1e molecule [Source:VGNC Symbol;Acc:VGNC:27008]			-2.43371	#N/A	1	108.409	68.9221	181.549	22.3482	20.8631	516.518	263.254	155.657	86.9434	217.928
ENSBTAG00000052744	0	chromosome 18 C16orf74 homolog [Source:NCBI gene;Acc:613483]			-2.41763	#N/A	1	2.58684	2.93369	4.65474	0.742007	0.552297	2.9401	1.81822	1.15119	0.696667	3.24824
ENSBTAG00000019533	ADTRP	androgen dependent TFPI regulating protein [Source:VGNC Symbol;Acc:VGNC:25702]			-2.30125	#N/A	1	6.82143	6.76474	4.07616	1.1859	1.2603	8.02061	7.65683	3.86051	2.67217	4.48189
ENSBTAG00000010663	ADAM15	ADAM metallopeptidase domain 15 [Source:VGNC Symbol;Acc:VGNC:25606]			-2.15901	#N/A	1	10.5447	7.0789	8.3044	3.34826	1.21154	10.4501	10.0668	5.59282	4.83794	5.8562
ENSBTAG00000006276	C1QTNF1	C1q and TNF related 1 [Source:VGNC Symbol;Acc:VGNC:26622]			-2.116	#N/A	1	3.09251	2.76595	2.37409	0.574521	0.733025	1.74929	1.86132	0.941423	1.49666	1.41917
ENSBTAG00000013222	CD109	CD109 molecule [Source:VGNC Symbol;Acc:VGNC:27002]			-2.05209	#N/A	1	32.0601	17.268	17.689	8.25409	3.6361	22.2505	15.5417	11.0988	5.50804	22.1307
ENSBTAG00000014501	FERMT2	fermitin family member 2 [Source:VGNC Symbol;Acc:VGNC:28953]			-2.02586	#N/A	1	7.09211	7.65108	9.7922	2.94043	1.51398	11.3881	8.59579	4.83705	2.01885	11.0248
ENSBTAG00000015980	FASN	fatty acid synthase [Source:VGNC Symbol;Acc:VGNC:28871]			-1.92278	#N/A	1	10.1051	22.5406	16.4081	3.74911	4.93679	27.8463	17.6652	7.63633	7.0858	38.9962
ENSBTAG00000010158	NOS1AP	nitric oxide synthase 1 adaptor protein [Source:VGNC Symbol;Acc:VGNC:55636]			-1.90775	#N/A	1	5.91023	4.2497	5.4071	1.28671	1.56917	5.32188	4.81934	2.74929	1.9604	6.89399
ENSBTAG00000014855	MICAL2	microtubule associated monooxygenase, calponin and LIM domain containing 2 [Source:VGNC Symbol;Acc:VGNC:31458]			-1.88817	#N/A	1	5.74997	11.6192	8.5516	2.25737	2.46721	6.06612	3.87198	3.08954	2.23945	7.57619
ENSBTAG00000001586	OTUD7B	OTU deubiquitinase 7B [Source:VGNC Symbol;Acc:VGNC:32500]			-1.84149	#N/A	1	2.12401	3.74359	2.45099	0.695979	0.88341	3.46609	3.49282	1.21608	1.09551	2.33785
ENSBTAG00000049619	GFOD1	glucose-fructose oxidoreductase domain containing 1 [Source:NCBI gene;Acc:104968712]			-1.75849	#N/A	1	3.25257	2.26101	2.71987	0.698178	1.00707	2.78757	2.54245	1.56076	1.45936	3.18898
ENSBTAG00000005370	TMTC1	transmembrane O-mannosyltransferase targeting cadherins 1 [Source:VGNC Symbol;Acc:VGNC:36146]			-1.74675	#N/A	1	2.16658	1.53896	1.20332	0.530322	0.469053	2.25693	1.43474	0.97922	0.627316	1.98561
ENSBTAG00000006071	CTTN	cortactin [Source:VGNC Symbol;Acc:VGNC:27821]			-1.61239	#N/A	1	11.6798	11.2514	16.1182	5.28482	3.66861	19.0174	15.8498	7.28017	4.42721	20.506
ENSBTAG00000015604	ZNF385A	zinc finger protein 385A [Source:VGNC Symbol;Acc:VGNC:37263]			-1.57764	#N/A	1	5.17379	5.80924	4.93311	1.78355	1.89783	8.19244	6.79821	4.10608	3.0595	6.68781
ENSBTAG00000006528	BBS9	Bardet-Biedl syndrome 9 [Source:NCBI gene;Acc:535387]			-1.56509	#N/A	1	10.1082	10.0791	16.8735	4.13468	4.40137	13.5271	11.5084	8.07884	6.74843	15.661
ENSBTAG00000015293	NXPH3	neurexophilin 3 [Source:VGNC Symbol;Acc:VGNC:32382]			-1.53885	#N/A	1	9.16205	12.778	13.2003	3.39305	5.02974	14.7349	14.5488	6.40866	6.82739	17.5764
ENSBTAG00000013125	PLAUR	plasminogen activator, urokinase receptor [Source:VGNC Symbol;Acc:VGNC:32976]			-1.51432	#N/A	1	177.084	371.809	244.001	86.4279	100.348	436.051	465.459	135.744	130.836	301.081
ENSBTAG00000006614	TMCC1	transmembrane and coiled-coil domain family 1 [Source:VGNC Symbol;Acc:VGNC:35925]			-1.5075	#N/A	1	3.22135	4.41022	3.57566	1.22623	1.51156	2.97754	4.38733	1.74944	2.03775	3.71296
ENSBTAG00000051104	CGREF1	cell growth regulator with EF-hand domain 1 [Source:NCBI gene;Acc:507586]			-1.49632	#N/A	1	9.53159	10.6109	14.0847	4.13958	4.18827	17.1657	14.3148	5.54512	5.91802	11.4254
ENSBTAG00000009863	BHLHE40	basic helix-loop-helix family member e40 [Source:VGNC Symbol;Acc:VGNC:26486]			-1.47769	#N/A	1	51.7703	86.5262	52.0525	19.0973	28.0985	111.631	121.576	45.1617	41.5394	104.67
ENSBTAG00000009975	PBX4	PBX homeobox 4 [Source:VGNC Symbol;Acc:VGNC:32610]			-1.43195	#N/A	1	8.55645	9.97858	9.46177	4.30345	3.05972	15.5185	12.0472	5.87177	5.10848	14.4105
ENSBTAG00000013341	GYG2	glycogenin 2 [Source:VGNC Symbol;Acc:VGNC:29729]			-1.41324	#N/A	1	7.68933	6.59254	10.8578	3.06845	3.3372	14.3862	13.3228	4.7564	4.03223	12.308
ENSBTAG00000018596	PTPN21	protein tyrosine phosphatase non-receptor type 21 [Source:VGNC Symbol;Acc:VGNC:33535]			-1.3551	#N/A	1	5.51513	4.97704	4.06211	2.12754	1.83599	5.06693	4.60967	2.94721	2.26802	3.68708
ENSBTAG00000047591	C23H6orf141	chromosome 23 C6orf141 homolog [Source:VGNC Symbol;Acc:VGNC:52676]			-1.33612	#N/A	1	16.3302	25.6068	17.2117	7.26017	8.75961	15.3166	20.7114	9.79329	9.71444	16.0252
ENSBTAG00000000859	SLC38A1	solute carrier family 38 member 1 [Source:VGNC Symbol;Acc:VGNC:34846]			-1.32347	#N/A	1	47.6786	71.8928	64.9656	27.5916	24.0759	114.553	122.17	48.2413	40.0096	108.756
ENSBTAG00000023929	FOSL2	FOS like 2, AP-1 transcription factor subunit [Source:VGNC Symbol;Acc:VGNC:29076]			-1.29753	#N/A	1	32.4183	65.8998	42.7201	17.1075	21.5175	69.4463	70.999	21.4838	23.1677	63.5473
ENSBTAG00000003607	FAM20C	FAM20C golgi associated secretory pathway kinase [Source:VGNC Symbol;Acc:VGNC:28787]			-1.28106	#N/A	1	65.028	92.3582	86.6338	27.313	44.1085	68.2254	74.6604	37.9642	46.2347	67.0984
ENSBTAG00000015426	PDLIM4	PDZ and LIM domain 4 [Source:VGNC Symbol;Acc:VGNC:32710]			-1.25635	#N/A	1	32.0468	50.4702	39.097	20.6884	15.0133	69.5106	50.4085	23.0104	15.5154	42.8138
ENSBTAG00000005976	HSD17B7	hydroxysteroid 17-beta dehydrogenase 7 [Source:VGNC Symbol;Acc:VGNC:29976]			-1.25207	#N/A	1	21.6456	36.9618	31.5713	11.8946	14.3178	30.5484	30.6453	14.8382	15.1109	41.0494
ENSBTAG00000011684	RAB11FIP1	RAB11 family interacting protein 1 [Source:VGNC Symbol;Acc:VGNC:33616]			-1.23921	#N/A	1	7.661	12.827	11.8249	4.75764	4.56994	12.9854	11.6672	7.16146	6.46258	10.0494
ENSBTAG00000007814	WWTR1	WW domain containing transcription regulator 1 [Source:VGNC Symbol;Acc:VGNC:36980]			-1.23773	#N/A	1	3.90634	4.70927	4.0494	2.27946	1.55401	5.07889	4.52774	3.02927	2.35434	4.70067
ENSBTAG00000046545	MEF2D	myocyte enhancer factor 2D [Source:VGNC Symbol;Acc:VGNC:31374]			-1.19956	#N/A	1	8.35486	9.61312	6.84158	3.81097	3.66557	7.72709	5.26215	5.18205	5.15141	6.64956
ENSBTAG00000038283	TMEM243	transmembrane protein 243 [Source:VGNC Symbol;Acc:VGNC:36054]			-1.18959	#N/A	1	13.4817	15.701	14.9198	7.93946	5.75619	18.1114	13.6196	12.4214	7.98062	11.2265
ENSBTAG00000020172	DENND2D	DENN domain containing 2D [Source:VGNC Symbol;Acc:VGNC:27997]			-1.18916	#N/A	1	24.546	22.2399	23.1091	10.2529	11.2738	19.2626	18.4607	13.7419	12.4662	21.9403
ENSBTAG00000011209	SYT11	synaptotagmin 11 [Source:VGNC Symbol;Acc:VGNC:35537]			-1.18648	#N/A	1	2.98123	3.63225	3.04037	1.3942	1.58333	3.95883	3.70498	1.72248	2.07158	4.33111
ENSBTAG00000019734	CD276	CD276 molecule [Source:VGNC Symbol;Acc:VGNC:27020]			-1.17056	#N/A	1	12.997	18.9424	14.9667	5.90396	8.79291	15.9384	18.5979	8.35372	9.70757	13.4773
ENSBTAG00000014979	MFSD12	major facilitator superfamily domain containing 12 [Source:VGNC Symbol;Acc:VGNC:58388]			-1.16464	#N/A	1	144.438	201.087	178.204	81.7107	81.0712	248.198	215.45	104.756	85.965	167.644
ENSBTAG00000004150	NRG1	neuregulin 1 [Source:VGNC Symbol;Acc:VGNC:32261]			-1.1477	#N/A	1	3.4871	2.74328	3.63083	1.70112	1.40428	6.45356	6.7979	1.52023	2.06477	6.88902
ENSBTAG00000009351	ATXN10	ataxin 10 [Source:VGNC Symbol;Acc:VGNC:26338]			-1.14261	#N/A	1	196.265	237.217	261.631	110.238	109.799	169.573	199.038	128.633	124.404	214.911
ENSBTAG00000032914	SLC11A2	solute carrier family 11 member 2 [Source:NCBI gene;Acc:521189]			-1.12819	#N/A	1	24.7573	41.9096	37.4803	17.1607	15.7075	38.7346	47.293	21.2706	18.2591	44.8675
ENSBTAG00000007066	TMTC4	transmembrane O-mannosyltransferase targeting cadherins 4 [Source:VGNC Symbol;Acc:VGNC:36148]			-1.12102	#N/A	1	13.9411	12.9708	13.6864	6.81108	6.34295	19.8929	16.6128	8.32488	7.8129	13.363
ENSBTAG00000046052	ANKRD63	ankyrin repeat domain 63 [Source:VGNC Symbol;Acc:VGNC:25940]			-1.12037	#N/A	1	6.44414	8.08482	7.71397	3.29221	3.79605	5.89813	4.82121	3.72811	4.64334	4.49949
ENSBTAG00000034220	0	cyclin-dependent kinase inhibitor 2A [Source:NCBI gene;Acc:616369]			-1.08721	#N/A	1	34.5404	30.6527	21.7539	14.4148	13.6546	37.7807	29.0885	24.0422	14.0528	26.1013
ENSBTAG00000011397	UNC13B	unc-13 homolog B [Source:VGNC Symbol;Acc:VGNC:56987]			-1.07974	#N/A	1	5.32683	7.05383	7.02222	3.28504	3.11254	7.4336	8.13765	3.58531	3.65062	7.12441
ENSBTAG00000014178	RALGAPA2	Ral GTPase activating protein catalytic alpha subunit 2 [Source:VGNC Symbol;Acc:VGNC:33702]			-1.07586	#N/A	1	11.8753	9.39234	11.5423	5.06182	5.81436	10.2993	9.89336	6.50253	6.81318	11.0922
ENSBTAG00000053581	SUCNR1	succinate receptor 1 [Source:NCBI gene;Acc:539622]			-1.06739	#N/A	1	33.5925	41.9772	27.631	20.6091	14.2524	35.6762	30.0643	27.5965	17.7585	28.396
ENSBTAG00000016093	PLP2	proteolipid protein 2 [Source:VGNC Symbol;Acc:VGNC:56949]			-1.0602	#N/A	1	395.882	327.127	335.777	172.966	180.033	382.362	420.008	215.795	222.038	351.288
ENSBTAG00000006156	BST1	bone marrow stromal cell antigen 1 [Source:VGNC Symbol;Acc:VGNC:26581]			-1.05918	#N/A	1	54.7387	48.5986	46.9001	27.713	23.1366	89.371	58.1203	33.2808	29.6456	72.4836
ENSBTAG00000003359	ELOVL5	ELOVL fatty acid elongase 5 [Source:VGNC Symbol;Acc:VGNC:28451]			-1.04128	#N/A	1	114.459	115.859	107.821	58.0882	57.7044	181.651	185	79.8176	77.6874	149.825
ENSBTAG00000027991	ANAPC1	anaphase promoting complex subunit 1 [Source:VGNC Symbol;Acc:VGNC:25879]			-1.03546	#N/A	1	7.35924	5.42714	7.54082	4.2324	2.82455	7.8588	6.0493	6.17318	4.99337	6.2932
ENSBTAG00000001156	ST3GAL1	ST3 beta-galactoside alpha-2,3-sialyltransferase 1 [Source:VGNC Symbol;Acc:VGNC:35331]			-1.02538	#N/A	1	34.2161	53.9098	45.8274	21.5986	23.6493	45.6742	49.0049	25.3833	26.379	48.5082
ENSBTAG00000013555	ACVR1B	activin A receptor type 1B [Source:VGNC Symbol;Acc:VGNC:25593]			-1.02179	#N/A	1	15.1503	21.195	20.7517	9.23854	10.2162	29.7465	26.6891	13.8819	12.8775	30.483
ENSBTAG00000003636	LIPA	lipase A, lysosomal acid type [Source:VGNC Symbol;Acc:VGNC:30904]			-1.00944	#N/A	1	4951.1	5122.09	6036.68	3137.25	2515.27	4590.07	4153.45	3197.05	2667.07	4951.25
ENSBTAG00000000081	CERT1	ceramide transporter 1 [Source:VGNC Symbol;Acc:VGNC:27566]			-1.00652	#N/A	1	20.5388	20.1365	19.6879	11.4658	9.73824	18.064	18.415	11.4532	13.9334	22.4881
ENSBTAG00000012361	ARHGEF11	Rho guanine nucleotide exchange factor 11 [Source:VGNC Symbol;Acc:VGNC:54878]			-1.00597	#N/A	1	20.997	18.7279	18.0594	9.30891	10.7616	17.1981	16.0186	11.3675	11.5988	17.3948
ENSBTAG00000017779	HSD17B10	hydroxysteroid 17-beta dehydrogenase 10 [Source:VGNC Symbol;Acc:VGNC:29969]			1.01336	#N/A	1	26.0229	26.1358	33.6787	61.9941	58.5179	39.2765	41.097	55.4263	57.8058	35.4999
ENSBTAG00000014249	IVNS1ABP	influenza virus NS1A binding protein [Source:NCBI gene;Acc:514940]			1.01549	#N/A	1	40.3471	40.8575	32.8952	79.3966	83.2345	41.6218	40.2569	77.9049	70.2048	36.6349
ENSBTAG00000011953	PRKACB	protein kinase cAMP-activated catalytic subunit beta [Source:VGNC Symbol;Acc:VGNC:33321]			1.02642	#N/A	1	36.4558	23.4444	32.039	70.5581	60.3624	30.8565	27.6851	65.3769	57.6638	27.253
ENSBTAG00000000015	FOXRED2	FAD dependent oxidoreductase domain containing 2 [Source:VGNC Symbol;Acc:VGNC:29107]			1.03993	#N/A	1	14.8388	8.47642	12.4075	25.2156	24.8266	10.7449	9.55525	23.5367	24.7881	11.084
ENSBTAG00000007755	APOBEC3H	apolipoprotein B mRNA editing enzyme catalytic subunit 3H [Source:NCBI gene;Acc:108771180]			1.04645	#N/A	1	5.52747	3.50275	4.0531	9.30333	9.30855	5.18015	5.09591	8.17527	9.36106	4.16953
ENSBTAG00000006572	CARD9	caspase recruitment domain family member 9 [Source:VGNC Symbol;Acc:VGNC:26764]			1.05138	#N/A	1	89.7566	60.4951	49.3604	144.156	137.646	56.1644	52.2843	135.286	113.653	43.8782
ENSBTAG00000021452	TRANK1	tetratricopeptide repeat and ankyrin repeat containing 1 [Source:VGNC Symbol;Acc:VGNC:36282]			1.05244	#N/A	1	2.2511	2.34277	2.34808	6.16731	4.14039	2.02394	2.54682	5.01904	4.75615	2.37439
ENSBTAG00000020144	GPR34	G protein-coupled receptor 34 [Source:VGNC Symbol;Acc:VGNC:29583]			1.05341	#N/A	1	113.57	92.6861	109.694	208.516	252.612	62.8804	73.9741	191.085	240.761	85.9495
ENSBTAG00000020043	ARHGAP17	Rho GTPase activating protein 17 [Source:VGNC Symbol;Acc:VGNC:26077]			1.05978	#N/A	1	14.3064	8.45119	8.18248	23.2643	20.6375	9.62544	8.33368	21.9706	20.2693	6.85711
ENSBTAG00000022489	0	E3 ubiquitin-protein ligase RNF213 [Source:NCBI gene;Acc:509283]			1.0631	#N/A	1	21.884	28.0426	26.5529	70.6647	44.0085	14.6961	14.3296	55.4116	44.7639	18.4495
ENSBTAG00000010059	C8H9orf72	chromosome 8 C9orf72 homolog [Source:VGNC Symbol;Acc:VGNC:52742]			1.07816	#N/A	1	22.2187	20.5464	16.7654	44.0174	44.059	22.3523	24.5639	45.175	39.9853	19.7366
ENSBTAG00000032369	NMI	N-myc and STAT interactor [Source:VGNC Symbol;Acc:VGNC:56132]			1.08001	#N/A	1	29.8869	20.7491	28.1469	67.535	49.6147	27.2896	27.3912	61.6113	48.0648	31.1182
ENSBTAG00000014432	HNMT	histamine N-methyltransferase [Source:VGNC Symbol;Acc:VGNC:29893]			1.10174	#N/A	1	82.1942	129.994	92.1888	217.029	234.869	172.125	172.521	210.215	220.012	135.517
ENSBTAG00000014297	MOV10	Mov10 RISC complex RNA helicase [Source:VGNC Symbol;Acc:VGNC:31566]			1.11322	#N/A	1	6.23161	6.13081	6.30478	16.28	12.227	6.53979	9.46764	12.0252	10.3117	7.92152
ENSBTAG00000003366	DDX58	DExD/H-box helicase 58 [Source:VGNC Symbol;Acc:VGNC:27979]			1.11934	#N/A	1	24.5201	25.0473	25.3697	78.4152	41.6431	20.3467	19.4347	59.6823	42.8243	25.0417
ENSBTAG00000005814	PSME2	proteasome activator subunit 2 [Source:VGNC Symbol;Acc:VGNC:33474]			1.12233	#N/A	1	116.464	115.038	150.619	317.656	260.176	233.118	211.605	277.32	242.586	192.357
ENSBTAG00000003708	SEC23A	Sec23 homolog A, COPII coat complex component [Source:VGNC Symbol;Acc:VGNC:34410]			1.13535	#N/A	1	25.9862	25.0382	26.1645	64.0048	55.4232	26.4086	26.0452	55.8457	50.0402	28.7146
ENSBTAG00000020319	ALOX5	arachidonate 5-lipoxygenase [Source:VGNC Symbol;Acc:VGNC:25844]			1.13856	#N/A	1	53.5042	29.2278	33.234	84.1708	89.6498	23.895	17.1691	76.0722	80.0425	24.9013
ENSBTAG00000045880	0	sialic acid binding Ig like lectin 5 [Source:NCBI gene;Acc:100300478]			1.20319	#N/A	1	7.08555	5.8801	3.02865	13.997	10.6204	4.37472	3.76054	10.4947	9.39569	2.79254
ENSBTAG00000013926	FCGRT	Fc fragment of IgG receptor and transporter [Source:VGNC Symbol;Acc:VGNC:28934]			1.21319	#N/A	1	2.76092	1.85664	1.55942	4.83815	4.89966	1.89426	1.63538	3.97617	4.43217	1.54723
ENSBTAG00000037527	OAS1Z	2',5'-oligoadenylate synthetase 1, 40/46kDa [Source:NCBI gene;Acc:519922]			1.2194	#N/A	1	18.9002	25.6615	26.624	71.4337	46.6562	13.3073	17.3295	56.2543	50.1946	23.5028
ENSBTAG00000053050	SAMD9	sterile alpha motif domain containing 9 [Source:NCBI gene;Acc:514205]			1.22336	#N/A	1	44.8187	48.296	38.3043	132.515	88.0329	28.4946	30.3641	103.019	78.9622	48.2201
ENSBTAG00000017284	RHBDL1	rhomboid like 1 [Source:VGNC Symbol;Acc:VGNC:33935]			1.2381	#N/A	1	5.81071	5.11052	3.09597	10.9433	11.517	2.9004	2.48072	8.26714	7.58317	3.03197
ENSBTAG00000030932	IFI44L	interferon induced protein 44 like [Source:VGNC Symbol;Acc:VGNC:30046]			1.24052	#N/A	1	28.9571	38.3784	27.5521	91.09	67.2558	18.7608	24.4207	70.0774	63.7612	23.9763
ENSBTAG00000014878	COX7A1	cytochrome c oxidase subunit 7A1 [Source:VGNC Symbol;Acc:VGNC:27639]			1.24907	#N/A	1	13.8215	7.91458	7.60185	24.2277	22.2147	9.79709	11.6484	19.1723	19.6733	5.65571
ENSBTAG00000021395	PSME1	proteasome activator subunit 1 [Source:VGNC Symbol;Acc:VGNC:33473]			1.2504	#N/A	1	120.941	126.537	143.293	356.714	299.844	118.047	120.174	277.764	270.86	134.885
ENSBTAG00000005313	EPHB3	EPH receptor B3 [Source:VGNC Symbol;Acc:VGNC:28539]			1.28489	#N/A	1	2.33692	3.82184	1.7009	5.95406	6.8158	1.27939	1.2605	3.2953	4.51884	1.01783
ENSBTAG00000019107	GAS7	growth arrest specific 7 [Source:VGNC Symbol;Acc:VGNC:29262]			1.32359	#N/A	1	5.84699	5.28638	3.69136	12.0791	13.4811	4.32545	5.15231	7.97478	7.64146	2.69728
ENSBTAG00000012607	NCAPH2	non-SMC condensin II complex subunit H2 [Source:VGNC Symbol;Acc:VGNC:31906]			1.32741	#N/A	1	0.952581	0.790821	0.51931	2.32064	1.62485	1.15821	0.968484	2.17171	1.51797	0.934988
ENSBTAG00000024960	0	antigen-presenting glycoprotein CD1d [Source:NCBI gene;Acc:782367]			1.33677	#N/A	1	5.20401	2.7982	3.68194	8.98024	11.0801	1.12919	2.14669	7.74572	10.0441	1.9314
ENSBTAG00000001468	SAMD4A	sterile alpha motif domain containing 4A [Source:VGNC Symbol;Acc:VGNC:34272]			1.35225	#N/A	1	3.88679	1.68819	1.77478	6.08388	6.13652	1.90799	1.96566	5.03373	5.48473	1.45092
ENSBTAG00000035827	ATG7	autophagy related 7 [Source:VGNC Symbol;Acc:VGNC:26261]			1.38735	#N/A	1	4.44438	2.9135	3.21546	8.85753	10.2813	9.01746	5.54319	6.68721	9.63291	5.70438
ENSBTAG00000007093	0	0			1.4047	#N/A	1	3.59702	1.9054	4.22249	8.65082	8.32346	5.33653	3.7601	8.8833	6.90745	3.8656
ENSBTAG00000024675	CYSLTR1	cysteinyl leukotriene receptor 1 [Source:NCBI gene;Acc:782045]			1.44193	#N/A	1	4.11486	1.86015	3.36809	9.31743	7.82369	3.84871	4.10158	8.13684	6.99249	2.55914
ENSBTAG00000010963	IL16	interleukin 16 [Source:VGNC Symbol;Acc:VGNC:53943]			1.53025	#N/A	1	0.795262	0.738345	0.935596	2.74217	2.25305	0.675646	0.348307	2.68829	1.59936	0.551693
ENSBTAG00000003305	NCF1	neutrophil cytosolic factor 1 [Source:NCBI gene;Acc:281345]			1.54376	#N/A	1	35.8477	17.8325	31.079	83.8789	82.1506	21.1195	25.3617	80.1928	69.4018	40.2069
ENSBTAG00000014698	CARD11	caspase recruitment domain family member 11 [Source:VGNC Symbol;Acc:VGNC:26761]			1.60093	#N/A	1	9.6142	6.83	11.2081	23.2239	35.3557	2.44734	3.99406	20.042	28.4938	5.67544
ENSBTAG00000010937	APOO	apolipoprotein O [Source:VGNC Symbol;Acc:VGNC:26035]			1.60949	#N/A	1	2.15988	1.11729	1.43456	4.73976	5.00074	0.367088	0.496806	3.83641	4.50504	0.976506
ENSBTAG00000020281	NIN	ninein [Source:VGNC Symbol;Acc:VGNC:32077]			1.63769	#N/A	1	2.18451	2.13612	0.748355	5.47616	4.6537	2.72808	1.52547	5.22758	4.90734	1.23703
ENSBTAG00000001292	LTF	lactotransferrin [Source:VGNC Symbol;Acc:VGNC:31077]			1.73454	#N/A	1	0.774271	0.832828	0.518675	3.10608	1.92777	0.738688	0.426539	2.072	1.26747	0.2854
ENSBTAG00000018015	IL27	interleukin 27 [Source:VGNC Symbol;Acc:VGNC:30150]			1.73722	#N/A	1	6.55288	3.97515	2.13288	12.4027	14.3951	5.90402	9.34465	10.0297	10.7481	5.12221
ENSBTAG00000048782	0	0			1.74291	#N/A	1	5458.71	4561.26	2427.53	14120.9	13615.7	5746.83	4849.24	12784.4	12429.3	2444.83
ENSBTAG00000008057	PARVG	parvin gamma [Source:VGNC Symbol;Acc:VGNC:32591]			1.78402	#N/A	1	0.229043	0.164528	0.157385	0.684656	0.642721	0.171004	0.33331	0.221301	0.313767	0.329167
ENSBTAG00000001879	PER2	period circadian regulator 2 [Source:NCBI gene;Acc:512237]			1.80696	#N/A	1	0.43586	0.257967	0.194499	1.17644	0.91937	0.117241	0.0958273	0.4279	0.733056	0.176068
ENSBTAG00000000820	GNG11	G protein subunit gamma 11 [Source:VGNC Symbol;Acc:VGNC:53646]			1.82335	#N/A	1	11.329	4.417	5.24165	24.347	23.0384	1.69204	2.12635	16.5116	18.7169	3.21292
ENSBTAG00000054469	SLC25A53	solute carrier family 25 member 53 [Source:NCBI gene;Acc:786529]			1.84941	#N/A	1	0.644376	0.227772	0.448802	1.91766	1.24288	0.451069	0.464172	1.76068	1.15044	0.401956
ENSBTAG00000014762	ISG20	interferon stimulated exonuclease gene 20 [Source:VGNC Symbol;Acc:VGNC:30294]			1.9176	#N/A	1	0.281501	0.26633	0.303372	1.4188	0.931287	0.362471	0.461232	0.810851	0.543284	0.280588
ENSBTAG00000021469	CTTNBP2	cortactin binding protein 2 [Source:VGNC Symbol;Acc:VGNC:27822]			2.00477	#N/A	1	4.10269	1.44232	1.53666	7.99935	9.83193	2.87546	2.21031	7.38356	6.41045	1.35465
ENSBTAG00000005182	BoLA	Bos taurus major histocompatibility complex, class I, A (BOLA-A), mRNA. [Source:RefSeq mRNA;Acc:NM_001040554]			2.07009	#N/A	1	85.9161	72.7822	29.9035	201.612	318.338	59.7712	68.3175	184.648	272.092	29.8172
ENSBTAG00000009703	MYH7	myosin heavy chain 7 [Source:NCBI gene;Acc:282714]			2.14102	#N/A	1	2.26698	0.684953	2.38366	8.09346	6.26264	0.726111	0.216462	6.30502	5.2289	0.973928
ENSBTAG00000018119	AOAH	acyloxyacyl hydrolase [Source:VGNC Symbol;Acc:VGNC:25971]			2.17811	#N/A	1	46.1401	11.2414	23.5856	128.15	94.339	14.1412	7.67222	117.311	91.7116	17.061
ENSBTAG00000004330	ENO4	enolase 4 [Source:VGNC Symbol;Acc:VGNC:28499]			2.23515	#N/A	1	0.671694	0.429093	0.574464	3.4377	2.2147	0.366809	0.258286	1.96378	1.57324	0.754167
ENSBTAG00000011193	C1QC	complement C1q C chain [Source:VGNC Symbol;Acc:VGNC:26619]			2.44872	#N/A	1	395.475	85.5067	90.9605	889.789	775.002	117.469	140.672	790.545	703.217	69.7093
ENSBTAG00000014172	FGD2	FYVE, RhoGEF and PH domain containing 2 [Source:VGNC Symbol;Acc:VGNC:28965]			2.48492	#N/A	1	8.93923	1.2885	2.73999	23.771	14.5026	0.831137	0.752273	20.2503	14.4356	1.02156
ENSBTAG00000048353	0	0			2.51973	#N/A	1	0.567094	0.14441	0.429722	1.56498	2.51757	0.134825	0.420027	1.363	1.49867	0.171148
ENSBTAG00000011196	C1QB	complement C1q B chain [Source:VGNC Symbol;Acc:VGNC:26617]			2.72041	#N/A	1	353.689	57.0066	76.4225	833.973	764.527	105.946	139.231	728.879	773.95	61.5124
ENSBTAG00000024426	PPP1R9A	protein phosphatase 1 regulatory subunit 9A [Source:VGNC Symbol;Acc:VGNC:33250]			2.85935	#N/A	1	0.684769	0.215888	0.292267	3.83502	1.91627	0.963017	0.294057	3.92051	1.75998	0.716445
ENSBTAG00000002069	BOLA	MHC class I heavy chain [Source:NCBI gene;Acc:515712]			3.0329	#N/A	1	1096.9	410.096	171.58	3716.3	3657.87	720.524	427.552	3337.62	3186.2	184.506
ENSBTAG00000052878	0	0			3.1315	#N/A	1	7.34583	11.3118	1.10018	41.0455	45.1506	7.9826	12.549	38.2385	39.2595	2.71239
ENSBTAG00000007955	SEZ6L2	seizure related 6 homolog like 2 [Source:VGNC Symbol;Acc:VGNC:34504]			3.1672	#N/A	1	0.0126267	0.0304225	0.0120369	0.226537	0.153419	0.00766209	0	0.107117	0.136511	0
ENSBTAG00000026088	LYZ2	lysozyme C-2 [Source:NCBI gene;Acc:280849]			3.19386	#N/A	1	9.55366	2.09194	2.28119	53.0276	23.4587	4.33352	2.90557	45.9344	18.8696	1.89232
ENSBTAG00000020469	TMED8	transmembrane p24 trafficking protein family member 8 [Source:VGNC Symbol;Acc:VGNC:35939]			4.67553	#N/A	1	0	0	0	0.189704	0.195969	0	0.0468996	0	0	0
ENSBTAG00000006907	NEB	nebulin [Source:VGNC Symbol;Acc:VGNC:31977]			4.85598	#N/A	1	0	0	0	0.0187044	0.0140545	0.00307568	0	0	0.0026	0
ENSBTAG00000004171	GPHN	gephyrin [Source:VGNC Symbol;Acc:VGNC:54436]			5.0835	#N/A	1	0	0	0	0.151907	0.149616	0	0	0	0	0
ENSBTAG00000025398	0	ubiquitin D [Source:NCBI gene;Acc:504548]			5.56813	#N/A	1	0	0	0	0.848817	0.43328	0	0	0.70255	0.170607	0
ENSBTAG00000005514	TRIO	trio Rho guanine nucleotide exchange factor [Source:VGNC Symbol;Acc:VGNC:36356]			5.574	#N/A	1	0	0	0	0.0916762	0.0981802	0	0	0	0	0
ENSBTAG00000021687	JADE2	jade family PHD finger 2 [Source:VGNC Symbol;Acc:VGNC:30359]			5.79336	#N/A	1	0	0	0	0.0843882	0.113344	0	0	0.0537118	0	0
ENSBTAG00000014610	GPAA1	glycosylphosphatidylinositol anchor attachment 1 [Source:VGNC Symbol;Acc:VGNC:29508]			5.97888	#N/A	1	0	0	0	0.326772	0.304263	0	0	0	0	0
ENSBTAG00000021614	TASP1	taspase 1 [Source:VGNC Symbol;Acc:VGNC:35615]			6.25162	#N/A	1	1.03756	0	0	2.4288	2.76006	0.196412	0.265088	3.7e-08	0	0.51304
ENSBTAG00000008301	WNK2	WNK lysine deficient protein kinase 2 [Source:VGNC Symbol;Acc:VGNC:36950]			6.38049	#N/A	1	0.00049006	0	0	0.0549105	0.228971	7.64e-05	0	0	0	0
ENSBTAG00000048159	TAB3	TGF-beta activated kinase 1 (MAP3K7) binding protein 3 [Source:VGNC Symbol;Acc:VGNC:56955]			6.54472	#N/A	1	0	0	0	0.798552	0.308683	0	0	0	0	0
ENSBTAG00000037634	0	guanylate binding protein 4 [Source:NCBI gene;Acc:613313]			6.76507	#N/A	1	0.0696458	0	0	1.20238	0.735705	0.0725065	0.0482658	0.277615	0.299263	0
ENSBTAG00000013596	NR1H4	nuclear receptor subfamily 1 group H member 4 [Source:VGNC Symbol;Acc:VGNC:32232]	-0.759572	5.46467		6.22424	2	0.38039	0	0.180938	0.457838	0.412673	5.24311	4.00362	6.0128	6.03968	2.16102
ENSBTAG00000006548	MCCC1	methylcrotonoyl-CoA carboxylase 1 [Source:VGNC Symbol;Acc:VGNC:31298]	-0.490318	5.18196		5.67228	2	0	0.381228	2.63e-09	0.555883	0.720076	0.951436	0.994082	1.06946	1.37733	0.629261
ENSBTAG00000019838	SHC1	SHC adaptor protein 1 [Source:VGNC Symbol;Acc:VGNC:34590]	-0.366786	-1.58217		-1.21538	2	13.1408	15.9907	19.2379	8.06853	8.47864	6.29131	3.83357	8.55667	6.32608	6.99529
ENSBTAG00000004746	HELZ	helicase with zinc finger [Source:VGNC Symbol;Acc:VGNC:57142]	-0.235041	1.67635		1.9114	2	1.17901	1.23751	1.0333	4.65289	3.17662	4.43134	6.10599	4.69796	4.6736	2.2209
ENSBTAG00000040244	APOL3	apolipoprotein L, 3 [Source:NCBI gene;Acc:505078]	-0.22398	1.27997		1.50395	2	4.39412	3.37572	3.65021	7.93591	10.6782	7.87888	11.6532	9.49842	14.1667	9.8568
ENSBTAG00000007872	PSIP1	PC4 and SFRS1 interacting protein 1 [Source:VGNC Symbol;Acc:VGNC:33436]	-0.171761	1.00045		1.17221	2	36.3627	26.2305	25.7425	67.6132	53.8744	74.3177	64.5032	79.1934	63.6255	50.7425
ENSBTAG00000011529	ATR	ATR serine/threonine kinase [Source:VGNC Symbol;Acc:VGNC:26334]	-0.0734551	1.02489		1.09834	2	4.99857	4.56312	3.54382	9.45272	8.71472	9.38861	13.2997	10.3361	9.8607	6.98403
ENSBTAG00000006716	PTGS1	prostaglandin-endoperoxide synthase 1 [Source:VGNC Symbol;Acc:VGNC:33511]	-0.0715099	3.31055		3.38206	2	0.534172	0.120176	0.475287	0.211339	1.23359	3.2529	4.15819	2.96948	4.29474	2.56515
ENSBTAG00000004240	TMPO	thymopoietin [Source:VGNC Symbol;Acc:VGNC:36138]	-0.0558888	1.10859		1.16448	2	20.6891	12.0401	13.8975	31.7729	23.6495	35.0405	31.2103	39.8318	33.5351	37.2152
ENSBTAG00000004941	TEX35	testis expressed 35 [Source:NCBI gene;Acc:768066]	0.0199145	-1.37708		-1.397	2	13.1282	11.3518	7.45591	5.87618	3.92561	4.35509	4.49273	3.93736	4.37604	3.59441
ENSBTAG00000017722	F5	coagulation factor V [Source:VGNC Symbol;Acc:VGNC:28688]	0.0930111	1.80246		1.70945	2	14.4055	7.58681	13.7333	26.5149	19.6122	53.5366	44.0128	46.7923	34.5884	32.2124
ENSBTAG00000008072	SRSF10	serine and arginine rich splicing factor 10 [Source:VGNC Symbol;Acc:VGNC:35298]	0.12905	1.15472		1.02567	2	10.7442	15.2605	9.2489	24.9422	22.9354	32.2169	29.3864	27.088	23.5375	21.4643
ENSBTAG00000038042	CXCR2	C-X-C motif chemokine receptor 2 [Source:NCBI gene;Acc:782719]	0.137562	2.10198		1.96441	2	1.62309	1.06099	2.34154	4.97447	5.27103	10.3663	7.49048	7.48624	6.04221	4.82472
ENSBTAG00000033398	HKDC1	hexokinase domain containing 1 [Source:VGNC Symbol;Acc:VGNC:29867]	0.150057	-1.64424		-1.7943	2	0.684639	0.61787	0.522954	0.367406	0.364867	0.234009	0.131821	0.155627	0.231628	0.260402
ENSBTAG00000018224	GLP1R	glucagon like peptide 1 receptor [Source:VGNC Symbol;Acc:VGNC:29410]	0.184411	-8.07826		-8.26267	2	1.72407	1.64274	3.00543	1.68189	1.42919	3.61e-06	1.43e-05	6.55e-06	8.46e-08	0
ENSBTAG00000021135	RMI1	RecQ mediated genome instability 1 [Source:VGNC Symbol;Acc:VGNC:59200]	0.254715	1.40255		1.14784	2	8.67445	10.7971	8.75423	18.1874	16.5987	31.1527	30.1736	26.2067	19.2592	20.9049
ENSBTAG00000016622	TCAIM	T cell activation inhibitor, mitochondrial [Source:VGNC Symbol;Acc:VGNC:35677]	0.266336	1.28232		1.01599	2	1.42568	1.45931	1.24096	2.59013	2.64169	3.64488	3.55256	3.21007	2.79848	3.51199
ENSBTAG00000001325	UPB1	beta-ureidopropionase 1 [Source:VGNC Symbol;Acc:VGNC:36679]	0.272549	4.35339		4.08084	2	0	0	0	0	0	0.13495	0.125151	0.0890363	0.0920929	0.0687372
ENSBTAG00000001068	ZCWPW1	zinc finger CW-type and PWWP domain containing 1 [Source:VGNC Symbol;Acc:VGNC:37125]	0.308707	1.76483		1.45612	2	3.15118	1.72879	4.20342	5.62632	7.12346	9.65751	9.56186	8.01526	8.63086	11.1503
ENSBTAG00000000436	TNFAIP3	TNF alpha induced protein 3 [Source:VGNC Symbol;Acc:VGNC:36155]	0.375491	2.04769		1.6722	2	4.21805	2.5169	2.47274	5.74006	5.48853	14.596	14.3377	11.3571	9.15702	10.2369
ENSBTAG00000011880	CHAF1B	chromatin assembly factor 1 subunit B [Source:VGNC Symbol;Acc:VGNC:27267]	0.40501	2.09178		1.68677	2	3.43116	2.4092	3.95309	7.97077	7.04553	18.2133	17.5979	12.8346	9.41375	9.00017
ENSBTAG00000026369	ENC1	ectodermal-neural cortex 1 [Source:VGNC Symbol;Acc:VGNC:28489]	0.487162	-1.66498		-2.15214	2	8.58503	20.6385	21.9367	4.41471	4.42338	5.79288	3.7375	4.20745	3.47799	6.62823
ENSBTAG00000047621	0	0	0.542703	4.41295		3.87024	2	14.2884	4.69492	6.69048	2.23538	4.87919	224.626	287.231	129.209	111.295	78.3965
ENSBTAG00000030974	TUBA4A	tubulin alpha 4a [Source:VGNC Symbol;Acc:VGNC:49986]	0.546562	5.22609		4.67952	2	0.255396	0.816964	0.194461	0.413273	0.094867	22.8196	9.15765	12.1838	7.90678	13.0048
ENSBTAG00000016344	PIK3R6	phosphoinositide-3-kinase regulatory subunit 6 [Source:VGNC Symbol;Acc:VGNC:32897]	0.560814	3.57255		3.01173	2	1.95362	0.673828	1.55405	6.66171	4.82411	24.8607	12.2948	15.6423	7.56287	12.6039
ENSBTAG00000012881	EIF4G1	eukaryotic translation initiation factor 4 gamma 1 [Source:VGNC Symbol;Acc:VGNC:28415]	0.635565	2.01489		1.37933	2	1.22059	1.45485	2.16009	2.16833	1.18379	5.61185	6.99503	4.2043	4.54471	7.15721
ENSBTAG00000010153	ANXA3	annexin A3 [Source:VGNC Symbol;Acc:VGNC:25965]	0.649283	3.54988		2.9006	2	3.17816	0.848721	1.60008	11.921	6.84949	22.9139	27.2885	17.7737	9.46499	13.4783
ENSBTAG00000015919	PARM1	prostate androgen-regulated mucin-like protein 1 [Source:VGNC Symbol;Acc:VGNC:32587]	1.10881	3.37781		2.26899	2	3.14788	3.23138	4.38307	9.87164	12.3515	48.8617	46.2565	19.7323	16.9606	24.7478
ENSBTAG00000053735	PEG10	paternally expressed 10 [Source:NCBI gene;Acc:618138]	1.11553	3.78618		2.67065	2	0.197456	0.211156	0.290192	1.96505	0.803401	4.99905	2.57237	1.9489	1.26683	2.97834
ENSBTAG00000014471	PALM2	paralemmin 2 [Source:NCBI gene;Acc:100532750]	1.15847	4.02376		2.86529	2	0.547601	0.205228	0.497423	2.95893	1.63802	8.90698	6.1118	4.31036	2.03411	5.24962
ENSBTAG00000003809	PLCD4	phospholipase C delta 4 [Source:VGNC Symbol;Acc:VGNC:32986]	1.22308	4.79733		3.57425	2	0.537344	0.739987	0.331473	0.556193	0.664132	18.2825	21.906	7.23036	5.98594	8.5978
ENSBTAG00000040512	PCP4L1	Purkinje cell protein 4 like 1 [Source:VGNC Symbol;Acc:VGNC:32645]	1.24864	2.73047		1.48183	2	6.20285	4.43893	9.81524	9.93075	10.4229	38.2136	48.0796	18.7912	19.8459	48.2955
ENSBTAG00000004906	CCNE2	cyclin E2 [Source:VGNC Symbol;Acc:VGNC:26967]	1.26842	3.24064		1.97222	2	7.55556	4.09121	9.77754	22.8711	16.6153	94.1022	59.5581	35.0205	22.8143	57.4627
ENSBTAG00000000735	BCL2A1	BCL2 related protein A1 [Source:VGNC Symbol;Acc:VGNC:57345]	1.2869	3.07536		1.78846	2	9.84157	7.75985	6.87467	16.4758	16.3722	86.8845	77.3279	34.8796	25.6483	55.3048
ENSBTAG00000003458	CDCA7	cell division cycle associated 7 [Source:VGNC Symbol;Acc:VGNC:27086]	1.32734	3.9109		2.58355	2	3.22705	1.31989	8.13747	11.7504	10.3163	64.0833	59.8806	22.8905	19.1443	35.3154
ENSBTAG00000011961	0	pro-platelet basic protein [Source:NCBI gene;Acc:613723]	1.33628	3.78987		2.45359	2	25.6473	101.027	40.1478	26.8807	39.1709	771.566	684.239	312.536	243.663	577.243
ENSBTAG00000008300	FN1	fibronectin 1 [Source:VGNC Symbol;Acc:VGNC:29056]	1.40098	3.92864		2.52766	2	13.9314	9.64292	16.5426	7.03816	5.72007	323.583	176.543	108.601	61.09	161.888
ENSBTAG00000003569	DZIP1	DAZ interacting zinc finger protein 1 [Source:VGNC Symbol;Acc:VGNC:28284]	1.42429	4.04558		2.62129	2	0.266741	0.100156	0.177206	0.305317	0.134012	3.27986	2.84282	1.24991	1.02474	2.83135
ENSBTAG00000034393	FAM149A	family with sequence similarity 149 member A [Source:VGNC Symbol;Acc:VGNC:55045]	1.49884	9.5062		8.00736	2	0	0	0	0	0	2.98359	2.24984	1.04674	0.56234	1.51273
ENSBTAG00000015562	PLBD1	phospholipase B domain containing 1 [Source:VGNC Symbol;Acc:VGNC:32978]	1.50794	9.37336		7.86542	2	0	6.62e-10	7.72e-05	0.386291	0.435954	2.31258	5.61311	1.2369	1.66519	4.60022
ENSBTAG00000012715	KIF26B	kinesin family member 26B [Source:VGNC Symbol;Acc:VGNC:58385]	1.54051	7.19312		5.65261	2	0	0	0	0	0	0.282104	0.182075	0.091396	0.0644331	0.206591
ENSBTAG00000013148	CLDN1	claudin 1 [Source:VGNC Symbol;Acc:VGNC:27402]	1.62693	3.01708		1.39015	2	1.40254	1.47976	1.81859	2.87567	2.44636	12.7652	14.2238	4.9791	3.93981	12.9086
ENSBTAG00000010371	CHAC1	ChaC glutathione specific gamma-glutamylcyclotransferase 1 [Source:VGNC Symbol;Acc:VGNC:27262]	1.81426	3.30286		1.4886	2	2.66454	1.4594	1.75975	1.50655	2.044	19.8248	19.583	6.78217	4.8388	19.1528
ENSBTAG00000022622	CISH	cytokine inducible SH2 containing protein [Source:VGNC Symbol;Acc:VGNC:27374]	1.83371	4.4995		2.66579	2	1.20417	1.00686	0.986995	1.67487	1.34804	36.4393	30.9734	9.0648	5.75581	13.9194
ENSBTAG00000017895	CLEC10A	C-type lectin domain containing 10A [Source:VGNC Symbol;Acc:VGNC:55799]	1.83609	6.83384		4.99775	2	0.996488	0.560241	0.537178	8.49159	4.71983	65.8233	135.377	22.2082	24.6202	60.0886
ENSBTAG00000001626	CTPS1	CTP synthase 1 [Source:VGNC Symbol;Acc:VGNC:27808]	1.84566	4.06482		2.21916	2	0.632959	0.847136	2.43389	2.78948	2.05341	24.8501	17.7016	6.53531	4.42082	15.7458
ENSBTAG00000026275	CCL24	C-C motif chemokine ligand 24 [Source:VGNC Symbol;Acc:VGNC:26950]	1.86038	6.11205		4.25167	2	2.52414	3.1591	31.7929	7.88976	7.48975	357.637	360.753	138.416	115.743	691.801
ENSBTAG00000006910	ASRGL1	asparaginase and isoaspartyl peptidase 1 [Source:VGNC Symbol;Acc:VGNC:26223]	1.88782	3.80141		1.91359	2	32.3639	28.104	48.0778	21.4989	33.1648	559.655	573.665	155.343	131.659	423.933
ENSBTAG00000000448	BDH1	3-hydroxybutyrate dehydrogenase 1 [Source:VGNC Symbol;Acc:VGNC:26457]	1.9203	3.8884		1.9681	2	0.730623	1.40288	1.15875	0.26174	0.288444	22.443	15.5987	5.56439	3.49408	12.5972
ENSBTAG00000053347	0	0	1.92454	4.00903		2.08449	2	1.60064	2.27384	0.716957	1.96296	1.54155	29.1994	19.5849	7.82041	5.21936	24.0385
ENSBTAG00000052510	CCL26	C-C motif chemokine ligand 26 [Source:NCBI gene;Acc:508387]	1.94664	7.07974		5.1331	2	0.232334	0.0372526	0.335261	0.559103	0.448494	27.5715	22.6572	7.05297	5.77435	21.7833
ENSBTAG00000001191	CCL17	C-C motif chemokine ligand 17 [Source:VGNC Symbol;Acc:VGNC:26945]	2.01576	12.5599		10.5442	2	0.126903	0.23346	0.155264	0.167351	0.155923	1682.09	1422.98	414.938	210.217	645.437
ENSBTAG00000012991	PRUNE2	prune homolog 2 with BCH domain [Source:VGNC Symbol;Acc:VGNC:33429]	2.23725	5.02129		2.78404	2	0.1591	1.3293	0.437624	0.0454425	0.0602434	17.4603	13.8385	3.89191	2.90665	15.7846
ENSBTAG00000000873	SLC13A3	solute carrier family 13 member 3 [Source:VGNC Symbol;Acc:VGNC:34675]	2.25021	4.67836		2.42815	2	0.365791	0.484206	1.2234	0.0964877	0.0523313	16.3361	21.2138	4.07828	2.8918	11.6878
ENSBTAG00000006552	LAMP3	lysosomal associated membrane protein 3 [Source:VGNC Symbol;Acc:VGNC:30777]	2.25238	5.44624		3.19386	2	2.14451	1.29781	0.742191	6.22928	6.197	102.584	60.4871	17.3831	9.27749	35.0133
ENSBTAG00000002929	IRF4	interferon regulatory factor 4 [Source:VGNC Symbol;Acc:VGNC:30275]	2.31799	5.09832		2.78034	2	0.298907	0.761026	0.281619	1.42296	0.694274	20.5985	11.4193	3.51073	2.52945	12.8964
ENSBTAG00000008352	ART4	ADP-ribosyltransferase 4 [Source:VGNC Symbol;Acc:VGNC:49134]	2.77792	10.3807		7.60279	2	0	0	0	0	0	13.0213	12.8511	2.22744	1.62348	12.8461
ENSBTAG00000050354	0	keratin-associated protein 9-3-like [Source:NCBI gene;Acc:112442671]	3.06193	7.70671		4.64478	2	0	0	0	0	0	4.93272	5.07537	0.893619	0.315937	3.63465
ENSBTAG00000017718	CCL22	C-C motif chemokine ligand 22 [Source:VGNC Symbol;Acc:VGNC:26949]	3.27908	10.6364		7.35735	2	1.92287	0.863321	7.37718	0.197643	0.260583	5398.15	2906.76	694.582	231.104	3490.56
ENSBTAG00000039727	DCLK3	doublecortin like kinase 3 [Source:VGNC Symbol;Acc:VGNC:59331]	4.06175	9.26022		5.19847	2	0	0	0	0	0	2.76038	2.14347	0.178126	0.0930374	1.72714
ENSBTAG00000017266	ITGA6	integrin subunit alpha 6 [Source:VGNC Symbol;Acc:VGNC:30318]		-1.45811	-2.0219	#N/A	2	1.25593	0.897438	0.965147	0.236272	0.297951	0.291247	0.471475	0.549258	0.369334	0.453387
ENSBTAG00000025308	STON2	stonin 2 [Source:VGNC Symbol;Acc:VGNC:35413]		-1.21074	1.03091	#N/A	2	2.17173	2.21113	1.7403	5.14038	3.71089	0.827011	0.850262	3.46747	3.74111	1.04218
ENSBTAG00000019700	PC	pyruvate carboxylase [Source:VGNC Symbol;Acc:VGNC:56274]		-1.0812	1.12538	#N/A	2	2.14051	1.99083	1.35477	4.42998	3.84655	1.07644	0.942674	3.58499	2.52997	0.680195
ENSBTAG00000007490	SULF2	sulfatase 2 [Source:VGNC Symbol;Acc:VGNC:35466]		1.04704	-2.2974	#N/A	2	1.80928	1.26744	2.16235	0.315766	0.408981	4.08714	2.97148	0.857138	0.709677	4.01066
ENSBTAG00000016661	USP18	ubiquitin specific peptidase 18 [Source:NCBI gene;Acc:515202]		1.1054	1.23117	#N/A	2	4.60131	5.63826	3.0709	12.8804	8.85577	10.5706	10.7958	11.5708	8.86013	7.83266
ENSBTAG00000037819	SFT2D2	SFT2 domain containing 2 [Source:VGNC Symbol;Acc:VGNC:34525]		1.13416	-1.24663	#N/A	2	22.6455	30.1473	27.2174	13.2334	10.5736	71.3508	71.3422	19.9919	15.8107	46.3995
ENSBTAG00000010069	EGR1	early growth response 1 [Source:VGNC Symbol;Acc:VGNC:52766]		1.26206	-2.34342	#N/A	2	24.2508	23.0891	24.9332	4.70226	5.26664	78.1879	63.2525	22.3349	13.5328	44.727
ENSBTAG00000033662	NCKAP1	NCK associated protein 1 [Source:VGNC Symbol;Acc:VGNC:31915]		1.3652	-2.68836	#N/A	2	1.63732	0.80246	0.88239	0.142479	0.200603	3.10735	3.01105	1.47052	1.46592	2.72355
ENSBTAG00000038426	CD1B	CD1b molecule [Source:NCBI gene;Acc:509004]		1.8735	-4.115	#N/A	2	34.1486	24.496	22.9793	1.97149	1.34367	172.77	103.071	35.2991	17.3268	60.2083
ENSBTAG00000020261	CDH26	cadherin 26 [Source:VGNC Symbol;Acc:VGNC:27102]		2.01443	-2.49895	#N/A	2	0.504171	0.695302	0.678972	0.132502	0.0942435	2.69975	2.54556	1.39442	1.40241	2.66777
ENSBTAG00000022004	FLNB	filamin B [Source:VGNC Symbol;Acc:VGNC:29034]		2.15481	-1.17998	#N/A	2	2.26194	1.92588	2.6697	1.1324	0.976365	11.2265	9.57254	1.76876	1.70189	10.9055
ENSBTAG00000001945	ARG2	arginase 2 [Source:VGNC Symbol;Acc:VGNC:26071]		2.63012	-1.74211	#N/A	2	3.79938	5.07057	3.67841	1.33205	1.26864	26.8342	33.2317	3.18726	3.28885	22.1236
ENSBTAG00000016163	OSM	oncostatin M [Source:VGNC Symbol;Acc:VGNC:32474]		2.85941	-2.14732	#N/A	2	2.19913	2.27928	1.86688	0.377036	0.641062	15.2038	14.4361	2.80154	1.92647	18.1318
ENSBTAG00000021957	LTBP2	latent transforming growth factor beta binding protein 2 [Source:VGNC Symbol;Acc:VGNC:31072]			-3.21971	-3.30655	2	4.96926	6.14269	8.46371	1.03347	0.502808	3.94623	3.90333	0.981932	0.475078	6.75839
ENSBTAG00000020242	0	cytokine receptor like factor 2 [Source:NCBI gene;Acc:529792]			-2.90007	-3.20819	2	69.7456	210.293	182.779	19.6835	19.3324	53.5461	71.4187	15.7057	16.6829	117.737
ENSBTAG00000044208	DUSP4	dual specificity phosphatase 4 [Source:VGNC Symbol;Acc:VGNC:28260]			-3.16413	-3.20767	2	10.5512	31.0914	22.1663	2.97848	1.73339	9.31832	7.65441	3.18615	1.54	12.8462
ENSBTAG00000012855	LPL	lipoprotein lipase [Source:VGNC Symbol;Acc:VGNC:30969]			-3.0272	-3.14918	2	739.623	616.837	807.106	124.714	68.955	430.885	224.166	118.279	64.1972	459.75
ENSBTAG00000011759	C1QL1	complement C1q like 1 [Source:VGNC Symbol;Acc:VGNC:26620]			-3.44845	-3.12067	2	19.534	49.2328	18.264	2.94055	2.14213	39.4364	27.6872	3.86801	2.67163	16.174
ENSBTAG00000001864	NR4A3	nuclear receptor subfamily 4 group A member 3 [Source:VGNC Symbol;Acc:VGNC:32247]			-3.35983	-3.11013	2	3.15106	3.86657	1.49868	0.416142	0.178097	3.21614	2.48218	0.358044	0.304044	1.55327
ENSBTAG00000047325	GNGT2	G protein subunit gamma transducin 2 [Source:VGNC Symbol;Acc:VGNC:29471]			-3.02099	-3.01524	2	4.84508	5.28277	2.9555	0.532602	0.492708	1.33808	2.14559	0.426166	0.64138	1.71142
ENSBTAG00000021672	RGS1	regulator of G protein signaling 1 [Source:VGNC Symbol;Acc:VGNC:33910]			-2.67747	-2.96374	2	290.026	836.974	496.574	81.6928	81.671	176.49	250.343	58.3142	80.6609	337.868
ENSBTAG00000013235	TINAGL1	tubulointerstitial nephritis antigen like 1 [Source:VGNC Symbol;Acc:VGNC:35875]			-2.86903	-2.92709	2	232.289	302.994	211.01	35.6565	34.837	166.977	203.439	35.6941	33.917	185.717
ENSBTAG00000053542	MMP12	matrix metallopeptidase 12 [Source:NCBI gene;Acc:526981]			-3.59918	-2.91782	2	2217.36	3301.09	2913.68	310.979	188.181	2014.02	1589.41	456.035	346.687	3473.78
ENSBTAG00000006367	CCN2	cellular communication network factor 2 [Source:VGNC Symbol;Acc:VGNC:27794]			-2.75225	-2.89257	2	40.6294	36.7335	49.1463	7.45512	5.7405	12.235	11.3824	6.65887	5.56266	36.3426
ENSBTAG00000020676	MMP9	matrix metallopeptidase 9 [Source:VGNC Symbol;Acc:VGNC:31531]			-2.77374	-2.8591	2	4472.65	4547.27	5630	688.334	813.858	1685.22	1759.16	716.33	733.942	4146.12
ENSBTAG00000021766	HBEGF	heparin binding EGF like growth factor [Source:VGNC Symbol;Acc:VGNC:29765]			-2.31779	-2.83669	2	12.348	28.9774	11.1346	3.15989	3.52162	12.6799	12.5351	2.47436	2.27702	8.61988
ENSBTAG00000045787	CDS1	CDP-diacylglycerol synthase 1 [Source:VGNC Symbol;Acc:VGNC:27155]			-2.77247	-2.81504	2	15.9832	43.6392	23.2612	3.98616	3.81009	8.11236	12.6905	3.69707	4.0772	18.2391
ENSBTAG00000019524	ITGAD	integrin subunit alpha D [Source:VGNC Symbol;Acc:VGNC:55055]			-2.8827	-2.78441	2	51.3465	34.5389	21.9411	8.09379	2.92645	26.5545	13.9954	8.15353	3.37386	14.8491
ENSBTAG00000001301	LRRC32	leucine rich repeat containing 32 [Source:VGNC Symbol;Acc:VGNC:54884]			-2.33308	-2.69843	2	2.89226	2.6942	3.17148	0.739255	0.490172	2.34462	2.54965	0.445262	0.515795	2.48821
ENSBTAG00000030182	MAPK11	mitogen-activated protein kinase 11 [Source:VGNC Symbol;Acc:VGNC:31214]			-3.46426	-2.6974	2	0.99289	0.86942	0.995577	0.0542256	0.13507	1.24966	1.54378	0.170573	0.139456	1.05995
ENSBTAG00000015996	GPC1	glypican 1 [Source:VGNC Symbol;Acc:VGNC:29523]			-2.67464	-2.61579	2	36.8783	69.2905	70.7438	7.98894	10.7314	35.4172	35.7454	9.92564	9.99839	54.3547
ENSBTAG00000006606	RFLNB	refilin B [Source:VGNC Symbol;Acc:VGNC:58403]			-2.90988	-2.60022	2	22.1024	32.7703	29.4596	3.78507	3.91052	19.575	24.4028	4.76042	5.01077	21.0546
ENSBTAG00000010366	HCRTR1	hypocretin receptor 1 [Source:VGNC Symbol;Acc:VGNC:29781]			-2.49665	-2.48795	2	37.7718	48.3086	27.8796	6.8037	7.0316	24.6513	25.7399	7.21747	7.12328	21.051
ENSBTAG00000002580	MYH14	myosin heavy chain 14 [Source:VGNC Symbol;Acc:VGNC:31796]			-2.18669	-2.4578	2	8.32557	12.5512	8.35398	1.59914	2.97668	2.47834	4.48429	1.32334	2.71784	5.1446
ENSBTAG00000035147	C19H17orf67	chromosome 19 C17orf67 homolog [Source:VGNC Symbol;Acc:VGNC:52657]			-2.2739	-2.41467	2	277.684	171.581	264.22	59.5766	41.6463	239.852	149.659	55.1557	35.7985	259.998
ENSBTAG00000018062	KIAA1522	KIAA1522 [Source:VGNC Symbol;Acc:VGNC:30570]			-2.3565	-2.40334	2	21.2887	15.2249	11.9317	4.71512	2.21058	12.3333	5.57038	3.94955	2.52948	8.56268
ENSBTAG00000031476	DLL1	delta like canonical Notch ligand 1 [Source:VGNC Symbol;Acc:VGNC:28094]			-2.17955	-2.38148	2	1.47218	1.4963	1.75363	0.323248	0.40145	0.984348	0.710652	0.290163	0.36573	0.77318
ENSBTAG00000014764	CD9	CD9 molecule [Source:VGNC Symbol;Acc:VGNC:27053]			-2.4197	-2.378	2	781.174	1429.23	1265.4	217.575	227.032	915.09	857.242	235.377	234.675	1239.24
ENSBTAG00000054394	0	0			-2.46701	-2.37625	2	1.41423	1.564	1.22397	0.20702	0.327949	1.03297	1.04719	0.247466	0.33946	0.831081
ENSBTAG00000018880	TRPV1	transient receptor potential cation channel subfamily V member 1 [Source:VGNC Symbol;Acc:VGNC:36397]			-2.17449	-2.33041	2	4.62679	4.69685	3.7365	0.962937	1.06139	2.91787	2.51056	0.893061	0.974617	2.71718
ENSBTAG00000008945	SDSL	serine dehydratase like [Source:VGNC Symbol;Acc:VGNC:34400]			-2.73806	-2.31593	2	46.6257	49.0322	34.302	9.36765	4.88465	50.8986	31.2415	11.0896	7.63707	47.1245
ENSBTAG00000004347	ADGRF5	adhesion G protein-coupled receptor F5 [Source:VGNC Symbol;Acc:VGNC:25665]			-2.49471	-2.29426	2	23.9802	24.0991	17.725	4.53842	3.65552	25.1849	20.56	4.97773	4.59593	24.3416
ENSBTAG00000002576	GLDN	gliomedin [Source:VGNC Symbol;Acc:VGNC:29396]			-2.1728	-2.28435	2	48.5256	48.8105	37.8247	10.7646	10.1289	31.8253	29.0034	10.9007	9.00367	19.7145
ENSBTAG00000046328	XG	Xg glycoprotein [Source:VGNC Symbol;Acc:VGNC:56960]			-2.20056	-2.24613	2	7.24935	6.60801	8.02755	1.37408	1.98828	2.74461	5.6487	1.20249	2.33392	4.28655
ENSBTAG00000011534	RAMP1	receptor activity modifying protein 1 [Source:VGNC Symbol;Acc:VGNC:55666]			-2.25159	-2.24229	2	21.6144	26.0888	15.1793	5.50068	3.76766	17.9452	10.7049	5.29409	4.14031	10.1113
ENSBTAG00000006262	LIMS2	LIM zinc finger domain containing 2 [Source:VGNC Symbol;Acc:VGNC:30891]			-2.79588	-2.23135	2	23.792	24.0083	21.9249	3.09615	3.98581	25.6222	25.8824	5.67191	5.04265	20.4288
ENSBTAG00000021899	PDE9A	phosphodiesterase 9A [Source:VGNC Symbol;Acc:VGNC:32688]			-2.65813	-2.21856	2	4.73419	8.14534	7.03921	0.993063	1.15633	6.15442	5.021	1.48609	1.51166	6.99251
ENSBTAG00000011412	LAMB1	laminin subunit beta 1 [Source:VGNC Symbol;Acc:VGNC:30772]			-2.69455	-2.21632	2	14.4183	22.0626	11.8339	2.1834	2.92793	12.9132	13.4172	3.41012	3.88383	13.1499
ENSBTAG00000009051	MMP19	matrix metallopeptidase 19 [Source:VGNC Symbol;Acc:VGNC:31523]			-2.10051	-2.21528	2	1039.58	1125.54	1171.33	307.526	242.725	813.68	737.764	268.519	249.428	978.426
ENSBTAG00000016982	MCOLN3	mucolipin 3 [Source:VGNC Symbol;Acc:VGNC:31320]			-2.3435	-2.209	2	51.9765	75.9351	28.5371	10.8672	9.32267	34.1905	27.4643	14.0322	8.96417	27.6486
ENSBTAG00000002326	LGALS3	galectin 3 [Source:VGNC Symbol;Acc:VGNC:30852]			-2.11066	-2.1981	2	3118.21	3935.74	4055.72	844.095	958.007	1944.93	2484.21	816.798	911.041	2608.29
ENSBTAG00000020665	GFRA2	GDNF family receptor alpha 2 [Source:VGNC Symbol;Acc:VGNC:29333]			-2.50676	-2.14912	2	108.91	48.2946	58.8116	14.4943	10.701	42.0562	33.2316	20.3005	13.1216	32.048
ENSBTAG00000002977	ECE1	endothelin converting enzyme 1 [Source:VGNC Symbol;Acc:VGNC:28302]			-2.94334	-2.1418	2	6.03531	15.2595	9.57904	1.86818	0.93004	12.9815	12.5824	2.5471	2.13519	13.6637
ENSBTAG00000011446	SEMA7A	semaphorin 7A [Source:VGNC Symbol;Acc:VGNC:53952]			-2.36996	-2.13683	2	167.13	181.651	156.284	34.0867	34.1612	125.096	108.221	42.9589	39.4298	110.924
ENSBTAG00000006928	OAT	ornithine aminotransferase [Source:VGNC Symbol;Acc:VGNC:50236]			-1.93504	-2.12026	2	352.698	1011.01	769.996	191.754	167.971	390.073	402.68	160.932	163.329	530.049
ENSBTAG00000050933	SHISA4	shisa family member 4 [Source:NCBI gene;Acc:617754]			-2.21255	-2.11575	2	4.17625	5.17162	5.31667	1.20512	0.986929	4.87772	4.53067	1.58045	0.882308	5.13814
ENSBTAG00000004588	KCNN4	potassium calcium-activated channel subfamily N member 4 [Source:VGNC Symbol;Acc:VGNC:30486]			-2.0545	-2.10486	2	55.2055	50.7034	53.1823	13.503	13.2457	46.5006	37.1381	14.832	11.8668	43.0213
ENSBTAG00000012082	TNFRSF12A	TNF receptor superfamily member 12A [Source:VGNC Symbol;Acc:VGNC:36162]			-2.04796	-2.08669	2	7.52888	10.2147	7.31265	2.027	2.13487	4.66064	6.55526	2.20563	1.97123	5.90131
ENSBTAG00000015163	TM4SF1	transmembrane 4 L six family member 1 [Source:VGNC Symbol;Acc:VGNC:35903]			-2.44919	-2.05029	2	53.5645	35.034	37.3529	12.2591	5.24999	66.7419	45.5968	16.7931	6.64648	46.0266
ENSBTAG00000039992	TUBA1C	tubulin alpha 1c [Source:NCBI gene;Acc:504244]			-2.24167	-2.0494	2	58.4415	47.627	63.0115	13.6909	11.4839	88.0196	45.7348	18.2561	11.7767	90.5441
ENSBTAG00000036078	EMP1	epithelial membrane protein 1 [Source:VGNC Symbol;Acc:VGNC:28481]			-1.82791	-2.03441	2	170.99	363.114	300.944	78.7644	78.5826	127.516	171.977	66.1274	74.7323	224.177
ENSBTAG00000021830	ENPP1	ectonucleotide pyrophosphatase/phosphodiesterase 1 [Source:VGNC Symbol;Acc:VGNC:28504]			-2.07595	-1.99548	2	315.845	434.206	837.097	108.049	136.304	349.677	372.931	113.135	153.343	633.483
ENSBTAG00000001246	ATP1A1	ATPase Na+/K+ transporting subunit alpha 1 [Source:VGNC Symbol;Acc:VGNC:26282]			-2.24516	-1.98634	2	2.40208	4.993	3.83891	1.0358	0.614788	2.72345	2.61418	0.925036	1.04312	3.32416
ENSBTAG00000016620	SIGLEC15	sialic acid binding Ig like lectin 15 [Source:VGNC Symbol;Acc:VGNC:34618]			-1.89357	-1.95669	2	32.8224	32.9171	34.7841	9.81704	9.27063	11.7763	11.0237	9.2217	9.5083	26.6508
ENSBTAG00000008185	RTN2	reticulon 2 [Source:VGNC Symbol;Acc:VGNC:34204]			-1.91429	-1.95597	2	4.846	7.50644	4.66128	1.4353	1.63812	2.86383	3.35124	1.47776	1.58051	2.9379
ENSBTAG00000003403	PADI2	peptidyl arginine deiminase 2 [Source:VGNC Symbol;Acc:VGNC:32546]			-1.82584	-1.94555	2	35.7616	55.8332	36.8084	10.2562	14.9331	25.4909	39.5773	9.54173	14.4488	26.6801
ENSBTAG00000017685	JUP	junction plakoglobin [Source:VGNC Symbol;Acc:VGNC:30388]			-2.15786	-1.94219	2	3.12411	4.57721	4.41585	0.910425	0.965335	3.92233	3.57864	1.23057	1.01636	2.64757
ENSBTAG00000023947	AVPI1	arginine vasopressin induced 1 [Source:VGNC Symbol;Acc:VGNC:26357]			-1.76253	-1.91792	2	103.746	143.786	117.725	35.7362	38.3718	68.7345	75.3739	32.7577	35.299	94.4723
ENSBTAG00000009987	ITGB3	integrin subunit beta 3 [Source:NCBI gene;Acc:282642]			-1.85976	-1.90706	2	223.098	298.741	316.704	85.605	75.1312	227.268	200.547	80.1707	79.085	329.065
ENSBTAG00000039366	0	CD1a molecule-like [Source:NCBI gene;Acc:515418]			-2.11099	-1.9015	2	32.1413	34.7978	38.8438	10.3668	7.2423	27.2857	28.9643	11.6724	8.85795	29.1864
ENSBTAG00000015837	P2RY12	purinergic receptor P2Y12 [Source:VGNC Symbol;Acc:VGNC:32525]			-1.76752	-1.88206	2	21.5821	33.5752	27.8912	9.76777	7.38579	17.757	14.7705	9.80131	6.47697	16.4007
ENSBTAG00000000942	SIPA1L2	signal induced proliferation associated 1 like 2 [Source:VGNC Symbol;Acc:VGNC:34629]			-2.76188	-1.85865	2	1.40398	1.74896	1.86408	0.401247	0.165166	2.06955	1.32714	0.610769	0.388617	1.83905
ENSBTAG00000012442	CTSB	cathepsin B [Source:VGNC Symbol;Acc:VGNC:27813]			-1.80114	-1.85103	2	16539.1	15267.5	11182.5	4265.8	4234.45	10709	10511.7	4041.67	4364.6	9742.97
ENSBTAG00000007657	SCARA3	scavenger receptor class A member 3 [Source:VGNC Symbol;Acc:VGNC:34322]			-1.95185	-1.8486	2	7.2907	11.059	6.54415	2.21566	2.18238	6.00744	4.86415	2.30488	2.55059	3.77327
ENSBTAG00000013057	CBLB	Cbl proto-oncogene B [Source:VGNC Symbol;Acc:VGNC:26809]			-1.82451	-1.82595	2	20.6955	21.978	25.669	7.6524	5.94453	19.6589	19.7338	6.59917	7.24643	37.0698
ENSBTAG00000007142	CPPED1	calcineurin like phosphoesterase domain containing 1 [Source:NCBI gene;Acc:537938]			-1.87047	-1.81314	2	32.2817	58.072	44.8447	9.22972	16.8988	31.6173	43.4595	10.6037	17.3815	40.6549
ENSBTAG00000014599	LRRC66	leucine rich repeat containing 66 [Source:VGNC Symbol;Acc:VGNC:31024]			-1.87967	-1.81292	2	36.5029	70.252	38.289	13.5955	12.8508	35.7908	40.2858	14.6781	13.7228	46.1004
ENSBTAG00000019665	IL1RN	interleukin 1 receptor antagonist [Source:VGNC Symbol;Acc:VGNC:30136]			-1.55824	-1.79571	2	23.016	24.352	29.8846	9.18172	9.02318	22.8224	21.4632	8.06552	7.77748	20.8984
ENSBTAG00000012774	RAB7B	RAB7B, member RAS oncogene family [Source:VGNC Symbol;Acc:VGNC:33661]			-1.80175	-1.77414	2	93.4742	221.413	174.063	42.8897	49.6877	119.285	101.054	45.9209	50.859	144.892
ENSBTAG00000013923	QPCT	glutaminyl-peptide cyclotransferase [Source:VGNC Symbol;Acc:VGNC:33598]			-1.74517	-1.74694	2	125.625	90.2579	83.4683	39.5949	24.1609	70.6655	56.4857	40.0174	24.6856	52.8552
ENSBTAG00000016933	IL27RA	interleukin 27 receptor subunit alpha [Source:VGNC Symbol;Acc:VGNC:30151]			-1.92141	-1.74217	2	28.3784	43.2835	55.4235	11.0228	11.5659	31.5694	29.9919	12.7745	13.4559	39.8782
ENSBTAG00000006619	MATK	megakaryocyte-associated tyrosine kinase [Source:VGNC Symbol;Acc:VGNC:31263]			-1.88291	-1.73982	2	56.1695	78.9324	112.261	22.2492	22.9708	66.4018	50.1884	30.4722	21.6035	92.6688
ENSBTAG00000009315	CDON	cell adhesion associated, oncogene regulated [Source:VGNC Symbol;Acc:VGNC:27151]			-1.69253	-1.73161	2	9.63595	10.1116	7.93924	2.59775	3.44662	5.99921	7.70382	2.27808	4.06947	8.08923
ENSBTAG00000023832	ADAM8	ADAM metallopeptidase domain 8 [Source:VGNC Symbol;Acc:VGNC:25612]			-1.76146	-1.73071	2	201.185	423.225	303.135	81.8229	102.183	268.422	290.361	89.334	103.466	302.862
ENSBTAG00000006663	CYTH1	cytohesin 1 [Source:VGNC Symbol;Acc:VGNC:55809]			-1.77617	-1.72886	2	5.50632	7.76796	4.49792	1.52649	2.02296	4.94669	4.89693	2.05588	1.66795	3.4434
ENSBTAG00000019138	KIF3C	kinesin family member 3C [Source:VGNC Symbol;Acc:VGNC:30604]			-1.97408	-1.71678	2	1.62074	1.95281	1.82675	0.549154	0.418529	1.34609	1.04877	0.727348	0.465828	1.53053
ENSBTAG00000010641	APH1B	aph-1 homolog B, gamma-secretase subunit [Source:VGNC Symbol;Acc:VGNC:26014]			-1.91518	-1.71085	2	35.3868	67.0363	35.4916	10.2527	14.581	26.5927	43.3572	12.5339	16.8847	35.0515
ENSBTAG00000020350	DUSP2	dual specificity phosphatase 2 [Source:VGNC Symbol;Acc:VGNC:28255]			-2.35618	-1.70435	2	29.562	34.3869	16.5006	5.33787	5.18802	38.3619	30.8622	9.1793	7.8437	18.5082
ENSBTAG00000051316	0	0			-1.49891	-1.70293	2	183.543	147.147	182.659	67.1348	58.2872	121.081	85.3387	56.1622	53.8617	130.884
ENSBTAG00000008585	ARHGEF10	Rho guanine nucleotide exchange factor 10 [Source:VGNC Symbol;Acc:VGNC:26104]			-1.45975	-1.69998	2	1.80455	1.96652	2.5615	0.901294	0.700223	1.48841	1.25788	0.927622	0.496997	1.43356
ENSBTAG00000008545	ATF3	activating transcription factor 3 [Source:VGNC Symbol;Acc:VGNC:26241]			-1.78079	-1.69832	2	87.7336	188.351	110.671	41.2644	34.0167	123.026	115.679	47.4198	34.8614	122.211
ENSBTAG00000003312	CHST15	carbohydrate sulfotransferase 15 [Source:VGNC Symbol;Acc:VGNC:27343]			-2.23469	-1.66961	2	8.23557	15.5621	13.8437	2.61097	2.80341	12.5627	10.5146	4.13527	4.09027	16.4165
ENSBTAG00000016805	SGMS2	sphingomyelin synthase 2 [Source:VGNC Symbol;Acc:VGNC:34544]			-1.84905	-1.66646	2	5.45796	4.64692	5.14894	1.50857	1.43022	4.01646	4.19126	2.10595	1.35497	2.66575
ENSBTAG00000000009	FOXF1	forkhead box F1 [Source:VGNC Symbol;Acc:VGNC:29084]			-1.86384	-1.65857	2	27.3399	50.8685	25.0512	9.93819	8.98872	30.8352	28.1183	12.3216	10.1421	19.9328
ENSBTAG00000021215	VWA5A	von Willebrand factor A domain containing 5A [Source:VGNC Symbol;Acc:VGNC:36853]			-1.90515	-1.65782	2	114.74	112.327	94.7274	29.8318	30.2387	89.993	75.2325	38.5593	34.6799	92.9393
ENSBTAG00000004269	SGK1	serum/glucocorticoid regulated kinase 1 [Source:VGNC Symbol;Acc:VGNC:34541]			-1.90828	-1.65581	2	142.954	237.436	165.676	43.028	58.3936	113.346	135.199	59.8463	62.4111	138.032
ENSBTAG00000009153	MLXIPL	MLX interacting protein like [Source:VGNC Symbol;Acc:VGNC:31510]			-2.02599	-1.65221	2	3.33802	2.43252	2.60335	0.56361	0.884588	4.49388	4.08805	0.859703	1.06138	4.30811
ENSBTAG00000021308	IRS1	insulin receptor substrate 1 [Source:VGNC Symbol;Acc:VGNC:30283]			-1.36104	-1.63695	2	2.0902	2.10514	2.41629	0.88498	0.901406	1.2061	1.26255	0.834027	0.685915	1.96565
ENSBTAG00000003762	GNB5	G protein subunit beta 5 [Source:VGNC Symbol;Acc:VGNC:29462]			-1.26754	-1.61069	2	11.6213	16.7624	12.0535	5.58973	6.0676	9.95726	8.92658	4.53701	4.90482	9.43571
ENSBTAG00000032680	TMEM63B	transmembrane protein 63B [Source:VGNC Symbol;Acc:VGNC:36104]			-1.62196	-1.60091	2	19.7998	22.3244	19.2638	7.09325	6.88812	14.5896	12.9445	7.31493	7.32471	16.4503
ENSBTAG00000016414	VDR	vitamin D receptor [Source:VGNC Symbol;Acc:VGNC:36784]			-1.44215	-1.60088	2	12.2188	21.5335	15.6547	5.46116	6.98729	13.3082	16.2814	5.09863	6.45228	15.4623
ENSBTAG00000014191	QSOX1	quiescin sulfhydryl oxidase 1 [Source:VGNC Symbol;Acc:VGNC:33605]			-1.43646	-1.59601	2	7.69934	7.15213	11.2051	3.77985	2.84363	7.17453	6.06602	3.16209	2.85201	8.19645
ENSBTAG00000015032	CD14	CD14 molecule [Source:VGNC Symbol;Acc:VGNC:27003]			-1.50233	-1.59408	2	1263.74	2076.66	1884.41	616.653	650.614	1071.02	1141.28	563.281	661.368	1499.81
ENSBTAG00000014299	RHOC	ras homolog family member C [Source:VGNC Symbol;Acc:VGNC:55672]			-1.76303	-1.58755	2	21.6113	13.9146	15.823	4.88729	5.50003	30.602	22.7368	6.06339	5.96077	18.2003
ENSBTAG00000000977	CADM1	cell adhesion molecule 1 [Source:VGNC Symbol;Acc:VGNC:26694]			-1.47073	-1.56674	2	1089.39	825.934	897.543	321.793	394.622	484.386	642.091	289.699	404.166	649.762
ENSBTAG00000004322	FOS	Fos proto-oncogene, AP-1 transcription factor subunit [Source:VGNC Symbol;Acc:VGNC:29073]			-1.2448	-1.56453	2	114.155	143.838	98.26	52.9291	51.2898	71.8685	68.2306	45.2293	40.4605	51.1748
ENSBTAG00000034885	RGCC	regulator of cell cycle [Source:VGNC Symbol;Acc:VGNC:33902]			-1.85445	-1.5635	2	31.4452	31.198	28.2271	9.89911	7.70451	32.1953	26.6108	13.3174	8.75964	23.3938
ENSBTAG00000000944	LPCAT1	lysophosphatidylcholine acyltransferase 1 [Source:VGNC Symbol;Acc:VGNC:30961]			-1.52822	-1.55947	2	82.4664	98.446	93.9041	33.5725	32.8264	58.9249	54.5894	33.4612	33.2127	64.1561
ENSBTAG00000005732	TRAPPC3	trafficking protein particle complex 3 [Source:VGNC Symbol;Acc:VGNC:36288]			-2.37831	-1.55218	2	10.6007	9.16456	7.21329	2.36202	1.39903	15.0958	11.1366	3.59283	2.97504	8.12471
ENSBTAG00000000283	CSF1	colony stimulating factor 1 [Source:VGNC Symbol;Acc:VGNC:27753]			-1.44841	-1.53636	2	44.9993	30.9655	28.5433	11.3951	14.979	29.6299	28.2215	12.8041	12.4775	36.4336
ENSBTAG00000006870	RASGEF1A	RasGEF domain family member 1A [Source:VGNC Symbol;Acc:VGNC:33743]			-1.57255	-1.518	2	59.9612	52.4971	45.0681	17.1872	19.4831	35.1714	34.4039	16.4733	23.219	36.1681
ENSBTAG00000005947	PLAU	plasminogen activator, urokinase [Source:VGNC Symbol;Acc:VGNC:32975]			-1.42123	-1.51494	2	258.667	340.384	235.713	113.352	103.397	233.379	250.82	112.367	96.1891	266.644
ENSBTAG00000021568	VWCE	von Willebrand factor C and EGF domains [Source:VGNC Symbol;Acc:VGNC:36859]			-3.174	-1.50995	2	8.96572	12.559	8.06752	1.17353	1.07641	20.668	12.7725	5.2844	2.45375	13.199
ENSBTAG00000005140	0	neuroblastoma suppressor of tumorigenicity 1 [Source:NCBI gene;Acc:535280]			-1.4607	-1.50759	2	73.1966	55.914	64.2053	23.3976	25.4102	66.7175	52.3987	24.041	24.3143	54.1112
ENSBTAG00000005275	PKIG	cAMP-dependent protein kinase inhibitor gamma [Source:VGNC Symbol;Acc:VGNC:32942]			-1.45376	-1.5044	2	21.5772	19.8249	21.3513	6.71245	9.47366	21.2938	23.6606	8.15679	7.66969	19.1174
ENSBTAG00000006125	PLK3	polo like kinase 3 [Source:VGNC Symbol;Acc:VGNC:33035]			-1.34519	-1.494	2	16.3891	23.6546	19.1794	7.94733	8.13218	21.8681	17.9306	8.54027	6.47812	24.9731
ENSBTAG00000009996	DOT1L	DOT1 like histone lysine methyltransferase [Source:VGNC Symbol;Acc:VGNC:50607]			-1.44604	-1.49036	2	21.1072	38.3553	29.156	11.6341	10.5118	26.0509	19.0211	11.8915	10.2297	21.0736
ENSBTAG00000017567	ACACA	acetyl-CoA carboxylase alpha [Source:VGNC Symbol;Acc:VGNC:25519]			-1.24696	-1.48672	2	4.72448	4.6236	4.79856	1.82038	2.39973	5.67964	3.9861	1.44343	2.34937	6.01644
ENSBTAG00000001197	SLAMF7	SLAM family member 7 [Source:VGNC Symbol;Acc:VGNC:34655]			-1.30806	-1.48441	2	380.72	512.458	347.629	192.144	158.312	260.427	329.949	153.315	163.399	270.046
ENSBTAG00000000917	BMP1	bone morphogenetic protein 1 [Source:VGNC Symbol;Acc:VGNC:26514]			-1.40259	-1.48432	2	38.7538	42.7742	55.1128	18.3317	17.5307	32.3864	28.1676	18.5094	16.4659	47.1477
ENSBTAG00000001078	SRL	sarcalumenin [Source:NCBI gene;Acc:513912]			-1.86611	-1.48179	2	10.3294	6.96463	8.04378	1.98795	2.82498	7.05141	11.0114	2.59928	3.94088	9.03959
ENSBTAG00000014761	PGA5	pepsinogen 5, group I (pepsinogen A) [Source:NCBI gene;Acc:414350]			-2.0454	-1.47688	2	16.3808	21.614	14.6772	3.73388	5.18164	19.5555	20.5255	6.42299	7.00767	17.8166
ENSBTAG00000021029	PRR5L	proline rich 5 like [Source:VGNC Symbol;Acc:VGNC:33401]			-1.3997	-1.46653	2	15.5077	20.13	11.6754	6.21025	5.99919	13.1067	12.8792	6.02238	5.89976	7.25732
ENSBTAG00000031441	FXYD5	FXYD domain containing ion transport regulator 5 [Source:VGNC Symbol;Acc:VGNC:29158]			-1.27843	-1.46617	2	219.004	200.231	169.91	90.3277	79.5988	119.306	111.495	80.5293	73.268	121.838
ENSBTAG00000020729	DHRS7	dehydrogenase/reductase 7 [Source:VGNC Symbol;Acc:VGNC:28043]			-1.56228	-1.45803	2	8.14234	9.96991	7.62829	2.59367	3.56376	7.83345	8.78904	3.31274	3.4607	7.16973
ENSBTAG00000000507	NR4A1	nuclear receptor subfamily 4 group A member 1 [Source:VGNC Symbol;Acc:VGNC:32245]			-1.30549	-1.44849	2	12.5491	11.5835	7.73663	5.04188	3.89008	7.91547	6.29065	5.0022	3.30844	4.92005
ENSBTAG00000009615	ANXA2	annexin A2 [Source:NCBI gene;Acc:282689]			-1.52642	-1.4428	2	513.996	892.547	1012.32	282.399	282.385	558.725	665.381	298.872	312.203	869.404
ENSBTAG00000015050	HCN2	hyperpolarization activated cyclic nucleotide gated potassium and sodium channel 2 [Source:VGNC Symbol;Acc:VGNC:29777]			-1.27159	-1.43922	2	58.2579	30.8485	30.7208	15.2224	18.007	21.5643	21.5548	15.9289	14.5188	21.8126
ENSBTAG00000021818	ADGRE5	adhesion G protein-coupled receptor E5 [Source:VGNC Symbol;Acc:VGNC:55196]			-1.55301	-1.4373	2	263.514	228.189	228.875	83.5232	87.8064	221.396	237.36	90.8361	100.182	221.37
ENSBTAG00000017349	PCDHGC3	protocadherin gamma subfamily A, 2 [Source:NCBI gene;Acc:539654]			-1.30303	-1.42171	2	28.9586	39.8809	36.55	13.9837	15.5836	16.8341	17.0034	12.1405	16.1523	24.0931
ENSBTAG00000006957	SLC2A8	solute carrier family 2 member 8 [Source:VGNC Symbol;Acc:VGNC:34803]			-1.356	-1.42072	2	85.5093	105.844	83.636	34.7624	40.518	62.7687	64.8983	35.3806	38.5865	72.4972
ENSBTAG00000015711	BTG2	BTG anti-proliferation factor 2 [Source:VGNC Symbol;Acc:VGNC:26598]			-1.79696	-1.41339	2	25.9875	35.9608	26.7756	9.91849	7.7002	50.3167	37.8177	13.1451	9.89955	41.9418
ENSBTAG00000011256	MYO1B	myosin IB [Source:VGNC Symbol;Acc:VGNC:31817]			-1.74005	-1.41138	2	8.3433	8.11575	5.56449	2.25455	2.31921	12.6738	13.0108	3.42258	2.5107	8.46004
ENSBTAG00000011922	PLEC	plectin [Source:VGNC Symbol;Acc:VGNC:53873]			-1.79428	-1.40505	2	2.49953	3.20421	2.26104	0.833279	0.757569	1.34173	2.00208	1.34217	0.839414	1.2033
ENSBTAG00000005432	CAPG	capping actin protein, gelsolin like [Source:VGNC Symbol;Acc:VGNC:26739]			-1.10468	-1.40044	2	670.235	622.957	767.569	346.077	323.498	358.77	373.01	274.316	285.407	515.479
ENSBTAG00000002362	APOLD1	apolipoprotein L domain containing 1 [Source:VGNC Symbol;Acc:VGNC:26033]			-1.61135	-1.37598	2	2.85388	2.68393	1.63276	0.798695	0.805712	2.66651	2.41909	0.968354	0.980811	2.36639
ENSBTAG00000021035	CTSK	cathepsin K [Source:VGNC Symbol;Acc:VGNC:27817]			-1.17573	-1.36837	2	5684.32	4240.73	4108.59	2194.59	2147.7	2173.44	2236.89	1855.9	2044.93	3569.22
ENSBTAG00000010976	KANK1	KN motif and ankyrin repeat domains 1 [Source:VGNC Symbol;Acc:VGNC:56976]			-1.1242	-1.35963	2	30.3777	40.6421	23.1593	12.5747	17.4841	16.4633	14.7689	13.1998	12.6983	18.6704
ENSBTAG00000053188	0	0			-1.4438	-1.33729	2	49.2894	27.6937	37.0462	17.5509	11.7397	24.3325	23.8914	19.5565	12.3827	27.4414
ENSBTAG00000001294	PPP1R15A	protein phosphatase 1 regulatory subunit 15A [Source:VGNC Symbol;Acc:VGNC:33228]			-1.42376	-1.33521	2	37.0103	44.653	28.8018	12.7713	15.5334	35.5787	48.1954	14.1743	16.5925	31.1793
ENSBTAG00000005105	PAFAH2	platelet activating factor acetylhydrolase 2 [Source:VGNC Symbol;Acc:VGNC:32552]			-1.23544	-1.33433	2	46.564	68.5519	61.49	24.673	27.3966	34.4203	38.7105	23.2224	26.8973	45.4313
ENSBTAG00000005557	AFDN	afadin, adherens junction formation factor [Source:VGNC Symbol;Acc:VGNC:25709]			-1.87125	-1.33304	2	10.1806	16.441	10.4729	3.57976	3.35582	12.9496	9.58076	5.13475	5.20483	8.63939
ENSBTAG00000013215	MREG	melanoregulin [Source:VGNC Symbol;Acc:VGNC:31601]			-1.38688	-1.32333	2	72.5322	122.652	117.639	39.1126	42.6088	73.3491	88.9794	43.2925	44.1945	94.1109
ENSBTAG00000020352	PAQR5	progestin and adipoQ receptor family member 5 [Source:VGNC Symbol;Acc:VGNC:32577]			-1.24924	-1.31067	2	17.0198	34.1665	20.8225	10.4571	9.92879	18.6817	17.8625	10.9206	9.13762	19.0495
ENSBTAG00000010943	SLC22A23	solute carrier family 22 member 23 [Source:VGNC Symbol;Acc:VGNC:54236]			-1.42749	-1.30995	2	14.1746	17.3887	14.4542	5.75223	6.21233	10.9892	10.9263	5.42032	8.46154	11.7765
ENSBTAG00000008487	VPS37D	VPS37D subunit of ESCRT-I [Source:VGNC Symbol;Acc:VGNC:54510]			-1.32064	-1.30495	2	3.22303	4.27295	3.20432	1.43279	1.49809	2.07887	1.82538	1.4652	1.59027	2.25571
ENSBTAG00000012847	NIBAN2	niban apoptosis regulator 2 [Source:VGNC Symbol;Acc:VGNC:54427]			-1.16281	-1.30211	2	246.264	239.025	236.114	111.128	113.872	163.115	157.322	108.256	101.444	177.937
ENSBTAG00000037735	C5AR2	complement component 5a receptor 2 [Source:VGNC Symbol;Acc:VGNC:26642]			-1.02354	-1.29952	2	84.5652	113.408	80.6284	53.5968	42.2794	52.8736	55.2058	43.1237	37.815	57.1082
ENSBTAG00000016819	FABP3	fatty acid binding protein 3 [Source:VGNC Symbol;Acc:VGNC:28697]			-1.3145	-1.29934	2	219.269	317.421	188.788	94.7633	106.432	222.301	234.061	90.0452	120.089	242.199
ENSBTAG00000019076	PAK6	p21 (RAC1) activated kinase 6 [Source:NCBI gene;Acc:539224]			-1.91398	-1.29559	2	2.11749	1.93814	1.92113	0.851422	0.364178	1.8455	1.25619	0.980636	0.77106	1.46948
ENSBTAG00000019280	CRYBB1	crystallin beta B1 [Source:VGNC Symbol;Acc:VGNC:27736]			-1.35139	-1.29519	2	28.0148	22.0974	27.0698	9.14563	11.9031	14.7552	18.1135	9.64021	12.9446	16.3824
ENSBTAG00000045822	C15H11orf96	chromosome 15 C11orf96 homolog [Source:NCBI gene;Acc:100270684]			-1.36055	-1.29491	2	110.433	82.44	55.5936	33.0538	31.8424	65.3163	53.7741	37.9596	31.9936	61.1175
ENSBTAG00000014898	HK3	hexokinase 3 [Source:VGNC Symbol;Acc:VGNC:29866]			-1.82812	-1.28074	2	216.279	162.111	281.991	73.0236	55.3187	211.192	180.548	110.085	82.5632	219.571
ENSBTAG00000050790	C3H1orf226	chromosome 3 C1orf226 homolog [Source:NCBI gene;Acc:783439]			-1.70598	-1.27114	2	6.65231	4.34415	6.55519	1.67945	2.02554	5.49599	5.92334	2.74994	2.39409	6.57501
ENSBTAG00000011354	NUDT9	nudix hydrolase 9 [Source:VGNC Symbol;Acc:VGNC:32343]			-1.20419	-1.26726	2	193.632	294.831	200.774	106.748	99.8876	152.693	188.4	106.376	96.4679	184.47
ENSBTAG00000021071	TRIM8	tripartite motif containing 8 [Source:VGNC Symbol;Acc:VGNC:36352]			-1.11879	-1.25336	2	52.381	57.2066	45.6039	26.6451	23.2368	32.7905	28.0195	26.713	20.1761	34.2043
ENSBTAG00000020880	ARMH4	armadillo like helical domain containing 4 [Source:VGNC Symbol;Acc:VGNC:55104]			-1.23085	-1.24662	2	37.003	35.8945	37.2552	18.0288	15.163	33.1433	31.8864	17.3671	16.0239	27.3026
ENSBTAG00000021820	DDX39A	DExD-box helicase 39A [Source:VGNC Symbol;Acc:VGNC:27964]			-1.20189	-1.23363	2	58.4813	51.3092	53.3091	26.0318	23.7687	52.0783	44.7167	26.1961	23.7709	39.8335
ENSBTAG00000020345	CNN3	calponin 3 [Source:NCBI gene;Acc:538975]			-1.03972	-1.23284	2	153.556	224.244	174.029	92.4615	94.8526	138.095	152.965	76.1912	92.8999	146.822
ENSBTAG00000008849	SORT1	sortilin 1 [Source:VGNC Symbol;Acc:VGNC:35133]			-1.42349	-1.22672	2	47.9334	54.5959	38.3602	16.6298	19.8751	34.4534	46.1245	18.7276	24.4064	35.5454
ENSBTAG00000013863	DUSP1	dual specificity phosphatase 1 [Source:VGNC Symbol;Acc:VGNC:28248]			-1.23108	-1.2189	2	74.282	101.042	62.5963	38.9025	31.3874	72.3513	65.4054	40.3013	32.2793	52.2323
ENSBTAG00000048379	0	0			-1.4347	-1.20501	2	9.96531	12.6587	11.467	3.1471	5.96057	7.5952	7.48467	5.42252	4.9691	6.642
ENSBTAG00000003061	LAMA5	laminin subunit alpha 5 [Source:VGNC Symbol;Acc:VGNC:30771]			-1.04232	-1.18011	2	5.53634	4.94564	3.37425	2.42078	2.21069	4.45325	4.15859	2.32404	2.02538	3.24729
ENSBTAG00000045604	TTC9	tetratricopeptide repeat domain 9 [Source:VGNC Symbol;Acc:VGNC:55151]			-1.02977	-1.17941	2	138.581	140.384	110.973	66.522	65.9005	107.401	82.183	64.1751	58.1258	78.124
ENSBTAG00000013745	ITGA5	integrin subunit alpha 5 [Source:VGNC Symbol;Acc:VGNC:30317]			-1.05292	-1.16879	2	35.5481	39.7669	31.9295	16.7161	19.293	29.6498	33.0947	15.6616	18.5031	34.7129
ENSBTAG00000015147	S100A10	S100 calcium binding protein A10 [Source:VGNC Symbol;Acc:VGNC:34237]			-1.01573	-1.16318	2	818.355	1046.37	1026.89	514.764	481.728	545.043	564.168	441.812	473.513	808.229
ENSBTAG00000002688	ATP1B1	ATPase Na+/K+ transporting subunit beta 1 [Source:VGNC Symbol;Acc:VGNC:26285]			-1.25233	-1.15614	2	73.642	99.64	68.1899	30.3409	40.4645	75.8129	75.5342	38.0204	38.3065	76.4116
ENSBTAG00000014059	ATP2B4	ATPase plasma membrane Ca2+ transporting 4 [Source:NCBI gene;Acc:282146]			-1.26865	-1.1545	2	21.6496	24.1549	27.8134	9.71441	11.7263	18.3988	15.8205	10.6479	13.2478	22.4824
ENSBTAG00000021527	IGF1R	insulin like growth factor 1 receptor [Source:VGNC Symbol;Acc:VGNC:30077]			-1.81165	-1.14226	2	16.1509	21.7898	18.4396	5.57919	5.58586	38.2204	29.3634	9.89052	8.38841	26.9516
ENSBTAG00000012626	B4GALT5	beta-1,4-galactosyltransferase 5 [Source:VGNC Symbol;Acc:VGNC:26392]			-1.11759	-1.13844	2	31.0677	49.082	30.7866	17.5254	17.348	28.2528	31.1255	16.8612	18.4951	23.5403
ENSBTAG00000014494	RNASET2	ribonuclease T2 [Source:NCBI gene;Acc:508245]			-1.00627	-1.13402	2	784.141	882.196	908.524	447.332	446.037	597.096	501.17	433.836	402.957	682.678
ENSBTAG00000007390	VAT1	vesicle amine transport 1 [Source:VGNC Symbol;Acc:VGNC:36770]			-1.02419	-1.12723	2	648.406	651.968	548.494	290.82	347.435	352.787	402.813	283.513	329.642	347.047
ENSBTAG00000000699	AOPEP	aminopeptidase O (putative) [Source:NCBI gene;Acc:531757]			-1.20395	-1.12397	2	53.5773	91.9845	52.9215	30.718	27.3134	78.4407	73.7462	34.3248	28.4757	59.38
ENSBTAG00000000830	GPR137B	G protein-coupled receptor 137B [Source:VGNC Symbol;Acc:VGNC:29551]			-1.05274	-1.11006	2	275.428	444.798	351.189	173.187	182.868	232.549	245.54	173.885	178.261	294.311
ENSBTAG00000001537	TSKU	tsukushi, small leucine rich proteoglycan [Source:VGNC Symbol;Acc:VGNC:54896]			-1.50897	-1.10736	2	9.55138	9.23474	11.0028	3.90425	3.40541	16.6509	12.4752	6.11256	3.95806	12.928
ENSBTAG00000021538	MYO1E	myosin IE [Source:VGNC Symbol;Acc:VGNC:31820]			-1.20427	-1.10183	2	168.924	193.611	179.116	86.6889	78.0897	127.689	113.495	97.4759	83.6498	129.127
ENSBTAG00000044129	ST6GALNAC6	ST6 N-acetylgalactosaminide alpha-2,6-sialyltransferase 6 [Source:VGNC Symbol;Acc:VGNC:35342]			-1.04181	-1.09129	2	41.6978	38.5854	33.2283	19.5364	18.8999	25.156	24.2712	19.0782	19.148	29.6448
ENSBTAG00000019177	BIN1	bridging integrator 1 [Source:VGNC Symbol;Acc:VGNC:26497]			-1.21976	-1.0906	2	22.4426	24.5367	28.3189	13.5931	9.34549	17.2935	17.3932	14.5806	10.7697	19.2648
ENSBTAG00000013544	LGALS8	galectin 8 [Source:VGNC Symbol;Acc:VGNC:30855]			-1.00993	-1.08654	2	117.766	177.188	115.781	73.3811	67.3618	87.7875	98.3803	67.6347	69.0316	95.2239
ENSBTAG00000021879	VCL	vinculin [Source:VGNC Symbol;Acc:VGNC:36779]			-1.34425	-1.08612	2	20.151	28.5879	24.2579	11.3432	8.84517	34.4724	27.7022	14.195	10.5826	27.2982
ENSBTAG00000053003	GPX4	glutathione peroxidase 4 [Source:NCBI gene;Acc:286809]			-1.07346	-1.08539	2	711.99	818.362	675.361	331.027	406.945	658.535	659.634	347.361	396.295	618.611
ENSBTAG00000004059	SOAT1	sterol O-acyltransferase 1 [Source:VGNC Symbol;Acc:VGNC:35116]			-1.09674	-1.07886	2	232.246	340.672	369.269	159.353	145.409	199.606	221.046	157.179	158.603	232.814
ENSBTAG00000007581	ADORA2B	adenosine A2b receptor [Source:VGNC Symbol;Acc:VGNC:25688]			-1.34007	-1.07455	2	30.3393	43.7864	45.1004	17.3903	15.209	41.3845	42.8085	21.6975	18.5247	37.116
ENSBTAG00000011137	MORN4	MORN repeat containing 4 [Source:VGNC Symbol;Acc:VGNC:31561]			-1.13196	-1.06311	2	18.6979	20.4246	20.151	9.29665	9.57611	12.4758	13.2366	9.91577	10.3074	19.8011
ENSBTAG00000001656	TMEM254	transmembrane protein 254 [Source:VGNC Symbol;Acc:VGNC:36063]			-1.05804	-1.05744	2	109.062	149.902	118.153	64.549	61.1753	83.9258	87.3536	66.261	62.4699	91.2866
ENSBTAG00000018463	VIM	vimentin [Source:VGNC Symbol;Acc:VGNC:36796]			-1.15862	-1.05181	2	3454.41	2151.34	2893.96	1328.48	1294.23	2249.38	2617	1441.19	1449.98	2411.35
ENSBTAG00000003180	TMEM201	transmembrane protein 201 [Source:VGNC Symbol;Acc:VGNC:36023]			-1.13982	-1.04755	2	11.416	15.7466	10.9669	4.883	7.26708	8.48349	8.72918	6.78398	6.38914	8.29675
ENSBTAG00000011463	MID1IP1	MID1 interacting protein 1 [Source:VGNC Symbol;Acc:VGNC:31465]			-1.28346	-1.03264	2	103.707	91.5623	76.5428	36.3573	41.3733	79.1216	75.5976	48.4855	46.7931	86.8595
ENSBTAG00000012687	INSR	insulin receptor [Source:VGNC Symbol;Acc:VGNC:30221]			-1.48039	-1.03124	2	7.05321	9.93941	10.9796	3.37454	3.54407	9.92346	8.49931	4.85164	4.87799	9.76373
ENSBTAG00000047448	C25H16orf54	chromosome 25 C16orf54 homolog [Source:VGNC Symbol;Acc:VGNC:52686]			-1.10862	-1.02676	2	38.6304	42.7038	39.4083	18.2208	20.8469	38.4311	52.3948	20.7095	21.7484	51.0515
ENSBTAG00000019711	LRMP	lymphoid restricted membrane protein [Source:NCBI gene;Acc:100140494]			1.03658	1.00329	2	16.8783	9.96927	12.0366	31.1167	24.1897	21.5969	17.561	30.0224	24.8859	18.7976
ENSBTAG00000008143	STK17A	serine/threonine kinase 17a [Source:VGNC Symbol;Acc:VGNC:53673]			1.09269	1.00515	2	21.6612	25.4424	23.7137	57.6424	48.2738	33.1212	34.4677	54.55	46.4582	43.7774
ENSBTAG00000005413	NLRC5	NLR family CARD domain containing 5 [Source:VGNC Symbol;Acc:VGNC:32114]			1.4708	1.02803	2	3.80806	3.77021	2.41096	11.0676	8.20992	2.62773	1.71971	8.15003	6.32772	1.90216
ENSBTAG00000011511	0	interferon gamma inducible protein 16 [Source:NCBI gene;Acc:506759]			1.0652	1.03109	2	71.9201	58.5647	61.5764	158.623	124.613	85.9322	98.922	148.131	133.631	78.4993
ENSBTAG00000018523	TRIM38	tripartite motif containing 38 [Source:VGNC Symbol;Acc:VGNC:36333]			1.10284	1.04022	2	33.1472	27.8445	27.4806	73.797	59.5224	33.9702	34.1182	68.7448	60.2972	34.384
ENSBTAG00000039197	SLC2A9	solute carrier family 2 member 9 [Source:VGNC Symbol;Acc:VGNC:34804]			1.32573	1.04919	2	13.513	8.89839	12.7031	32.7031	28.206	9.40591	9.85682	27.2481	24.2872	12.5638
ENSBTAG00000010590	FAM118A	family with sequence similarity 118 member A [Source:VGNC Symbol;Acc:VGNC:28720]			1.08643	1.04938	2	2.85163	1.61532	2.18945	5.27077	4.40313	4.06195	3.62054	5.4736	4.1969	2.97058
ENSBTAG00000015752	SP110	SP110 nuclear body protein [Source:NCBI gene;Acc:515204]			1.02817	1.0513	2	12.3679	7.80404	9.28351	25.632	16.6061	9.76478	9.66575	23.6591	19.2098	12.1072
ENSBTAG00000012829	EBI3	Epstein-Barr virus induced 3 [Source:NCBI gene;Acc:514933]			1.47358	1.05187	2	4.82233	6.54228	7.26831	18.5496	17.2377	3.60207	3.68093	14.5642	12.8746	4.45541
ENSBTAG00000030913	MX1	MX dynamin like GTPase 1 [Source:VGNC Symbol;Acc:VGNC:31770]			1.21812	1.05981	2	6.96942	8.4078	7.2233	21.308	15.9035	3.95775	6.02694	17.866	15.8375	4.88441
ENSBTAG00000019645	TFDP1	transcription factor Dp-1 [Source:NCBI gene;Acc:534579]			1.08377	1.06193	2	1.34271	1.89249	1.75783	3.67006	3.67507	2.50295	2.30148	4.35166	3.12968	1.64975
ENSBTAG00000010002	IRF2	interferon regulatory factor 2 [Source:VGNC Symbol;Acc:VGNC:30271]			1.50121	1.07136	2	3.46342	2.29312	3.4754	9.01453	8.93519	4.23054	5.20443	6.51315	7.25135	4.193
ENSBTAG00000016204	C1RL	complement C1r subcomponent like [Source:VGNC Symbol;Acc:VGNC:26629]			1.22147	1.07738	2	8.57149	6.25635	8.08849	21.1165	16.0875	7.5409	6.07483	20.5541	14.043	8.84926
ENSBTAG00000000639	APRT	adenine phosphoribosyltransferase [Source:VGNC Symbol;Acc:VGNC:26042]			1.47873	1.07976	2	58.3707	39.4645	57.6589	160.779	138.881	43.6175	36.7859	131.365	102.993	48.4756
ENSBTAG00000053223	CTDSPL	CTD small phosphatase like [Source:NCBI gene;Acc:538425]			1.18175	1.09269	2	10.6725	6.01338	5.81416	18.8972	15.7656	7.12211	6.80849	17.2016	16.1956	5.64724
ENSBTAG00000050239	0	caspase 1 [Source:NCBI gene;Acc:514214]			1.30924	1.10421	2	19.1251	16.9253	20.1795	56.3039	41.9222	10.4561	8.59576	46.9551	39.0372	14.9254
ENSBTAG00000019741	C3AR1	complement C3a receptor 1 [Source:VGNC Symbol;Acc:VGNC:26639]			1.2886	1.11111	2	112.236	133.667	113.058	314.961	300.186	62.8788	85.5881	265.924	292.953	81.8845
ENSBTAG00000006748	DMXL1	Dmx like 1 [Source:VGNC Symbol;Acc:VGNC:28117]			1.31369	1.12997	2	2.15081	2.58903	2.36111	6.73459	5.72186	2.47444	3.43369	5.97296	5.25802	3.941
ENSBTAG00000014156	AMN1	antagonist of mitotic exit network 1 homolog [Source:VGNC Symbol;Acc:VGNC:52604]			1.09822	1.15446	2	3.89306	2.26369	2.75425	6.34696	6.79923	3.53763	3.22007	7.77753	6.27903	2.86815
ENSBTAG00000020554	AIF1	allograft inflammatory factor 1 [Source:VGNC Symbol;Acc:VGNC:25759]			1.35538	1.16138	2	418.014	321.01	413.241	1221.48	843.742	317.902	285.887	1017.7	790.366	332.759
ENSBTAG00000047707	BOLA-DOB	major histocompatibility complex, class II, DO beta [Source:NCBI gene;Acc:282493]			1.16788	1.17738	2	7.62114	7.36871	5.21545	19.8642	12.6666	8.26553	9.74995	17.6489	14.8165	5.55598
ENSBTAG00000020848	PIK3CG	phosphatidylinositol-4,5-bisphosphate 3-kinase catalytic subunit gamma [Source:VGNC Symbol;Acc:VGNC:32892]			1.08503	1.20424	2	12.7244	9.27552	9.05165	24.0228	21.9172	21.2967	18.2994	27.7309	23.5703	18.8544
ENSBTAG00000004999	RESF1	retroelement silencing factor 1 [Source:VGNC Symbol;Acc:VGNC:30572]			1.58329	1.21078	2	18.3856	18.0042	11.7264	49.7959	50.0829	11.6175	12.9648	40.4841	38.6154	8.75493
ENSBTAG00000013557	ERAP1	endoplasmic reticulum aminopeptidase 1 [Source:VGNC Symbol;Acc:VGNC:28560]			1.32946	1.21898	2	30.9714	29.9135	21.9521	68.851	76.3074	27.1572	35.2699	62.4314	76.1177	25.1871
ENSBTAG00000006615	CASP7	caspase 7 [Source:VGNC Symbol;Acc:VGNC:26783]			1.27609	1.22337	2	2.02595	1.26286	1.22964	3.91973	3.60752	3.0107	2.58168	4.01939	3.38037	2.3507
ENSBTAG00000033690	BARD1	BRCA1 associated RING domain 1 [Source:VGNC Symbol;Acc:VGNC:26420]			1.10586	1.2285	2	5.39275	3.11317	5.11182	11.0379	9.08728	9.63963	7.42282	12.9198	9.60893	7.24526
ENSBTAG00000020611	GLB1L	galactosidase beta 1 like [Source:VGNC Symbol;Acc:VGNC:29392]			1.36494	1.22857	2	2.31608	1.68847	2.14499	6.35158	4.80803	2.91059	2.15973	5.55611	4.73062	2.34579
ENSBTAG00000000988	BRCA2	BRCA2 DNA repair associated [Source:VGNC Symbol;Acc:VGNC:26554]			1.2179	1.2371	2	4.10049	3.40033	5.09648	11.7247	8.83014	7.95162	6.22317	12.223	9.10899	9.66964
ENSBTAG00000012335	UBA7	ubiquitin like modifier activating enzyme 7 [Source:VGNC Symbol;Acc:VGNC:36566]			1.6351	1.24659	2	13.8289	12.255	12.2902	52.718	33.2825	6.51041	6.13326	37.4488	28.97	9.41984
ENSBTAG00000008142	IFIH1	interferon induced with helicase C domain 1 [Source:VGNC Symbol;Acc:VGNC:30048]			1.32159	1.25681	2	16.0912	12.9471	11.8956	46.4239	27.6287	13.9308	15.3406	39.9167	30.5593	13.0752
ENSBTAG00000054326	WDR5B	WD repeat domain 5B [Source:NCBI gene;Acc:100138335]			1.36584	1.2574	2	9.75496	6.38601	4.45645	15.1868	21.0412	8.05534	8.70754	15.3158	19.3271	7.27925
ENSBTAG00000032289	ARHGAP15	Rho GTPase activating protein 15 [Source:VGNC Symbol;Acc:VGNC:26076]			1.20557	1.2585	2	23.896	11.3288	15.2892	37.8308	40.4797	20.7828	20.829	42.2856	40.7804	19.5919
ENSBTAG00000024851	TRIM14	tripartite motif containing 14 [Source:VGNC Symbol;Acc:VGNC:36315]			1.08151	1.26109	2	6.04153	3.61686	6.49299	11.6611	11.5676	9.30756	9.27462	13.6286	13.4544	9.60898
ENSBTAG00000017824	IRF8	interferon regulatory factor 8 [Source:VGNC Symbol;Acc:VGNC:30279]			1.3437	1.26502	2	45.3783	19.1206	23.6987	74.0109	72.4204	23.6641	19.7045	73.6221	68.7008	21.5
ENSBTAG00000002002	ATAD2	ATPase family AAA domain containing 2 [Source:VGNC Symbol;Acc:VGNC:26233]			1.35662	1.27444	2	8.86149	6.65816	7.25687	21.778	19.175	11.428	11.9935	21.3492	18.3461	15.6704
ENSBTAG00000012066	PECAM1	platelet and endothelial cell adhesion molecule 1 [Source:VGNC Symbol;Acc:VGNC:32737]			1.49009	1.29738	2	1.58897	1.25281	1.44847	3.79312	4.67308	2.26247	1.84289	3.33384	4.32534	2.05782
ENSBTAG00000033731	PRCP	prolylcarboxypeptidase [Source:VGNC Symbol;Acc:VGNC:33287]			1.42307	1.30363	2	37.8578	33.8678	36.1289	110.812	93.1725	24.1749	24.5809	98.8693	92.9994	29.7024
ENSBTAG00000018430	GSAP	gamma-secretase activating protein [Source:VGNC Symbol;Acc:VGNC:29671]			1.20666	1.30499	2	7.415	4.45538	6.01887	13.8213	14.6024	7.16566	11.1816	15.1986	15.953	6.82615
ENSBTAG00000004558	C10H15orf48	chromosome 10 C15orf48 homolog [Source:VGNC Symbol;Acc:VGNC:52612]			1.61326	1.30513	2	59.4442	41.7152	51.2916	189.663	137.355	79.6119	58.5743	155.308	111.049	62.4459
ENSBTAG00000015107	SLC16A1	solute carrier family 16 member 1 [Source:VGNC Symbol;Acc:VGNC:34683]			1.41041	1.31191	2	45.5223	35.742	45.3785	149.846	92.5621	67.7119	69.4296	138.408	92.2429	57.9696
ENSBTAG00000006078	0	interleukin 15 receptor subunit alpha [Source:NCBI gene;Acc:615030]			1.64113	1.31378	2	8.0055	4.09759	7.55939	23.9524	17.7981	5.34597	4.35264	20.0361	14.0164	6.4606
ENSBTAG00000053766	0	cytochrome P450 2J2-like [Source:NCBI gene;Acc:107132327]			1.35196	1.31708	2	4.71684	3.13232	2.34274	10.1525	7.65752	4.41013	4.18134	9.71523	7.9137	2.59458
ENSBTAG00000003038	TAP2	transporter 2, ATP binding cassette subfamily B member [Source:NCBI gene;Acc:281586]			1.94674	1.32514	2	3.51702	3.60212	5.2203	16.6002	15.961	7.69917	6.65798	9.46293	12.5767	8.22376
ENSBTAG00000009768	IFIT3	interferon induced protein with tetratricopeptide repeats 3 [Source:VGNC Symbol;Acc:VGNC:30050]			1.69034	1.34003	2	14.363	9.23374	10.2781	48.34	29.5613	6.49255	7.08711	33.8432	26.9513	8.86373
ENSBTAG00000009055	RNF144B	ring finger protein 144B [Source:VGNC Symbol;Acc:VGNC:34027]			1.03717	1.38259	2	3.59365	2.73387	3.64403	7.70083	6.62297	7.34697	8.37866	10.4126	8.31361	5.51903
ENSBTAG00000047495	CD81	CD81 molecule [Source:VGNC Symbol;Acc:VGNC:50034]			1.42383	1.39617	2	128.391	97.0816	77.0411	276.15	281.917	260.301	204.773	300.508	263.781	112.394
ENSBTAG00000031355	0	C-C chemokine receptor type 1-like [Source:NCBI gene;Acc:529196]			1.69942	1.40393	2	5.42626	3.97304	4.58305	18.3368	13.6604	4.34012	4.67997	14.5168	11.9832	4.56796
ENSBTAG00000016042	TM6SF2	transmembrane 6 superfamily member 2 [Source:VGNC Symbol;Acc:VGNC:35909]			1.84107	1.40861	2	4.20268	6.74853	5.58134	20.646	20.283	5.47022	5.82687	15.4214	15.8954	4.98005
ENSBTAG00000006951	LMO2	LIM domain only 2 [Source:VGNC Symbol;Acc:VGNC:30934]			1.68479	1.41668	2	36.1887	15.3647	16.3036	74.8149	66.1871	15.122	13.0656	62.7061	57.4843	11.0575
ENSBTAG00000001824	SLC2A6	solute carrier family 2 member 6 [Source:VGNC Symbol;Acc:VGNC:34802]			1.67463	1.41866	2	7.15114	4.97726	3.9164	18.5447	16.3999	5.13535	3.22591	18.5226	12.079	4.59218
ENSBTAG00000000240	AKAP7	A-kinase anchoring protein 7 [Source:VGNC Symbol;Acc:VGNC:25788]			1.75275	1.4196	2	3.4914	2.10431	2.53688	10.9174	8.24739	4.41498	3.42689	8.44061	6.9524	3.69735
ENSBTAG00000006645	LPAR6	lysophosphatidic acid receptor 6 [Source:VGNC Symbol;Acc:VGNC:30960]			1.78154	1.43582	2	8.6438	9.63955	10.4286	37.6728	31.7107	5.04599	6.61245	28.0158	27.8447	10.1135
ENSBTAG00000005251	0	tripartite motif-containing protein 5 [Source:NCBI gene;Acc:516599]			1.8001	1.47044	2	4.18416	3.20075	3.61349	15.238	11.8369	3.53759	3.73249	12.9002	9.15565	3.01475
ENSBTAG00000008165	ITGA2B	integrin subunit alpha 2b [Source:VGNC Symbol;Acc:VGNC:30314]			1.8252	1.48856	2	6.95021	3.81438	3.12253	16.4567	16.17	2.45996	2.30781	13.659	12.9534	2.32374
ENSBTAG00000000181	SUSD3	sushi domain containing 3 [Source:VGNC Symbol;Acc:VGNC:35488]			1.82175	1.49747	2	6.96769	5.82698	6.9595	19.7981	29.9113	7.26092	11.2517	17.7352	22.842	9.87394
ENSBTAG00000002416	0	guanylate-binding protein 4-like [Source:NCBI gene;Acc:783604]			1.70288	1.51447	2	5.90208	2.94528	3.46016	15.9549	11.5093	4.57424	3.60867	13.3566	10.8679	5.16424
ENSBTAG00000011572	TSPYL5	TSPY like 5 [Source:NCBI gene;Acc:615997]			1.65461	1.53554	2	1.43035	1.51813	1.31498	5.43773	4.04874	2.68714	2.79573	4.65719	4.16523	1.18943
ENSBTAG00000003063	SYNJ1	synaptojanin 1 [Source:VGNC Symbol;Acc:VGNC:35527]			1.10666	1.56067	2	12.0024	8.34439	5.52904	21.002	16.5303	9.90553	12.1193	28.6077	23.7736	10.5288
ENSBTAG00000022681	EOGT	EGF domain specific O-linked N-acetylglucosamine transferase [Source:VGNC Symbol;Acc:VGNC:28515]			1.72289	1.56716	2	4.62499	3.13747	2.50517	11.7025	11.5697	5.54749	5.49334	10.6457	10.8664	3.57343
ENSBTAG00000034918	IFIT2	interferon induced protein with tetratricopeptide repeats 2 [Source:VGNC Symbol;Acc:VGNC:30049]			1.93032	1.56733	2	11.9695	10.5204	8.82122	56.9943	30.4383	6.87243	6.75197	42.2709	25.6988	7.87864
ENSBTAG00000019054	EPSTI1	epithelial stromal interaction 1 [Source:VGNC Symbol;Acc:VGNC:28557]			1.64758	1.58255	2	50.8477	26.4654	33.919	137.784	101.092	29.801	33.3366	124.556	106.952	34.6814
ENSBTAG00000020887	CACNA1E	calcium voltage-gated channel subunit alpha1 E [Source:VGNC Symbol;Acc:VGNC:26675]			1.82183	1.60219	2	0.104879	0.0709434	0.0580268	0.275543	0.295573	0.0677864	0.0332063	0.273535	0.230178	0.0314982
ENSBTAG00000007450	C2	complement C2 [Source:VGNC Symbol;Acc:VGNC:53959]			1.7596	1.61849	2	79.54	61.6611	40.6808	191.062	227.8	39.8896	57.5099	167.638	224.502	32.6344
ENSBTAG00000003039	PSMB8	proteasome 20S subunit beta 8 [Source:VGNC Symbol;Acc:VGNC:33452]			1.82113	1.6251	2	135.308	96.1161	100.425	425.11	383.286	146.927	134.537	378.693	342.094	109.263
ENSBTAG00000011467	BATF2	basic leucine zipper ATF-like transcription factor 2 [Source:VGNC Symbol;Acc:VGNC:26426]			2.04437	1.62786	2	7.1901	4.84685	5.11245	28.8084	20.5519	3.89677	4.00927	22.3822	15.4863	3.75211
ENSBTAG00000026148	0	adhesion G protein-coupled receptor E2-like [Source:NCBI gene;Acc:100300051]			1.64243	1.6417	2	1.01083	0.384589	0.385505	2.04928	1.53102	0.90468	0.717063	1.9466	1.67906	0.91208
ENSBTAG00000022520	BRCA1	BRCA1 DNA repair associated [Source:VGNC Symbol;Acc:VGNC:55781]			1.61173	1.65162	2	3.07031	1.81676	2.927	9.90156	6.76372	2.66846	1.13833	9.0343	8.06689	2.66629
ENSBTAG00000004971	GRAMD1C	GRAM domain containing 1C [Source:VGNC Symbol;Acc:VGNC:29624]			1.93341	1.66225	2	1.52552	0.834599	1.26286	5.50816	4.06809	1.87224	1.28006	5.23066	2.99244	1.86125
ENSBTAG00000025471	TNF	tumor necrosis factor [Source:VGNC Symbol;Acc:VGNC:36153]			2.00227	1.69149	2	1.39828	1.54929	0.925704	6.64068	4.30352	0.833826	0.554251	5.53599	3.43444	1.09025
ENSBTAG00000002773	0	CD300 molecule like family member f [Source:NCBI gene;Acc:101905619]			2.14346	1.69307	2	7.1295	2.30515	3.88364	20.8132	16.491	4.33011	2.1949	15.4172	12.4348	4.50676
ENSBTAG00000016462	TCF4	transcription factor 4 [Source:VGNC Symbol;Acc:VGNC:35694]			1.42711	1.70332	2	1.49621	1.07077	1.22688	4.07057	3.12781	3.75545	2.26432	4.11236	4.77182	1.67526
ENSBTAG00000014707	ISG15	ISG15 ubiquitin like modifier [Source:VGNC Symbol;Acc:VGNC:30293]			2.04614	1.71845	2	44.6737	43.6049	32.6367	228.631	133.161	18.5488	27.1737	154.398	131.448	19.0494
ENSBTAG00000032265	RTP4	receptor transporter protein 4 [Source:VGNC Symbol;Acc:VGNC:53603]			1.96635	1.73209	2	7.46803	3.66885	5.2116	27.1741	17.1635	3.30118	3.11821	20.809	16.9365	3.6499
ENSBTAG00000012208	0	MHC class I heavy chain [Source:NCBI gene;Acc:507917]			1.94016	1.73706	2	11.733	9.82354	4.78465	30.0111	37.0777	9.86222	14.6719	27.2962	32.2105	7.45803
ENSBTAG00000014365	0	adhesion G protein-coupled receptor E2-like [Source:NCBI gene;Acc:112447333]			1.72255	1.73831	2	1.61203	1.09301	0.907929	5.11789	3.35058	1.95577	1.74297	4.78957	3.80419	2.87395
ENSBTAG00000006256	PTPRO	protein tyrosine phosphatase receptor type O [Source:VGNC Symbol;Acc:VGNC:33555]			1.56065	1.74453	2	8.71546	4.39638	5.74192	22.1306	16.1092	11.1751	13.397	23.4468	20.5216	7.40274
ENSBTAG00000006360	CD180	CD180 molecule [Source:VGNC Symbol;Acc:VGNC:52748]			2.10515	1.76508	2	19.4027	25.7521	33.2161	134.089	98.8909	9.11205	9.37864	101.185	86.0399	26.7367
ENSBTAG00000011349	CDH24	cadherin 24 [Source:VGNC Symbol;Acc:VGNC:27101]			1.75535	1.77835	2	0.333539	0.307214	0.205688	0.79464	1.21894	0.830774	0.588318	0.995582	1.08464	0.591653
ENSBTAG00000012330	B2M	beta-2-microglobulin [Source:NCBI gene;Acc:783680]			1.97947	1.81959	2	2891.64	2398.72	1502.19	9408.58	8729.57	3092.37	2717.29	8409.51	8278.02	1664.16
ENSBTAG00000020736	CD40	CD40 molecule [Source:VGNC Symbol;Acc:VGNC:27033]			1.90738	1.8625	2	45.3071	18.2512	19.0443	109.915	89.7251	39.9775	32.3384	111.971	86.8403	26.7038
ENSBTAG00000014628	OAS2	2'-5'-oligoadenylate synthetase 2 [Source:VGNC Symbol;Acc:VGNC:32391]			2.12136	1.86319	2	6.35947	8.14808	5.23012	31.6718	28.1699	2.23386	5.17189	22.4376	29.1345	2.86893
ENSBTAG00000013569	CD38	CD38 molecule [Source:VGNC Symbol;Acc:VGNC:27027]			2.04407	1.86579	2	1.46247	0.830914	1.99698	5.75085	5.86155	1.63636	1.95743	5.52739	4.96984	3.36281
ENSBTAG00000020536	HERC6	HECT and RLD domain containing E3 ubiquitin protein ligase family member 6 [Source:VGNC Symbol;Acc:VGNC:29815]			1.94394	1.87182	2	3.63906	3.78909	3.57793	22.8175	9.79565	5.75627	4.63558	18.0459	11.5383	4.54957
ENSBTAG00000018040	PSMB10	proteasome 20S subunit beta 10 [Source:NCBI gene;Acc:282328]			2.23191	1.92663	2	48.8658	24.4712	39.3798	186.989	170.024	43.0993	38.3802	164.092	132.294	37.2179
ENSBTAG00000018994	TNFSF10	TNF superfamily member 10 [Source:VGNC Symbol;Acc:VGNC:36172]			2.17934	1.96255	2	7.26365	4.7635	7.2191	42.2914	21.5591	2.47831	2.50117	33.7145	20.1304	5.19308
ENSBTAG00000018975	KCNT1	potassium sodium-activated channel subfamily T member 1 [Source:VGNC Symbol;Acc:VGNC:30494]			2.39041	1.97781	2	2.80262	2.49699	2.33175	11.5121	17.0377	1.3017	1.32459	8.6561	13.6566	1.06476
ENSBTAG00000012406	ZBP1	Z-DNA binding protein 1 [Source:VGNC Symbol;Acc:VGNC:37056]			2.21207	2.03717	2	4.77263	5.48063	2.97411	24.8441	17.5922	3.18802	2.88135	19.8405	18.1555	2.14924
ENSBTAG00000011192	GPR87	G protein-coupled receptor 87 [Source:VGNC Symbol;Acc:VGNC:29603]			2.12829	2.06929	2	1.37216	1.80905	0.920219	6.00915	6.35405	1.18175	2.13071	5.49871	6.85019	0.817666
ENSBTAG00000018130	MAP2	microtubule associated protein 2 [Source:VGNC Symbol;Acc:VGNC:31182]			1.98373	2.07401	2	1.53105	0.465129	1.22784	4.93645	3.2171	2.51655	1.56928	5.15494	3.62545	1.6942
ENSBTAG00000017313	ADA2	adenosine deaminase 2 [Source:VGNC Symbol;Acc:VGNC:54400]			2.25372	2.07844	2	9.42303	4.88352	4.57492	29.6568	30.1966	3.39185	4.67553	26.7594	27.4455	3.03311
ENSBTAG00000052306	IFITM3	interferon induced transmembrane protein 3 [Source:NCBI gene;Acc:777594]			2.27513	2.09412	2	1.18139	0.785864	1.71534	6.4186	5.4114	0.534568	0.921615	5.35068	5.27667	1.44478
ENSBTAG00000009206	FOXS1	forkhead box S1 [Source:VGNC Symbol;Acc:VGNC:29108]			2.56159	2.13017	2	0.46806	0.245619	0.215811	2.04257	1.69876	0.187733	0.154354	1.90731	1.03409	0.118643
ENSBTAG00000013167	SIGLEC1	sialic acid binding Ig like lectin 1 [Source:VGNC Symbol;Acc:VGNC:34617]			2.44467	2.14044	2	5.89081	1.52052	1.49819	13.4168	14.0021	0.975816	1.00578	10.5192	12.4644	0.803336
ENSBTAG00000007881	IFIT1	interferon-induced protein with tetratricopeptide repeats 1 [Source:NCBI gene;Acc:100139670]			2.20716	2.16959	2	84.829	44.6988	23.7543	316.418	152.523	99.1494	136.172	276.132	172.05	69.7922
ENSBTAG00000019017	0	interferon-induced transmembrane protein 1-like [Source:NCBI gene;Acc:112444847]			2.41996	2.17539	2	7.36189	4.98474	6.14561	41.8226	28.4904	5.09832	4.97955	31.0326	28.7419	3.49414
ENSBTAG00000014042	TLR10	toll like receptor 10 [Source:VGNC Symbol;Acc:VGNC:50019]			2.61991	2.2383	2	4.23484	0.748307	2.34003	13.0197	12.3392	1.37277	1.03408	10.4006	9.57593	2.09334
ENSBTAG00000019979	CMPK2	cytidine/uridine monophosphate kinase 2 [Source:VGNC Symbol;Acc:VGNC:27481]			2.35048	2.2632	2	0.801522	0.408713	0.492574	4.47743	1.94597	0.188165	0.24079	3.90752	1.99723	0.227664
ENSBTAG00000005146	0	0			2.40353	2.31007	2	127.178	105.725	66.1172	454.384	641.566	103.802	100.631	462.026	575.483	67.9066
ENSBTAG00000008953	TAP1	transporter 1, ATP binding cassette subfamily B member [Source:VGNC Symbol;Acc:VGNC:35598]			2.56381	2.35709	2	16.6525	11.0136	6.8622	74.2105	61.1331	22.2339	22.5294	65.5649	54.5091	10.0314
ENSBTAG00000038625	0	guanylate-binding protein 6 [Source:NCBI gene;Acc:513659]			2.48956	2.40745	2	12.0886	8.71194	12.4377	72.4889	57.8104	21.511	25.4534	62.5112	61.9063	19.9923
ENSBTAG00000019386	BOLA-NC1	non-classical MHC class I antigen [Source:NCBI gene;Acc:510417]			2.58384	2.44997	2	223.884	113.446	74.2116	795.845	771.902	144.638	108.351	710.265	745.172	82.6297
ENSBTAG00000017514	CCND1	cyclin D1 [Source:VGNC Symbol;Acc:VGNC:26962]			2.91625	2.47311	2	7.29412	1.86102	3.82225	26.4431	32.9784	0.957597	0.62433	21.3963	23.3913	1.46912
ENSBTAG00000051439	0	0			2.47294	2.48369	2	0.0852807	0.0908259	0.049325	0.412026	0.478652	0.114555	0.0752799	0.443889	0.485106	0.0413972
ENSBTAG00000049961	0	adhesion G protein-coupled receptor E2 [Source:NCBI gene;Acc:100337213]			2.50521	2.48939	2	17.8042	5.32563	7.23021	59.5318	47.1682	4.36553	4.93284	54.5311	52.5971	5.77526
ENSBTAG00000017670	0	guanylate-binding protein 1 [Source:NCBI gene;Acc:511531]			2.76488	2.49249	2	6.50199	7.40773	6.31352	59.9212	38.8471	9.20604	11.1014	44.1487	37.3942	8.37526
ENSBTAG00000031231	IRF1	interferon regulatory factor 1 [Source:VGNC Symbol;Acc:VGNC:30270]			2.80968	2.51073	2	19.8539	10.7549	13.5679	119.901	92.9137	11.801	15.2965	97.066	80.2917	13.6104
ENSBTAG00000006490	BOLA-DOA	major histocompatibility complex, class II, DO alpha [Source:NCBI gene;Acc:525727]			2.71431	2.52897	2	4.52712	3.65701	2.84614	27.6	22.8648	3.22761	3.6215	24.167	21.3069	3.4156
ENSBTAG00000008471	MX2	MX dynamin like GTPase 2 [Source:VGNC Symbol;Acc:VGNC:50221]			2.69982	2.55121	2	27.2513	10.5272	19.0816	193.498	75.2494	11.4151	8.36281	152.905	81.1237	11.8861
ENSBTAG00000010852	0	butyrophilin subfamily 2 member A2 [Source:NCBI gene;Acc:107131749]			2.79372	2.56312	2	0.69049	0.289294	0.398478	3.47215	2.9957	0.390527	0.353949	3.01483	2.60216	0.797733
ENSBTAG00000036224	MGC157082	uncharacterized LOC788038 [Source:NCBI gene;Acc:788038]			2.75792	2.57654	2	1.68433	0.459879	0.812715	6.07425	6.22099	1.03691	0.999394	5.36024	5.77841	1.33793
ENSBTAG00000008954	PSMB9	proteasome subunit beta 9 [Source:VGNC Symbol;Acc:VGNC:33453]			2.91711	2.63706	2	24.8261	11.5097	15.5653	147.231	115.84	36.1484	35.8857	119.203	99.5606	22.0183
ENSBTAG00000016061	RSAD2	radical S-adenosyl methionine domain containing 2 [Source:VGNC Symbol;Acc:VGNC:34176]			2.94446	2.6537	2	4.12058	2.95231	2.58608	32.8435	20.0765	1.53785	1.84712	25.0802	18.2563	1.60671
ENSBTAG00000015060	GBP5	guanylate binding protein 5 [Source:VGNC Symbol;Acc:VGNC:59183]			2.94863	2.69638	2	3.2218	0.669452	1.12139	12.9957	9.39658	4.4315	2.32997	11.2626	7.84762	1.67662
ENSBTAG00000014529	GBP4	guanylate binding protein 4 [Source:NCBI gene;Acc:613313]			2.95244	2.69905	2	1.77242	1.75157	1.78927	15.7845	13.2718	1.06419	2.09563	12.0301	12.8303	2.33687
ENSBTAG00000031444	LY86	lymphocyte antigen 86 [Source:VGNC Symbol;Acc:VGNC:31093]			2.92648	2.71672	2	15.5431	2.43344	10.4704	60.7588	55.7354	4.08178	3.66772	49.9767	52.621	7.64964
ENSBTAG00000038233	0	guanylate-binding protein 4 [Source:NCBI gene;Acc:507055]			3.08877	2.73765	2	12.6994	6.14191	8.55609	108.86	56.6256	8.81505	6.42134	78.8742	49.9112	10.5066
ENSBTAG00000008556	POU2F2	POU class 2 homeobox 2 [Source:VGNC Symbol;Acc:VGNC:59358]			2.68358	2.74227	2	0.549966	0.22819	0.369775	2.77641	2.1839	0.571773	0.411989	3.46403	1.94547	0.208411
ENSBTAG00000006608	GGT5	gamma-glutamyltransferase 5 [Source:VGNC Symbol;Acc:VGNC:29344]			3.10742	2.78373	2	0.0708745	0.163676	0.0404952	0.73585	0.74727	0.332348	0.323685	0.768401	0.472804	0.297584
ENSBTAG00000000559	PLTP	phospholipid transfer protein [Source:VGNC Symbol;Acc:VGNC:33055]			2.98851	2.8067	2	25.179	14.4586	10.0111	167.794	98.1062	20.9625	10.0794	165.188	81.2767	10.1741
ENSBTAG00000009849	PLAC8	placenta-specific 8 [Source:NCBI gene;Acc:509228]			3.38743	2.85367	2	13.4342	4.68072	4.37273	99.1969	53.5254	1.64607	1.73962	64.9452	40.421	3.75288
ENSBTAG00000018009	0	0			3.35834	2.87383	2	0.146803	0.0924321	0.323756	2.14878	1.64754	0.202326	0.424462	1.60915	1.12911	0.240617
ENSBTAG00000031750	PLAC8B	placenta specific 8 B [Source:VGNC Symbol;Acc:VGNC:56782]			3.44544	2.89284	2	30.9623	20.7827	40.2143	449.723	254.145	12.9844	16.3465	272.101	204.483	37.1248
ENSBTAG00000017280	C3	complement C3 [Source:VGNC Symbol;Acc:VGNC:26638]			2.86631	2.89619	2	9.68891	3.71479	2.97551	39.8825	33.8538	7.55875	7.13751	44.1543	33.552	3.4724
ENSBTAG00000051768	0	0			2.88794	2.89974	2	13.4598	10.0551	9.79346	123.424	61.0471	21.1655	25.8247	108.602	71.1875	16.7943
ENSBTAG00000003326	NAIP	NLR family apoptosis inhibitory protein [Source:VGNC Symbol;Acc:VGNC:31873]			3.04555	2.94427	2	12.7787	8.86451	7.80691	112.083	63.274	18.5489	22.1925	106.401	60.3602	14.021
ENSBTAG00000037937	0	interferon-induced very large GTPase 1-like [Source:NCBI gene;Acc:101903126]			3.28116	3.00322	2	5.19713	8.75498	1.70226	38.5155	50.8646	4.57527	10.6505	33.4507	41.7884	2.38136
ENSBTAG00000000271	MNS1	meiosis specific nuclear structural 1 [Source:VGNC Symbol;Acc:VGNC:31539]			3.35908	3.09745	2	0.553824	0.333341	0.184217	5.10606	2.5911	0.934212	1.62123	4.38934	2.08318	1.24843
ENSBTAG00000012451	BOLA-DMB	major histocompatibility complex, class II, DM beta [Source:NCBI gene;Acc:282491]			3.47349	3.11216	2	102.783	33.9305	49.9397	724.049	590.068	36.0106	35.5508	565.588	478.808	33.7865
ENSBTAG00000011936	ATP8B4	ATPase phospholipid transporting 8B4 (putative) [Source:NCBI gene;Acc:100137953]			3.95878	3.1529	2	0.153162	0.51223	0.614271	6.24351	5.74863	1.19709	1.32235	3.21127	3.89545	2.286
ENSBTAG00000007075	0	major histocompatibility complex, class I, A-like [Source:NCBI gene;Acc:616942]			3.29083	3.17498	2	16.7907	26.9748	6.43634	108.636	204.847	16.3781	26.2921	105.967	188.585	7.36513
ENSBTAG00000038938	GBP2	guanylate-binding protein 2 [Source:NCBI gene;Acc:781710]			3.703	3.42903	2	3.56333	4.9806	4.2541	78.7373	42.5627	2.0042	6.55084	58.4934	40.366	5.25996
ENSBTAG00000050417	0	apolipoprotein L3 [Source:NCBI gene;Acc:788334]			3.89479	3.63864	2	11.3862	0.876107	2.56734	75.7504	28.2344	1.95029	0.648581	56.581	27.3985	1.17124
ENSBTAG00000020649	CIITA	class II major histocompatibility complex transactivator [Source:VGNC Symbol;Acc:VGNC:27366]			3.95632	3.75282	2	4.08328	0.788873	2.13429	34.2418	27.8658	3.00208	3.48808	30.877	24.4505	3.06482
ENSBTAG00000015730	BOLA-DMA	major histocompatibility complex, class II, DM alpha [Source:NCBI gene;Acc:282490]			4.08876	3.76816	2	33.0559	10.2569	15.0246	307.092	309.493	10.2183	16.4726	253.007	251.736	10.2194
ENSBTAG00000011409	CD72	CD72 molecule [Source:VGNC Symbol;Acc:VGNC:27045]			3.95758	3.79994	2	0.821237	0.594188	0.156383	6.43451	7.78611	0.405422	0.659161	6.65092	6.40688	0.198435
ENSBTAG00000015727	IFI47	interferon gamma inducible protein 47 [Source:NCBI gene;Acc:521987]			4.48522	3.84731	2	0.0426681	0.0272424	0.0273008	0.877446	0.934255	0	0	0.452611	0.798329	0.0141322
ENSBTAG00000019588	BLA-DQB	MHC class II antigen [Source:NCBI gene;Acc:539241]			3.98591	3.85798	2	211.7	69.6729	95.6602	1597.77	2166.45	293.027	232.071	1492.97	2021.83	181.488
ENSBTAG00000050536	0	0			4.3554	3.87638	2	0.0611234	0.346708	0.389016	3.35529	6.40113	0.140988	0.478182	2.73804	4.35307	0.451651
ENSBTAG00000014953	0	cationic amino acid transporter 3-like [Source:NCBI gene;Acc:104968422]			3.75022	3.95878	2	0.563147	0.184529	0.137994	3.47566	3.61791	1.27885	1.18266	4.14906	4.24609	0.548015
ENSBTAG00000020080	MYBPC2	myosin binding protein C, fast type [Source:VGNC Symbol;Acc:VGNC:57354]			4.02214	3.97178	2	0.0277523	0.00441451	0	0.142163	0.117361	0	0	0.160666	0.0991187	0
ENSBTAG00000018125	KIF5C	kinesin family member 5C [Source:VGNC Symbol;Acc:VGNC:30607]			4.36427	4.10086	2	0.0636785	0.0164279	0.0162824	0.844467	0.469496	0.0481338	0.0310874	0.661784	0.419836	0.0165356
ENSBTAG00000006549	CALHM6	calcium homeostasis modulator family member 6 [Source:VGNC Symbol;Acc:VGNC:26712]			4.6432	4.16899	2	9.37157	1.26819	5.46686	140.003	79.1711	15.9219	7.4038	103.669	57.7436	14.9579
ENSBTAG00000013919	0	major histocompatibility complex, class II, DRB3 [Source:NCBI gene;Acc:282530]			4.34022	4.17844	2	238.146	74.3003	148.214	2796.84	3113.28	172.22	283.558	2496.88	2911.62	182.306
ENSBTAG00000015228	CD74	CD74 molecule [Source:VGNC Symbol;Acc:VGNC:52227]			4.43032	4.28521	2	569.975	123.532	251.94	5988.58	5797.38	464.437	617.733	5417.76	5480.53	411.403
ENSBTAG00000038397	0	histocompatibility complex, class II, DR beta 2 [Source:NCBI gene;Acc:538700]			4.7328	4.42271	2	11.638	2.34204	1.96848	101.359	112.596	5.17326	10.5343	78.8415	97.7513	2.95569
ENSBTAG00000022395	0	serum amyloid A protein [Source:NCBI gene;Acc:104968478]			4.74486	4.47942	2	0	0.0467649	0.0698684	1.02627	1.12541	0.0761009	0	0.890831	0.940799	0.0230025
ENSBTAG00000021943	NFYC	nuclear transcription factor Y subunit gamma [Source:VGNC Symbol;Acc:VGNC:32057]			5.31082	4.48279	2	0	0	0	0.295485	0.197948	0	0	0.186888	0.095866	0
ENSBTAG00000010645	BOLA-DRA	major histocompatibility complex, class II, DR alpha [Source:NCBI gene;Acc:506214]			4.74743	4.58885	2	266.23	77.5261	118.782	3867.57	3787.77	194.394	405.208	3352.51	3686.1	215.169
ENSBTAG00000010954	ART3	ADP-ribosyltransferase 3 [Source:VGNC Symbol;Acc:VGNC:26180]			4.15118	5.37273	2	0	0	0	0.199955	0.150341	0	0	0.513602	0.345182	0
ENSBTAG00000005807	MICU1	mitochondrial calcium uptake 1 [Source:VGNC Symbol;Acc:VGNC:31461]			6.03345	5.51843	2	0	0	0	0.253554	0.41422	0	0	0.11609	0.498448	0
ENSBTAG00000008952	RAP1GAP	RAP1 GTPase activating protein [Source:VGNC Symbol;Acc:VGNC:33716]			5.49776	5.52421	2	0	0	0	0.163751	0.0912954	0	0	0.176264	0.0879803	0
ENSBTAG00000001725	CXCL10	C-X-C motif chemokine ligand 10 [Source:VGNC Symbol;Acc:VGNC:27846]			5.80487	5.54353	2	2.12318	1.19677	1.30834	152.827	51.9584	1.10791	0.439269	123.135	46.3483	0.474626
ENSBTAG00000049589	SAA3	serum amyloid A 3 [Source:NCBI gene;Acc:281474]			6.14268	5.91798	2	1.12596	2.83539	0.614281	90.9298	101.406	1.99312	2.28216	93.4341	74.9356	2.10879
ENSBTAG00000004215	RARRES2	retinoic acid receptor responder 2 [Source:VGNC Symbol;Acc:VGNC:33732]			6.45863	6.06174	2	0.102371	0	0.0223037	3.86226	2.638	0.138632	0.128837	2.99726	1.92626	0.0429399
ENSBTAG00000005603	CXCL11	C-X-C motif chemokine ligand 11 [Source:VGNC Symbol;Acc:VGNC:27847]			6.58577	6.33295	2	0.0855835	0.227078	0.0566773	17.5958	8.76962	0	0	16.3207	6.61337	0
ENSBTAG00000038878	AOX4	aldehyde oxidase 1-like [Source:NCBI gene;Acc:518393]			6.08933	6.3437	2	0	0	0	0.194946	0.176762	0	0	0.175857	0.306343	0
ENSBTAG00000015241	EPHX2	epoxide hydrolase 2 [Source:VGNC Symbol;Acc:VGNC:28542]			6.51742	6.35026	2	0.237685	0.0198181	0.0295718	8.50406	3.90968	0.174645	0.0901646	7.11644	3.73332	0.0301797
ENSBTAG00000010351	SNX25	sorting nexin 25 [Source:VGNC Symbol;Acc:VGNC:35104]			6.40378	6.73264	2	0	1.13e-09	0	0.518884	0.241724	0	0	0.732921	0.262673	0
ENSBTAG00000023064	CCDC187	coiled-coil domain containing 187 [Source:HGNC Symbol;Acc:HGNC:30942]			7.57345	7.29754	2	0	0	0	0.746503	0.393437	0	0.00604613	0.567517	0.359193	0
ENSBTAG00000054278	M-SAA3.2	mammary serum amyloid A3.2 [Source:NCBI gene;Acc:618238]			7.65137	7.44111	2	0	0	0	4.53359	5.80413	0.121259	0.0645464	4.46689	4.59645	0.0483068
ENSBTAG00000004018	DGKA	diacylglycerol kinase alpha [Source:VGNC Symbol;Acc:VGNC:28024]			6.85493	7.61311	2	0	0	0	0.918782	0.402414	0	0.023879	1.05447	1.04114	0
ENSBTAG00000008612	C1R	complement C1r [Source:VGNC Symbol;Acc:VGNC:56194]			8.77567	8.65386	2	1.44e-07	0.983652	1.35015	83.835	75.3919	1.43946	1.151	76.7382	73.8235	1.4463
ENSBTAG00000050852	CXCL9	C-X-C motif chemokine ligand 9 [Source:NCBI gene;Acc:513990]			11.4785	11.2543	2	0.640376	0.234908	0.259475	1399.62	771.654	0.403896	0.248149	1248.17	668.735	0.310217
ENSBTAG00000015352	MTMR4	myotubularin related protein 4 [Source:VGNC Symbol;Acc:VGNC:31743]		-7.04298	-5.10952	-7.22618	3	0.350922	0.20058	0.286684	0.0355573	3.2e-05	0	0	2.2e-06	0	0
ENSBTAG00000015414	TBCD	tubulin folding cofactor D [Source:VGNC Symbol;Acc:VGNC:35652]		-5.93319	-6.07468	-6.11723	3	0.125103	0.131646	0.27359	0	0	0	0	0	0	0
ENSBTAG00000014182	CTNNA1	catenin alpha 1 [Source:VGNC Symbol;Acc:VGNC:27799]		-5.89995	-6.04144	-6.08399	3	0.204482	0.319316	0.194531	0	0	0	0	0	0	0
ENSBTAG00000011917	GPAM	glycerol-3-phosphate acyltransferase, mitochondrial [Source:VGNC Symbol;Acc:VGNC:29510]		-5.71189	-5.85339	-5.89593	3	0.336682	0.191682	0.0985445	0	0	0	0	0	0	0
ENSBTAG00000021468	MED24	mediator complex subunit 24 [Source:VGNC Symbol;Acc:VGNC:31361]		-4.99466	-5.13616	-5.1787	3	0.0644988	0.134072	0.0535989	0	0	0	0	0	0	0
ENSBTAG00000025233	CBARP	CACN subunit beta associated regulatory protein [Source:VGNC Symbol;Acc:VGNC:26806]		-1.43933	-2.22399	-2.17374	3	2.09048	3.59915	2.23948	0.529886	0.619009	1.11949	1.08339	0.804337	0.452097	0.763845
ENSBTAG00000037526	FABP4	fatty acid binding protein 4, adipocyte [Source:NCBI gene;Acc:281759]		-1.43849	-2.22313	-2.2428	3	828.036	866.525	853.063	275.69	134.807	341.877	251.168	244.431	152.113	424.618
ENSBTAG00000002485	TNS1	tensin 1 [Source:VGNC Symbol;Acc:VGNC:36207]		-1.36673	-2.38549	-2.56436	3	16.1146	17.2169	21.8666	4.43895	3.02333	7.49509	4.67097	4.29139	2.54068	11.3806
ENSBTAG00000012938	JARID2	jumonji and AT-rich interaction domain containing 2 [Source:VGNC Symbol;Acc:VGNC:30371]		-1.34073	-1.16219	-1.50018	3	10.2402	11.9421	8.65169	5.26749	4.35827	4.0158	3.89951	4.2697	3.51542	4.60895
ENSBTAG00000043553	GPX3	glutathione peroxidase 3 [Source:VGNC Symbol;Acc:VGNC:29619]		-1.31209	-1.5812	-1.76379	3	7.43219	3.74192	4.23587	1.5723	1.88113	2.41788	1.63477	1.51357	1.60603	2.18351
ENSBTAG00000053365	0	CD300e molecule [Source:NCBI gene;Acc:524761]		-1.26798	-1.44327	-1.77922	3	105.253	193.767	149.166	50.6581	61.894	54.9091	63.2897	36.4217	56.9906	72.9352
ENSBTAG00000001359	B3GNT7	UDP-GlcNAc:betaGal beta-1,3-N-acetylglucosaminyltransferase 7 [Source:VGNC Symbol;Acc:VGNC:26383]		-1.25229	-1.30472	-1.44552	3	3.8495	4.57452	2.77437	1.96185	1.24657	1.77782	1.60603	1.66951	1.24784	1.41323
ENSBTAG00000012849	COL4A1	collagen type IV alpha 1 chain [Source:VGNC Symbol;Acc:VGNC:50081]		-1.25089	-2.75067	-2.65356	3	10.6669	9.05335	5.59204	1.53078	1.05223	4.40159	3.0393	1.92556	0.962708	3.30544
ENSBTAG00000018326	FXYD7	FXYD domain containing ion transport regulator 7 [Source:VGNC Symbol;Acc:VGNC:29159]		-1.23388	-2.66385	-2.66113	3	5.28535	7.70657	7.63693	0.902646	1.35617	3.29587	2.19549	1.05737	1.27247	3.62337
ENSBTAG00000004038	ABAT	4-aminobutyrate aminotransferase [Source:VGNC Symbol;Acc:VGNC:25454]		-1.23362	2.94758	2.57591	3	1.76575	1.17004	1.49715	11.052	12.5903	0.911415	0.445904	8.7499	10.0111	0.674089
ENSBTAG00000015936	BRINP1	BMP/retinoic acid inducible neural specific 1 [Source:VGNC Symbol;Acc:VGNC:26567]		-1.21044	-1.73735	-1.63348	3	1.43647	1.90857	1.8917	0.557065	0.531451	0.989408	0.461599	0.628383	0.569916	1.01614
ENSBTAG00000000033	PHOSPHO1	phosphoethanolamine/phosphocholine phosphatase 1 [Source:VGNC Symbol;Acc:VGNC:32842]		-1.19921	-3.00101	-3.72709	3	4.89919	4.4983	3.91152	0.414764	0.783906	1.5755	1.97786	0.247466	0.535176	2.45051
ENSBTAG00000001219	0	0		-1.18889	-3.32568	-2.72015	3	32.5824	27.7672	33.8213	2.8118	3.79025	11.2763	10.8239	5.23023	4.946	22.5072
ENSBTAG00000047158	LRFN1	leucine rich repeat and fibronectin type III domain containing 1 [Source:VGNC Symbol;Acc:VGNC:30975]		-1.17879	-1.58106	-1.84693	3	9.33409	10.2344	8.17765	2.86696	3.6499	3.99644	4.15286	2.66012	2.91596	4.41911
ENSBTAG00000015938	ARAP3	ArfGAP with RhoGAP domain, ankyrin repeat and PH domain 3 [Source:VGNC Symbol;Acc:VGNC:58361]		-1.16831	-1.60007	-1.82037	3	12.2399	15.5549	17.0093	5.9064	4.42269	7.40684	4.48018	5.20917	3.86156	9.4891
ENSBTAG00000005850	DLK2	delta like non-canonical Notch ligand 2 [Source:VGNC Symbol;Acc:VGNC:28093]		-1.16645	-2.78811	-2.75427	3	6.88217	3.94451	6.33598	0.841238	0.843238	2.8006	2.14485	1.24644	0.617848	2.81651
ENSBTAG00000002939	FURIN	furin, paired basic amino acid cleaving enzyme [Source:VGNC Symbol;Acc:VGNC:29146]		-1.13208	-1.1758	-1.47419	3	129.287	148.616	144.894	64.8543	66.2869	74.9449	65.1745	55.2648	54.8283	61.3895
ENSBTAG00000004280	SRPX	sushi repeat containing protein X-linked [Source:VGNC Symbol;Acc:VGNC:50570]		-1.10671	-2.00427	-2.01924	3	7.95994	8.79329	7.49051	2.13338	2.09181	3.5058	4.14995	2.34161	1.94406	4.08406
ENSBTAG00000011403	RUSC2	RUN and SH3 domain containing 2 [Source:VGNC Symbol;Acc:VGNC:34222]		-1.09701	-1.15088	-1.3598	3	14.8181	16.8105	7.99884	6.19966	5.72017	6.75692	5.636	5.56924	5.02573	6.05337
ENSBTAG00000012348	LRRC71	leucine rich repeat containing 71 [Source:VGNC Symbol;Acc:VGNC:31025]		-1.08956	-3.01084	-3.03666	3	69.1982	102.866	72.7178	9.59355	11.4255	31.2438	42.9288	8.72395	12.9312	43.4671
ENSBTAG00000046671	WFS1	wolframin ER transmembrane glycoprotein [Source:VGNC Symbol;Acc:VGNC:36936]		-1.08096	-1.22598	-1.30608	3	18.7579	27.7188	22.5199	9.58184	10.9649	9.6751	10.3303	9.71553	10.275	13.7779
ENSBTAG00000008827	SPOCK2	SPARC (osteonectin), cwcv and kazal like domains proteoglycan 2 [Source:VGNC Symbol;Acc:VGNC:35226]		-1.05466	-1.75992	-1.95757	3	366.277	327.156	254.72	108.238	86.2112	218.754	113.199	92.7305	80.9049	156.469
ENSBTAG00000053007	ITPKB	inositol-trisphosphate 3-kinase B [Source:NCBI gene;Acc:540877]		-1.0383	-1.88489	-1.71252	3	19.3173	24.4433	18.269	5.91219	5.71628	10.0497	10.2814	7.56626	5.97519	10.8782
ENSBTAG00000008182	FOSB	FosB proto-oncogene, AP-1 transcription factor subunit [Source:VGNC Symbol;Acc:VGNC:29074]		-1.03299	-1.80882	-1.76158	3	1.62633	2.35813	2.2343	0.591747	0.624424	0.841171	1.22054	0.680147	0.612331	1.07239
ENSBTAG00000001101	IFNLR1	interferon lambda receptor 1 [Source:VGNC Symbol;Acc:VGNC:30061]		-1.03046	-1.48255	-2.22247	3	0.890631	1.48135	0.861194	0.396375	0.386056	0.593328	0.517894	0.240117	0.239298	0.496498
ENSBTAG00000019044	BAIAP2	BAR/IMD domain containing adaptor protein 2 [Source:VGNC Symbol;Acc:VGNC:26412]		-1.01196	-1.03633	-1.20384	3	14.5411	22.5702	19.7691	8.77552	10.3376	9.33473	8.63253	8.66516	8.84927	10.8796
ENSBTAG00000007920	PANK2	pantothenate kinase 2 [Source:VGNC Symbol;Acc:VGNC:32564]		1.05395	1.32188	1.21922	3	10.2326	10.9427	10.049	26.3521	28.806	21.8338	22.9638	26.1133	26.4101	23.2943
ENSBTAG00000015346	NASP	nuclear autoantigenic sperm protein [Source:VGNC Symbol;Acc:VGNC:31887]		1.10736	1.04628	1.21041	3	49.4379	39.4472	69.649	114.586	108.24	127.724	117.828	131.563	123.468	105.118
ENSBTAG00000044000	PRIM1	DNA primase subunit 1 [Source:VGNC Symbol;Acc:VGNC:49067]		1.11358	1.20042	1.20835	3	4.7371	3.03245	5.70568	11.9875	9.33296	10.1376	10.8862	11.9329	9.74804	9.10871
ENSBTAG00000014375	TMCC3	transmembrane and coiled-coil domain family 3 [Source:VGNC Symbol;Acc:VGNC:35927]		1.13627	1.20882	1.40446	3	3.67179	2.10765	1.66353	5.94275	5.53669	5.62035	5.22139	6.12418	7.46736	5.35259
ENSBTAG00000009566	CCNH	cyclin H [Source:NCBI gene;Acc:615512]		1.19326	-7.66959	-7.69145	3	8.47477	6.27119	5.72816	0	0.0861539	12.2754	20.0836	0.0845331	0	16.8829
ENSBTAG00000046158	CFB	complement factor B [Source:NCBI gene;Acc:514076]		1.20516	5.93869	5.72122	3	1.15729	2.38118	1.27534	97.6367	100.223	3.95256	3.04928	101.059	75.2951	4.17403
ENSBTAG00000013275	MAD2L2	mitotic arrest deficient 2 like 2 [Source:VGNC Symbol;Acc:VGNC:31132]		1.28249	1.08038	1.18929	3	10.8585	8.08191	10.5132	23.0822	20.121	29.8342	23.1464	24.9736	22.1766	20.5764
ENSBTAG00000005979	HELLS	helicase, lymphoid specific [Source:VGNC Symbol;Acc:VGNC:29805]		1.28283	1.09077	1.31514	3	9.38522	7.89338	13.1155	23.849	20.7302	29.5821	26.5165	31.181	22.6721	22.3956
ENSBTAG00000016649	CCND2	cyclin D2 [Source:VGNC Symbol;Acc:VGNC:26963]		1.28615	1.35338	1.37596	3	12.47	7.30197	15.0621	30.4047	28.7969	29.0603	31.288	30.9397	30.8749	24.1551
ENSBTAG00000031814	SDS	serine dehydratase [Source:VGNC Symbol;Acc:VGNC:34399]		1.30595	-2.80495	-1.32454	3	173.551	251.139	151.586	25.9355	30.9526	457.02	477.966	78.4531	84.6384	520.588
ENSBTAG00000004931	POLE2	DNA polymerase epsilon 2, accessory subunit [Source:VGNC Symbol;Acc:VGNC:33119]		1.4198	1.67692	1.71653	3	3.53053	1.87826	5.4281	12.6914	9.78208	9.83474	7.65104	13.0614	10.356	10.9928
ENSBTAG00000051299	0	0		1.64858	1.46156	1.6581	3	5.04605	3.20193	7.27172	15.3635	13.0397	17.0224	15.5077	18.4784	14.2326	14.9266
ENSBTAG00000004716	RETN	resistin [Source:VGNC Symbol;Acc:VGNC:33877]		1.70627	2.05136	2.01426	3	6.59466	12.047	5.7114	26.2465	42.4903	28.7447	36.184	29.1928	38.5657	16.7195
ENSBTAG00000011563	TNFSF13B	tumor necrosis factor ligand superfamily member 13B-like [Source:NCBI gene;Acc:107131142]		1.76346	2.20102	2.18311	3	1.65713	1.91276	2.20979	11.7646	7.39084	8.49999	5.18007	10.6264	8.29383	7.45006
ENSBTAG00000016424	MMP25	matrix metallopeptidase 25 [Source:VGNC Symbol;Acc:VGNC:31527]		2.59471	2.63053	2.79317	3	1.5433	0.32876	0.516085	4.55496	3.88349	4.68018	4.32628	6.43363	3.54946	3.23707
ENSBTAG00000024918	BIRC3	baculoviral IAP repeat containing 3 [Source:VGNC Symbol;Acc:VGNC:26500]		3.07462	1.27244	2.19477	3	24.8771	18.8799	15.5819	54.6282	45.3028	205.088	197.394	128.995	72.0494	137.807
ENSBTAG00000003191	FSCN1	fascin actin-bundling protein 1 [Source:VGNC Symbol;Acc:VGNC:29126]		4.60788	3.61875	3.87463	3	5.05814	2.05127	2.61361	62.6809	24.2208	127.607	56.943	76.4216	29.651	60.2076
ENSBTAG00000053649	CCL5	C-C motif chemokine ligand 5 [Source:NCBI gene;Acc:327712]		4.92876	5.83879	5.43858	3	1.28886	1.70301	1.82766	103.687	87.7151	70.0448	46.8427	97.1396	56.6062	39.6994

## Sheet: S1B
target_id	log2FC	RH_1 TPM	RH_2 TPM	RH_3 TPM	IRH_1 TPM	IRH_2 TPM		RH = Toxoplasma
TGGT1_301460-t26_1	2.49925	43.98	39.373	44.388	202.075	282.04		IRH = IFNG+Toxoplasma
TGGT1_244140-t26_1	2.15827	46.37	55.527	47.283	205.352	219.563		log2FC relative to RH
TGGT1_411760-t26_1	2.28044	16024.4	19742.6	19134.7	77642.7	93776.6
TGGT1_221220-t26_1	2.54007	31.273	43.002	26.512	184.495	172.627
TGGT1_266760-t26_1	1.95135	132.656	137.302	141.656	441.288	605.137
TGGT1_262740-t26_1	1.84085	60.572	61.847	51.155	178.224	226.826
TGGT1_363250-t26_1	2.56259	97.458	150.726	89.972	484.874	806.61
TGGT1_226650-t26_1	1.94101	109.949	123.841	73.144	340.797	398.07
TGGT1_305160-t26_1	2.22719	31.79	53.844	28.37	158.383	158.871
TGGT1_231815-t26_1	1.91202	12.261	9.821	19.441	48.289	55.787
TGGT1_293020-t26_1	1.62907	0.717	0.673	0.965	5.461	0
TGGT1_294850-t26_1	2.03472	1.195	0.673	0	0	7.14
TGGT1_295020-t26_1	1.79082	4.302	9.086	3.281	15.292	14.281
TGGT1_295105-t26_1	-1.69199	44.636	29.534	146.569	14.924	24.114
TGGT1_295685-t26_1	1.9547	0.239	0.673	1.158	5.461	0
TGGT1_295945-t26_1	2.19912	2.39	4.375	0.193	5.461	3.57
TGGT1_209585-t26_1	1.98384	1.673	1.683	0.772	3.277	7.14
TGGT1_209900-t26_1	-2.34571	3.346	3.365	15.053	1.092	0
TGGT1_209985-t26_1	1.61229	19.6	19.844	6.755	30.584	51.767
TGGT1_410530-t26_1	2.89922	0.478	0	0	0	5.355
TGGT1_297670-t26_1	1.51654	4.78	4.038	2.895	14.2	5.355
TGGT1_252640-t26_1	1.70556	1.195	1.346	1.158	2.185	7.14
TGGT1_253530-t26_1	-3.93796	10.278	8.413	13.509	0	0
TGGT1_253710-t26_1	1.82548	11.234	7.74	2.895	20.754	17.851
TGGT1_254915-t26_1	-3.20873	3.107	3.702	16.404	0	0
TGGT1_210682-t26_1	1.65191	7.649	14.134	1.351	10.923	16.066
TGGT1_211050-t26_1	2.06992	2.151	1.683	0.193	2.185	5.355
TGGT1_211280-t26_1	2.27111	3.585	5.384	0.772	7.646	14.281
TGGT1_211360-t26_1	1.73896	4.302	2.692	1.351	6.554	8.925
TGGT1_211370-t26_1	1.82658	2.39	3.365	1.93	9.831	5.355
TGGT1_301140-t26_1	2.48969	1.195	4.375	0.386	7.646	3.57
TGGT1_301160-t26_1	-1.54246	20.297	21.067	29.962	8.738	5.355
TGGT1_301280-t26_1	-2.06165	8.605	5.048	5.597	0	5.355
TGGT1_319380-t26_1	-2.02564	5.497	2.019	7.72	1.092	0
TGGT1_320135-t26_1	-1.90547	4.78	5.048	5.404	0	3.57
TGGT1_212940-t26_1	-2.0941	10.278	6.731	18.334	2.185	1.785
TGGT1_213415-t26_1	1.77172	4.302	5.048	5.597	13.108	23.206
TGGT1_213560-t26_1	3.01095	0.956	1.346	0.193	4.369	5.355
TGGT1_213790-t26_1	-2.13556	9.819	11.136	30.948	1.092	10.71
TGGT1_220080-t26_1	1.73524	1.434	1.346	1.158	2.185	8.925
TGGT1_220128-t26_1	1.57021	4.302	1.683	0.772	7.646	1.785
TGGT1_220560-t26_1	2.55094	2.151	1.683	0.579	9.831	3.57
TGGT1_284160-t26_1	-2.34102	5.497	6.731	6.948	1.092	0
TGGT1_285290-t26_1	-1.75368	27.487	17.836	68.705	10.923	7.14
TGGT1_286060-t26_1	-1.50739	3.107	2.019	5.211	1.092	0
TGGT1_238110-t26_1	-2.85792	7.649	6.394	15.825	0	3.57
TGGT1_239855-t26_1	2.32823	3.824	2.356	0.193	6.554	3.57
TGGT1_239880-t26_1	-1.65118	5.019	5.384	4.246	0	5.355
TGGT1_240460-t26_1	-2.84338	7.649	9.423	20.65	0	7.14
TGGT1_240575-t26_1	-1.63351	14.102	18.845	12.737	2.185	8.925
TGGT1_202020-t26_1	1.95251	15.297	16.49	2.316	20.754	39.271
TGGT1_202050-t26_1	2.62236	0	0	0.772	0	7.14
TGGT1_202090-t26_1	3.40924	1.434	4.375	0	4.369	10.71
TGGT1_203682-t26_1	3.49478	0	0.673	0.193	1.092	7.14
TGGT1_203900-t26_1	2.4384	0.478	3.029	0.193	1.092	10.71
TGGT1_204460-t26_1	2.658	1.673	4.038	0	2.185	7.14
TGGT1_205050-t26_1	1.53964	10.278	10.096	3.281	22.938	10.71
TGGT1_205110-t26_1	-1.97805	6.693	4.038	5.211	0	3.57
TGGT1_280420-t26_1	1.82141	0.956	1.01	0.579	1.092	7.14
TGGT1_280570-t26_1	1.91674	1.434	0.337	0.579	6.554	0
TGGT1_281560-t26_1	1.62179	1.434	3.029	0.772	5.461	1.785
TGGT1_257360-t26_1	-1.56736	19.361	23.557	23.352	13.108	1.785
TGGT1_257790-t26_1	-1.59813	5.975	4.711	7.334	1.092	1.785
TGGT1_259130-t26_1	-2.4067	5.975	8.077	6.562	1.092	0
TGGT1_259140-t26_1	-1.70761	18.883	20.865	20.264	3.277	10.71
TGGT1_262970-t26_1	1.95252	58.56	59.228	11.001	121.245	107.104
TGGT1_358240-t26_1	-2.06825	17.926	13.124	12.351	3.277	1.785
TGGT1_408930-t26_1	3.05987	0	0.389	0	0	5.355
TGGT1_200295-t26_1	2.01658	2.905	3.702	0.579	6.554	5.355
TGGT1_229005-t26_1	-1.91633	8.605	8.413	7.527	3.277	0
TGGT1_229730-t26_1	2.22182	1.195	2.692	0.772	9.831	1.785
TGGT1_231350-t26_1	-3.53681	7.888	1.683	19.878	0	0
TGGT1_231590-t26_1	-1.51498	11.712	19.182	20.65	8.738	1.785
TGGT1_231991-t26_1	1.66279	1.673	2.692	2.702	7.646	5.355
TGGT1_233090-t26_1	-1.79591	11.951	10.129	18.348	4.369	1.785
TGGT1_233720-t26_1	-1.51733	9.8	9.423	9.843	7.646	0
TGGT1_268210-t26_1	-1.55267	10.039	9.423	14.281	2.185	5.355
TGGT1_270130-t26_1	-2.09238	10.517	7.067	13.895	1.092	3.57
TGGT1_271310-t26_1	1.9208	2.151	3.365	1.93	7.646	8.925
TGGT1_271315-t26_1	1.59394	0.478	2.019	0.965	6.554	0
TGGT1_274140-t26_1	2.30178	0.717	0.337	0	0	5.355
TGGT1_356590-t26_1	3.16049	0.239	0.337	0.193	1.092	7.14
TGGT1_264485-t26_1	1.62205	43.024	48.123	15.825	105.953	67.832
TGGT1_265205-t26_1	2.06749	4.063	5.384	1.737	16.384	7.14
TGGT1_265255-t26_1	1.96441	1.195	0.337	1.158	2.185	5.355
TGGT1_266600-t26_1	2.21523	11.234	11.442	0.772	14.2	21.421
TGGT1_267875-t26_1	-2.08927	6.693	2.356	6.755	1.092	0
TGGT1_288845-t26_1	-1.83518	5.736	5.721	6.755	2.185	0
TGGT1_288900-t26_1	-1.63284	6.454	4.038	7.913	1.092	1.785
TGGT1_290585-t26_1	3.45123	0.239	0.337	0.193	2.185	5.355
TGGT1_292260-t26_1	-1.74786	10.756	6.057	8.106	4.369	0
TGGT1_292275-t26_1	-3.07063	4.792	3.399	9.864	0.011	0
TGGT1_305498-t26_1	2.62479	0	0	0.579	0	5.355
TGGT1_306450-t26_1	2.10126	5.497	5.721	3.088	15.292	23.206
TGGT1_306455-t26_1	2.27872	1.434	2.356	1.351	8.738	5.355
TGGT1_306570-t26_1	2.21016	0.239	1.683	0.386	5.461	0
TGGT1_306710-t26_1	1.66572	2.151	0.673	0.579	7.646	0
TGGT1_410760-t26_1	-1.55096	6.493	3.365	8.409	3.277	0
TGGT1_207150-t26_1	1.68165	1.951	0	1.042	5.096	0
TGGT1_214190-t26_1	-1.92917	6.454	4.375	3.86	1.092	0
TGGT1_223262-t26_1	2.29204	15.297	11.778	3.474	40.415	30.346
TGGT1_225290-t26_1	1.62452	10.517	11.778	4.246	20.754	23.206
TGGT1_227400-t26_1	-1.52756	3.346	4.711	6.948	2.185	0
TGGT1_228050-t26_1	2.27003	0.956	2.356	0.579	3.277	7.14
TGGT1_236595-t26_1	2.29485	1.434	5.384	0	2.185	3.57
TGGT1_216140-t26_1	1.79719	14.58	17.836	9.65	52.43	30.346
TGGT1_216280-t26_1	2.43546	2.151	0.337	0.386	5.461	1.785
TGGT1_308945-t26_1	-2.17717	2.825	1.084	6.081	0	0
TGGT1_309030-t26_1	1.69935	1.195	0.673	0.772	1.092	7.14
TGGT1_309830-t26_1	1.59554	2.39	5.048	1.544	5.461	8.925
TGGT1_310260-t26_1	2.77817	2.629	0.337	0	1.092	7.14
TGGT1_310680-t26_1	3.77856	0	0.673	0	5.461	0
TGGT1_311280-t26_1	-2.94932	4.541	1.01	15.053	0	0
TGGT1_312075-t26_1	-1.53787	5.258	9.759	10.615	5.461	0
TGGT1_312435-t26_1	1.5736	7.649	10.096	4.439	19.661	16.066
TGGT1_313050-t26_1	2.83291	3.346	1.683	0.193	6.554	7.14
TGGT1_313475-t26_1	-1.56464	5.258	4.375	5.018	0	7.14
TGGT1_314250-t26_1	1.94497	4.541	4.375	5.597	16.384	21.421
TGGT1_316400A-t26_1	-1.75744	15.536	18.172	50.371	7.646	5.355
TGGT1_316700-t26_1	-1.74159	4.063	3.702	7.141	0	5.355
TGGT1_217692-t26_1	-1.8611	11.951	6.057	11.579	2.185	1.785
TGGT1_218340-t26_1	1.51802	9.322	9.423	2.316	16.384	10.71
TGGT1_219610-t26_1	1.59571	3.824	5.048	1.351	6.554	8.925
TGGT1_246640-t26_1	4.1746	1.195	0.673	0	5.461	8.925
TGGT1_248430-t26_1	1.66399	1.434	1.683	1.158	2.185	8.925
TGGT1_248470-t26_1	2.19277	0.478	2.356	1.351	4.369	5.355
TGGT1_249230-t26_1	1.96275	2.39	2.019	0.193	2.185	5.355
TGGT1_277220-t26_1	-1.78715	16.731	9.086	23.159	3.277	5.355
TGGT1_277950-t26_1	-1.64365	4.302	2.019	5.018	1.092	0
TGGT1_277980-t26_1	1.9741	0	0.673	0.965	0	8.925
TGGT1_278878-t26_1	-1.56523	12.429	9.086	12.647	9.831	0
TGGT1_278882-t26_1	-1.57135	18.883	12.451	17.459	4.369	5.355
TGGT1_278920-t26_1	-2.17895	9.083	7.067	18.141	1.092	3.57
TGGT1_300130-t26_1	1.68125	10.278	11.778	2.123	13.108	24.991
TGGT1_359000-t26_1	1.59257	4.063	1.683	1.351	10.923	1.785
TGGT1_360050-t26_1	-1.6628	5.497	7.067	14.474	2.185	1.785
TGGT1_280070B-t26_1	2.84529	0.081	0.16	0.833	5.981	0
TGGT1_410480-t26_1	2.62479	0	0	0.579	0	5.355
TGGT1_410600-t26_1	1.92488	1.675	2.028	2.161	5.71	9.372
TGGT1_410610-t26_1	2.65766	1.042	0.684	0.829	4.369	7.14
TGGT1_217961-t26_1	1.65818	6.998	8.557	2.029	11.367	16.066
TGGT1_279560-t26_1	5.19614	5.723	0	0	16.302	14.281
TGGT1_411410-t26_1	3.66137	0	0	0.565	6.554	0
TGGT1_358470-t26_1	-2.73319	4.3	4.043	5.489	0	0
TGGT1_356400-t26_1	1.52791	19.849	23.549	9.848	51.089	31.685
TGGT1_411660-t26_1	-1.87903	7.291	6.796	13.428	1.092	3.57
TGGT1_411830-t26_1	3.22213	0	1.975	0	0	16.416
TGGT1_275370-t26_1	-2.32636	7.41	5.048	22.194	3.277	0
TGGT1_253540-t26_1	-1.95359	1.673	0.673	8.106	0	0
TGGT1_254630-t26_1	-1.63998	20.317	10.769	53.073	15.292	1.785
TGGT1_301170-t26_1	-1.57139	9.573	10.684	39.482	8.738	1.887
TGGT1_318760-t26_1	-2.47867	5.975	2.019	18.72	0	3.57
TGGT1_212780-t26_1	-2.09083	18.405	16.49	144.743	5.461	16.066
TGGT1_213752-t26_1	-1.68632	4.063	2.019	11.965	2.185	0
TGGT1_285860-t26_1	-1.55257	4.302	5.048	17.562	2.185	1.785
TGGT1_285990-t26_1	-1.6238	16.014	10.769	54.81	6.554	7.14
TGGT1_286140-t26_1	-1.59491	8.605	2.692	15.439	5.461	0
TGGT1_244726-t26_1	-1.68257	1.195	0.673	6.755	0	0
TGGT1_280770-t26_1	-2.13344	24.38	19.518	172.148	14.2	5.355
TGGT1_257550-t26_1	-1.77216	18.644	16.826	123.321	6.554	19.636
TGGT1_262933-t26_1	-1.60587	16.492	12.451	52.687	5.461	10.71
TGGT1_229350-t26_1	-1.84463	9.322	7.74	35.51	2.185	7.14
TGGT1_233540-t26_1	-1.53545	6.932	7.067	22.58	4.369	1.785
TGGT1_268240-t26_1	-1.59012	9.561	6.731	48.441	3.277	8.925
TGGT1_210280-t26_1	-1.60596	9.8	4.375	24.124	2.185	5.355
TGGT1_265175-t26_1	-1.57334	5.258	1.01	4.632	0	1.785
TGGT1_267140-t26_1	-2.22111	6.61	3.218	25.849	3.277	0
TGGT1_289340-t26_1	-1.50338	8.605	7.404	27.791	3.277	5.355
TGGT1_227370-t26_1	-1.52787	2.39	6.731	7.527	2.185	0
TGGT1_409790-t26_1	1.55173	2.39	1.683	0.193	5.461	0
TGGT1_216375-t26_1	-1.50923	2.39	5.048	8.492	2.185	0
TGGT1_311270-t26_1	-2.61364	7.41	2.356	23.545	0	5.355
TGGT1_311740-t26_1	-1.78602	23.902	15.48	76.425	7.646	10.71
TGGT1_314370-t26_1	-1.59009	3.107	1.01	8.492	1.092	0
TGGT1_217740-t26_1	-1.59997	13.863	8.75	51.336	5.461	7.14
TGGT1_219100-t26_1	-1.57166	25.097	12.451	69.67	8.738	10.71
TGGT1_232560-t26_1	-1.69645	18.166	18.845	126.988	16.384	5.355
TGGT1_203175-t26_1	-1.65355	2.39	0	10.036	0	0
TGGT1_273130-t26_1	-1.50104	7.649	6.394	51.336	3.277	8.925
TGGT1_217750-t26_1	-1.61724	6.454	0.337	18.72	0	8.925
TGGT1_224570-t26_1	-1.64152	9.561	1.683	30.493	7.646	0
